# Supplementary material
Source: PubMed Central journal article supplement (PMC11616040)
Supplement: SC-015-D4SC06462C-s001.pdf [file SC-015-D4SC06462C-s001.pdf]

# Supporting Information

## S1: Synthetic details

## S2: X-Ray diffraction studies

## S3: Theoretical details

## S4: References

## S1: Synthetic details

**General:** All manipulations were performed under an inert atmosphere of dry nitrogen, using standard Schlenk techniques. Dry, oxygen-free solvents were employed unless otherwise mentioned. The compounds L=CH<sub>2</sub> (L = 1,3-Bis(2,6-diisopropylphenyl)imidazolidin-2-ylidene), L=CHTMS, [LC(Ph)]PCl<sub>2</sub>, MesPCl<sub>2</sub> 4,5-dimethyl-1,3-diisopropylimidazol-2-ylidene (<sup>Me</sup>i<sub>pr</sub>) were prepared following literature procedures,<sup>[1]</sup> while all other starting materials were purchased from commercial sources. NMR spectra were recorded on Bruker Avance 400 MHz spectrometers (<sup>1</sup>H, 400.1 MHz; <sup>13</sup>C, 100.5 MHz; <sup>31</sup>P, 161.9 MHz) or Bruker Avance 600 MHz spectrometers (<sup>1</sup>H, 600.2 MHz; <sup>13</sup>C, 150.8 MHz; <sup>31</sup>P, 242.9 MHz). The chemical shifts (δ) were measured according to IUPAC and expressed in ppm relative to SiMe<sub>4</sub> (<sup>1</sup>H, <sup>13</sup>C), and 85% H<sub>3</sub>PO<sub>4</sub> (<sup>31</sup>P). Coupling constants *J* are reported in Hertz [Hz] as absolute values. Because of high sensitivity of these compounds or the contamination of solvents, the elemental analyses gave unsatisfying results. The high purity of these isolated compounds has been proved mainly by NMR spectra. ESI-MS spectra were measured on Bruker ESI-Q-TOF maxis 4G. UV/vis spectra were measured on Shimadzu UV/vis/NIR UV-3600-spectrometer. Melting point (M. p.) were measured on Jiahang JH30 apparatus.

## Synthesis of 1a:

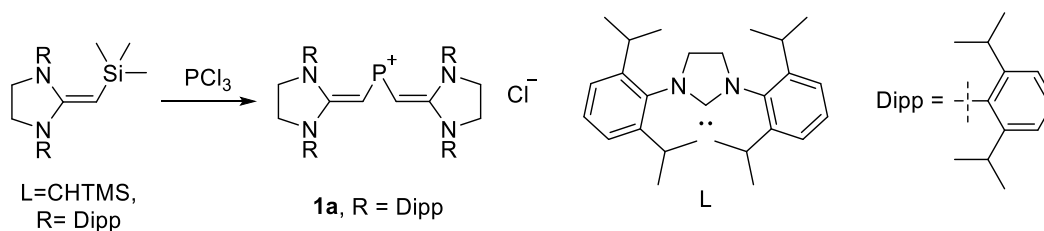

$\text{PCl}_3$  (685 mg, 5 mmol) in toluene (5 mL) was added to a stirred solution of **L=CHTMS** (5.2 g, 11 mmol) in toluene (40 mL) at room temperature. After stirring at 130 °C for 24 h, the reaction mixture was allowed to cool slowly to room temperature. The resulting precipitates were collected via filtration, then washed with hexane (2×5 mL) and dried *in vacuo* to afford **1a** (4.0 g, yield = 92 %) as an orange powder. M. p. > 250.0 °C.  $^1\text{H}$  NMR (600.2 MHz,  $\text{CD}_3\text{CN}$ ):  $\delta$  = 7.39 (t,  $J_{\text{HH}} = 7.6$  Hz, 4 H,  $\text{C}_{\text{Ar}}$ ), 7.14 (d,  $J_{\text{HH}} = 7.6$  Hz, 8 H,  $\text{C}_{\text{Ar}}$ ), 4.88 (d,  $^2J_{\text{PH}} = 13.5$  Hz, 2 H,  $\text{CHP}$ ), 3.95 (s, 8 H,  $\text{NCH}_2$ ), 2.83 (m, 8 H,  $\text{CH}(\text{CH}_3)_2$ ), 1.19 (d,  $J = 7.0$  Hz, 12 H,  $\text{CH}(\text{CH}_3)_2$ ), 0.90 (d,  $J = 7.0$  Hz, 12 H,  $\text{CH}(\text{CH}_3)_2$ ).  $^{13}\text{C}\{^1\text{H}\}$  NMR (150.8 MHz,  $\text{CD}_3\text{CN}$ ):  $\delta$  = 166.3 (d,  $^2J_{\text{PC}} = 20.9$  Hz,  $\text{NCN}$ ), 147.8 ( $\text{C}_{\text{Ar}}$ ), 133.4 ( $\text{C}_{\text{Ar}}$ ), 131.4 ( $\text{C}_{\text{Ar}}$ ), 129.9 ( $\text{C}_{\text{Ar}}$ ), 129.2 ( $\text{C}_{\text{Ar}}$ ), 126.2 ( $\text{C}_{\text{Ar}}$ ), 107.2 (d,  $^1J_{\text{PC}} = 45.0$  Hz,  $\text{CH-P}$ ), 51.9 ( $\text{NCH}_2$ ), 29.4, 24.9, 24.5.  $^{31}\text{P}\{^1\text{H}\}$  NMR (242.9 MHz,  $\text{CD}_3\text{CN}$ ):  $\delta$  = 331.8.  $^{31}\text{P}$  NMR (242.9 MHz,  $\text{CD}_3\text{CN}$ ):  $\delta$  = 331.7 (t,  $^2J_{\text{PH}} = 13.5$  Hz). UV/Vis (acetonitrile,  $\lambda$  (nm)  $\epsilon$  ( $\text{M}^{-1}\text{cm}^{-1}$ )): 332 (8125), 473.5 (43599). HRMS (ESI,  $m/z$ ) calc. for:  $\text{C}_{56}\text{H}_{78}\text{N}_4\text{P}^+$ : 837.5959 [ $\text{M}$ ] $^+$ ; found: 837.5888. IR (ATR,  $\text{cm}^{-1}$ ): 3395, 2961, 2927, 2866, 1425, 1313, 905.

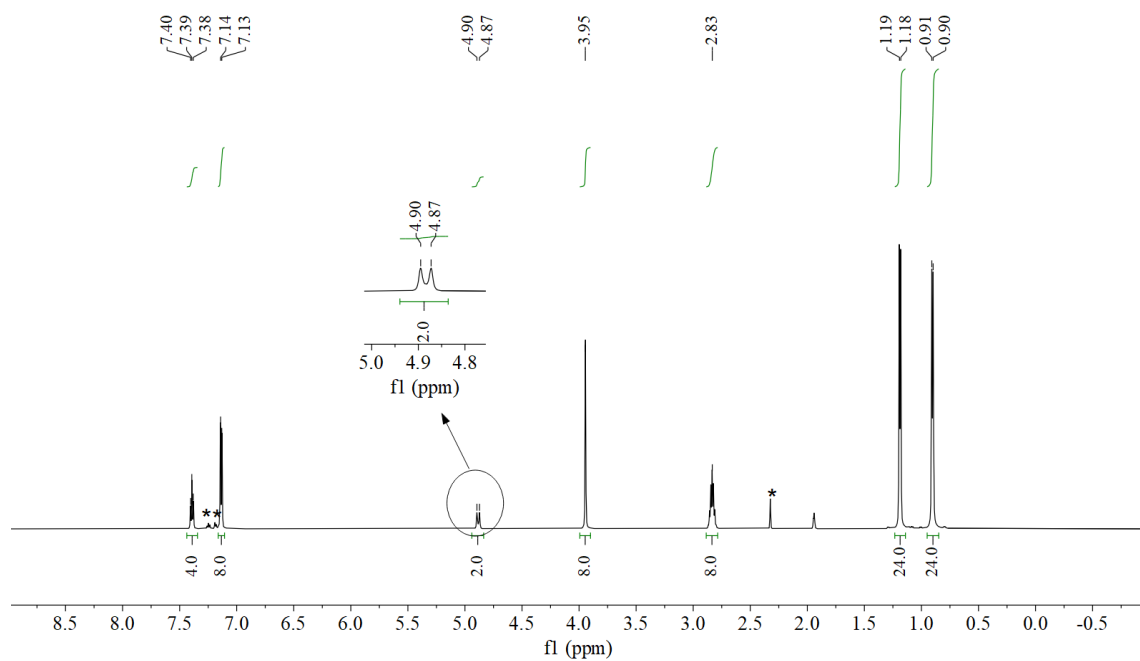

**Figure S1.**  $^1\text{H}$  NMR of **1a** in  $\text{CD}_3\text{CN}$ . \*Toluene.

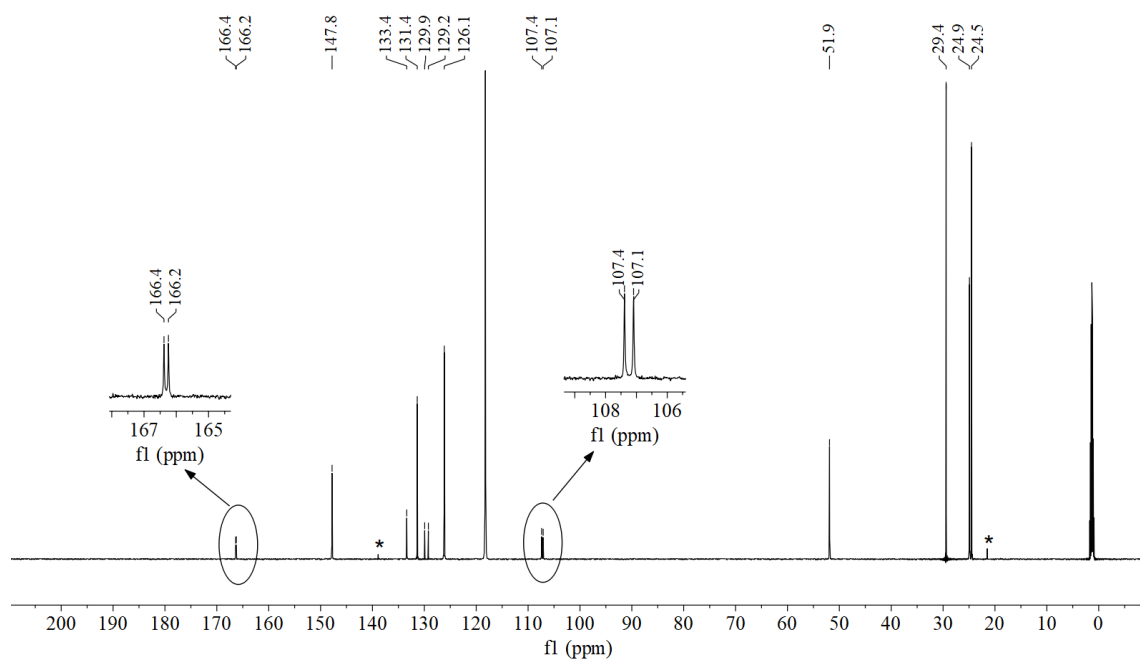

**Figure S2.**  $^{13}\text{C}\{^1\text{H}\}$  NMR of **1a** in  $\text{CD}_3\text{CN}$ . \*Toluene.

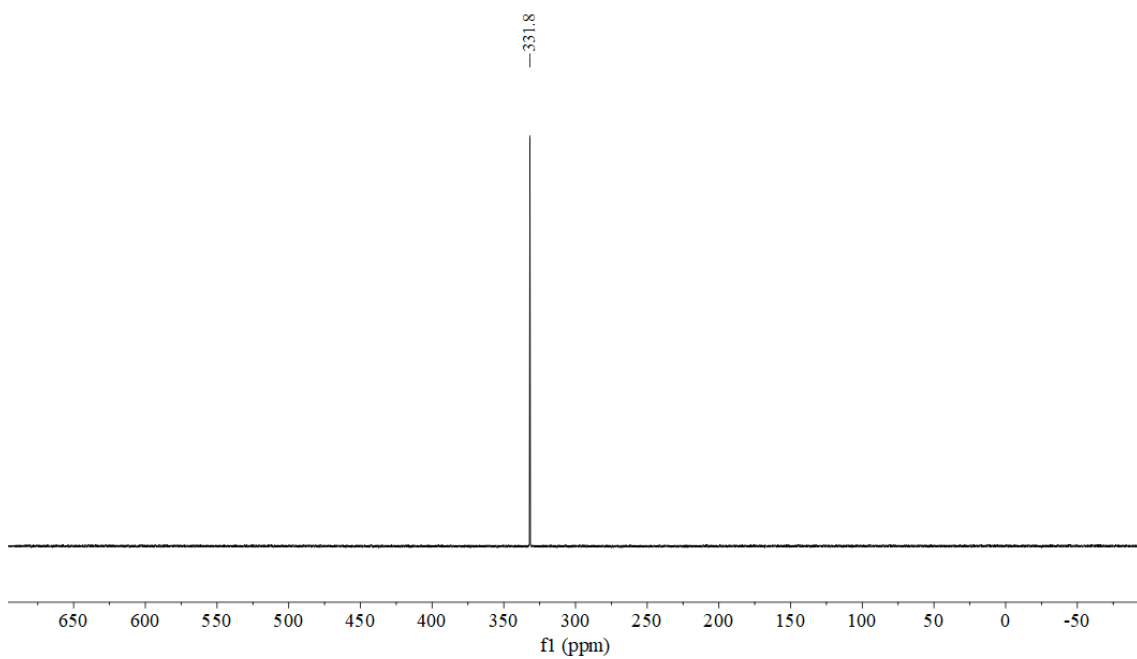

**Figure S3.**  $^{31}\text{P}\{^1\text{H}\}$  NMR of **1a** in  $\text{CD}_3\text{CN}$ .

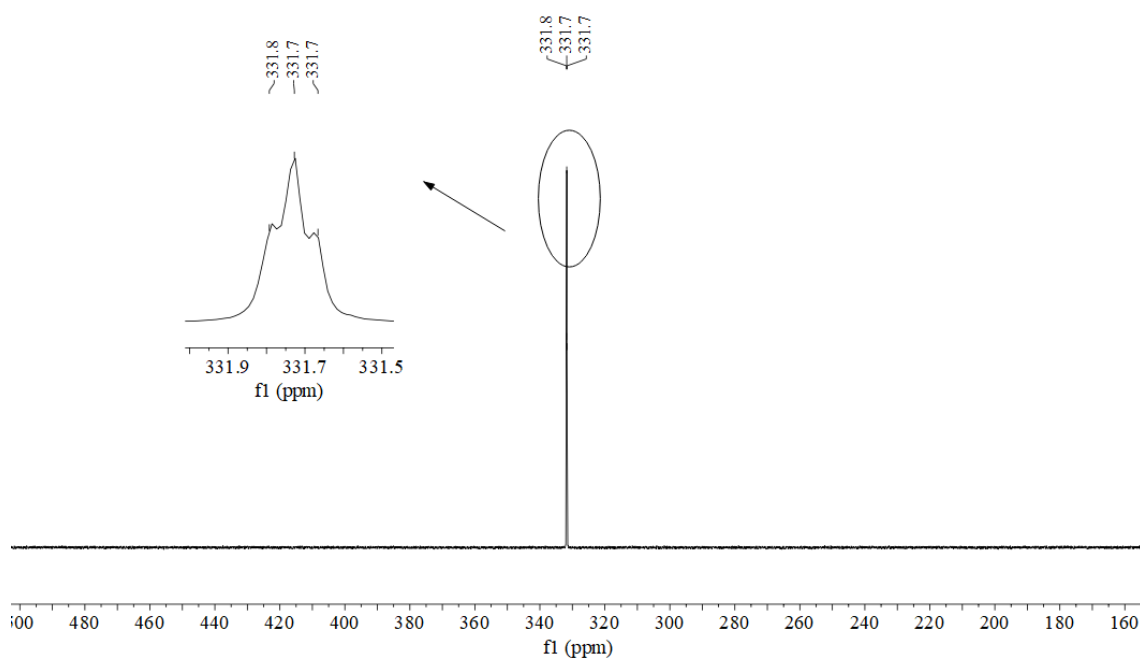

**Figure S4.**  $^{31}\text{P}$  NMR of **1a** in  $\text{CD}_3\text{CN}$ .

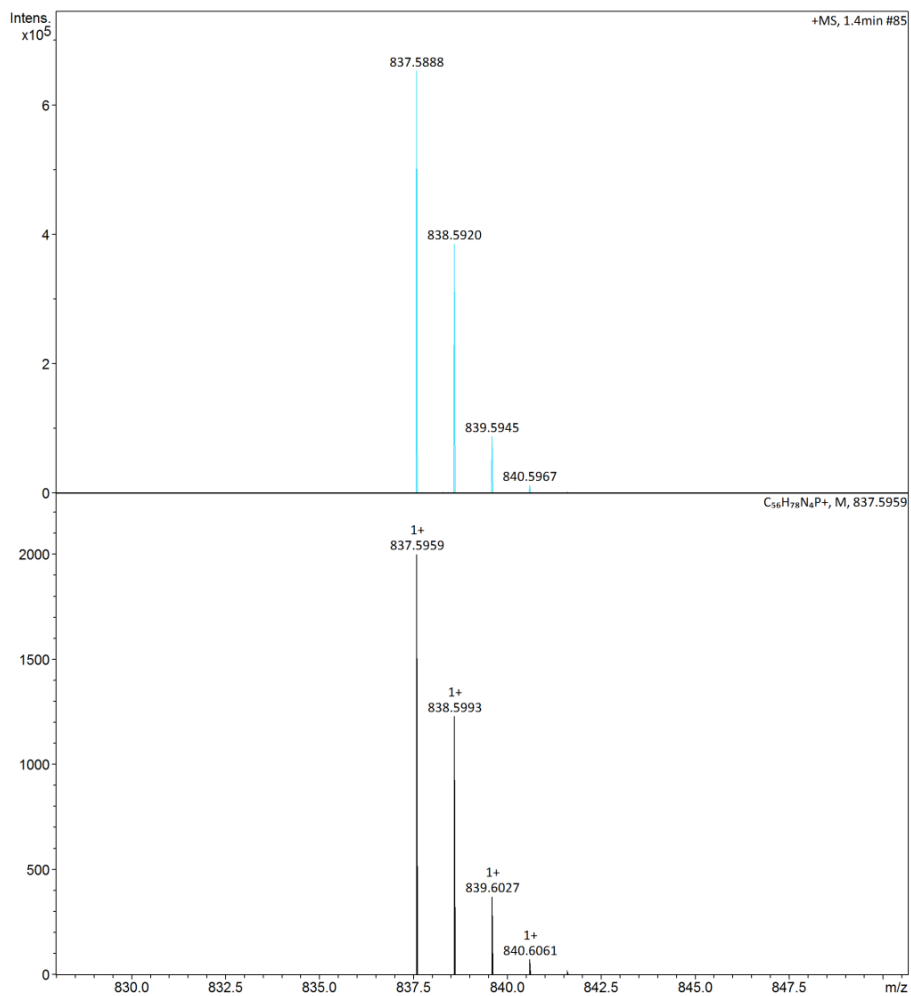

**Figure S5.** HRMS of **1a**.

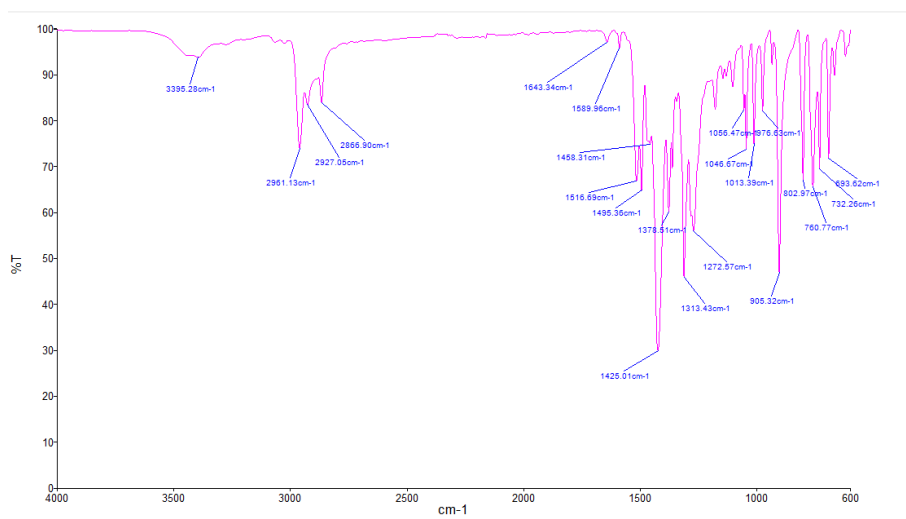

**Figure S6.** IR spectrum of **1a**.

### Synthesis of **3a**:

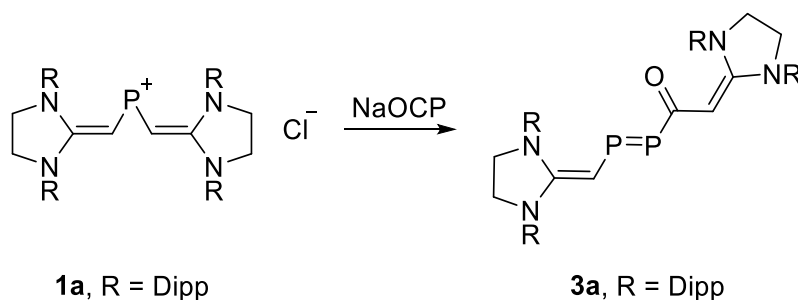

NaOCP (151 mg, 0.5 mmol) in tetrahydrofuran (10 mL) was added dropwise to a stirred solution of **1a** (450 mg, 0.5 mmol) in a mixed solvent of acetonitrile (1 mL) and tetrahydrofuran (20 mL). After stirring for 20 minutes, the solvent was removed under reduced pressure. The remaining solid was extracted with a mixed solvent of hexane (20 mL) and diethyl ether (10 mL). The mixture was then filtered and concentrated to approximately 5 mL with a concomitant precipitation. The precipitates were collected, washed with a minimum amount of cold hexane (2×1 mL) and dried *in vacuo* to afford **3a** (340 mg, 76 %) as a red powder. Red crystals of **3a** were obtained from a saturated hexane solution stored at -30 °C for 1 day. M. p. = 134.3 °C. <sup>1</sup>H NMR (600.2 MHz, C<sub>6</sub>D<sub>6</sub>): δ = 7.29 (t, *J*<sub>HH</sub> = 7.8 Hz, 1 H, C<sub>Ar</sub>), 7.15 (m, 2 H, C<sub>Ar</sub>), 7.08 ~ 7.00 (br., 7 H, C<sub>Ar</sub>), 6.96 (d, *J*<sub>HH</sub> = 7.8 Hz, 2 H, C<sub>Ar</sub>), 5.77 (br., 1 H, P-CH), 4.77 (s, 1 H, C(O)CH), 3.42 (br., 2 H, CH(CH<sub>3</sub>)<sub>2</sub>), 3.34 (m, 4 H, NCH<sub>2</sub>), 3.27 (m, 4 H, NCH<sub>2</sub>), 3.17 (m, 2 H, CH(CH<sub>3</sub>)<sub>2</sub>), 3.10 (br., 2 H, CH(CH<sub>3</sub>)<sub>2</sub>), 3.02 (m, 2 H, CH(CH<sub>3</sub>)<sub>2</sub>), 1.41 (br., 6 H, CH(CH<sub>3</sub>)<sub>2</sub>), 1.27 (br., 6 H, CH(CH<sub>3</sub>)<sub>2</sub>), 1.23 ~ 1.19 (m, 24 H, CH(CH<sub>3</sub>)<sub>2</sub>), 1.12 (d, *J*<sub>HH</sub> = 7.4 Hz, 6 H, CH(CH<sub>3</sub>)<sub>2</sub>), 1.11 (d, *J*<sub>HH</sub> = 6.8 Hz, 6 H, CH(CH<sub>3</sub>)<sub>2</sub>). <sup>13</sup>C{<sup>1</sup>H} NMR (150.8 MHz, C<sub>6</sub>D<sub>6</sub>): δ = 198.9 (m, CO), 159.0 (NCN), 157.2 (NCN), 148.4 (C<sub>Ar</sub>), 148.2 (C<sub>Ar</sub>), 147.7 (C<sub>Ar</sub>), 145.8 (C<sub>Ar</sub>), 139.2 (C<sub>Ar</sub>), 136.6 (C<sub>Ar</sub>), 135.0 (C<sub>Ar</sub>), 134.6 (C<sub>Ar</sub>), 129.6 (C<sub>Ar</sub>), 129.5 (C<sub>Ar</sub>), 129.2 (C<sub>Ar</sub>), 128.4 (C<sub>Ar</sub>), 125.0 (C<sub>Ar</sub>), 124.6 (C<sub>Ar</sub>), 124.7 (C<sub>Ar</sub>), 123.9 (C<sub>Ar</sub>), 89.4 (br., CHP), 84.6 (d, <sup>2</sup>*J*<sub>PC</sub> = 48.7 Hz, CHCO), 53.6 (NCH<sub>2</sub>), 52.0 (NCH<sub>2</sub>), 50.4 (NCH<sub>2</sub>), 49.9 (NCH<sub>2</sub>), 29.1, 29.0, 25.4, 25.3, 24.9, 24.5, 24.3, 24.0. <sup>31</sup>P{<sup>1</sup>H} NMR (242.9 MHz, C<sub>6</sub>D<sub>6</sub>): δ = 487.5 (d, <sup>1</sup>*J*<sub>PP</sub> = 529.5 Hz, CH-P=P-CO), 385.0 (d, <sup>1</sup>*J*<sub>PP</sub> = 529.5 Hz, CH-P=P-CO). UV/Vis (toluene, λ (nm) ε (M<sup>-1</sup>cm<sup>-1</sup>)): 368 (15262), 488.0 (49678). HRMS (ESI, m/z) calc. for: C<sub>57</sub>H<sub>78</sub>N<sub>4</sub>OP<sub>2</sub>: 897.5724 [M+H]<sup>+</sup>;

found: 897.5707. IR (ATR,  $\text{cm}^{-1}$ ): 2960, 2927, 2868, 1502, 1494, 1445, 1434, 1323, 1054, 1042, 803.

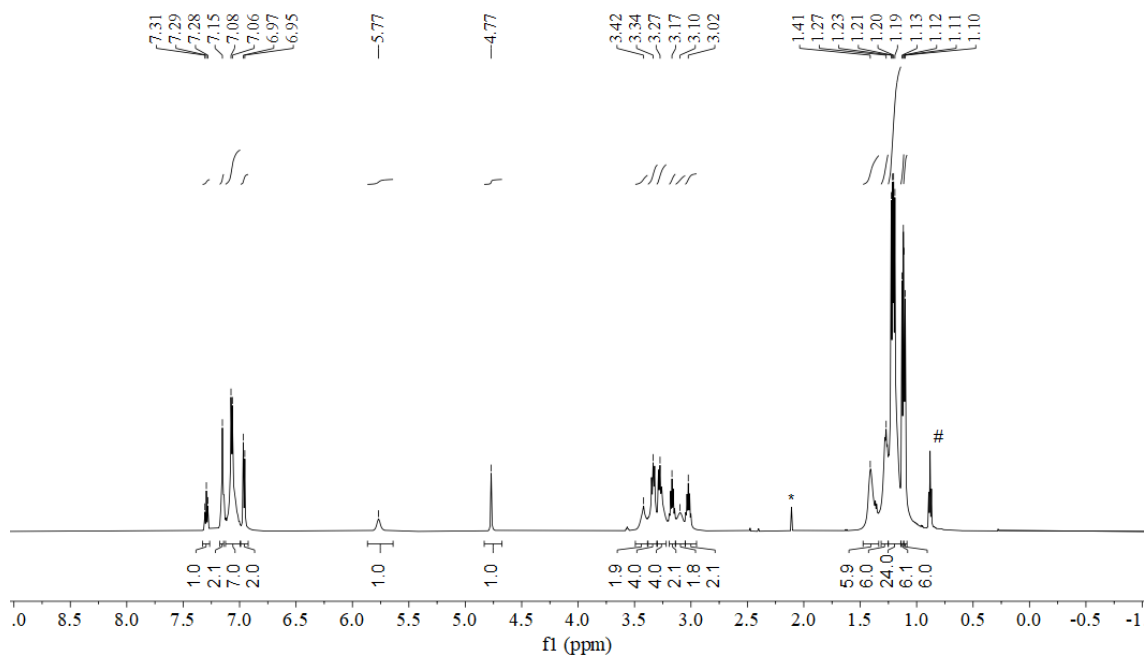

Figure S7.  $^1\text{H}$  NMR of **3a** in  $\text{C}_6\text{D}_6$ . \*Toluene, #hexane.

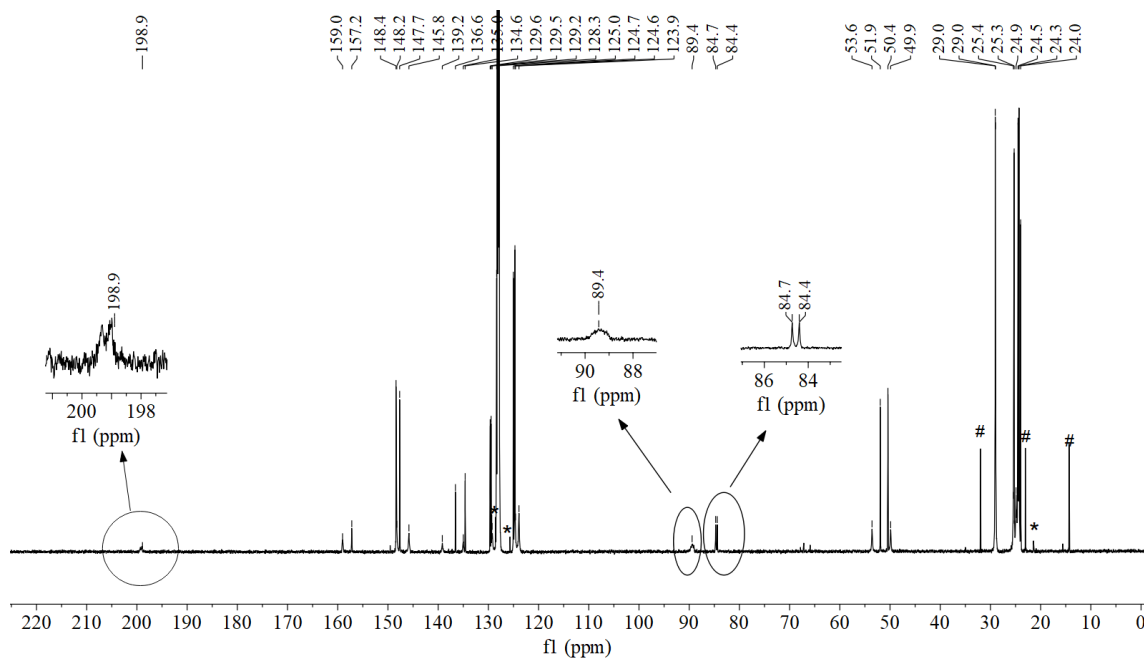

Figure S8.  $^{13}\text{C}\{^1\text{H}\}$  NMR of **3a** in  $\text{C}_6\text{D}_6$ . \*Toluene, #hexane.

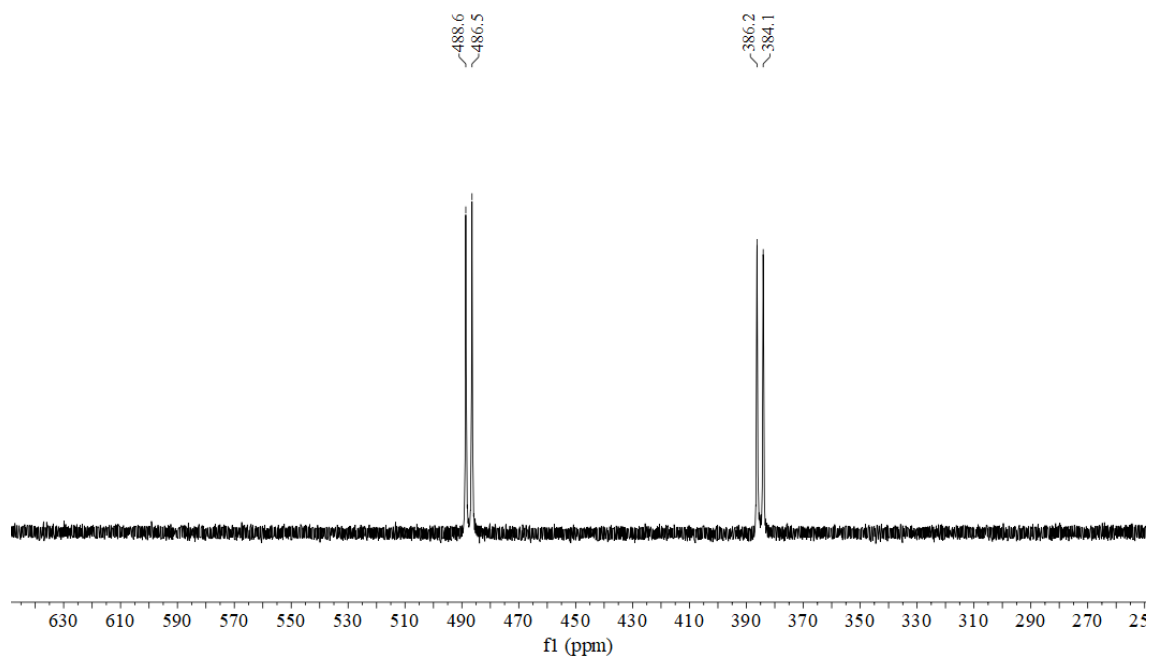

*Figure S9.*  $^{31}\text{P}\{^1\text{H}\}$  NMR of **3a** in  $\text{C}_6\text{D}_6$ .

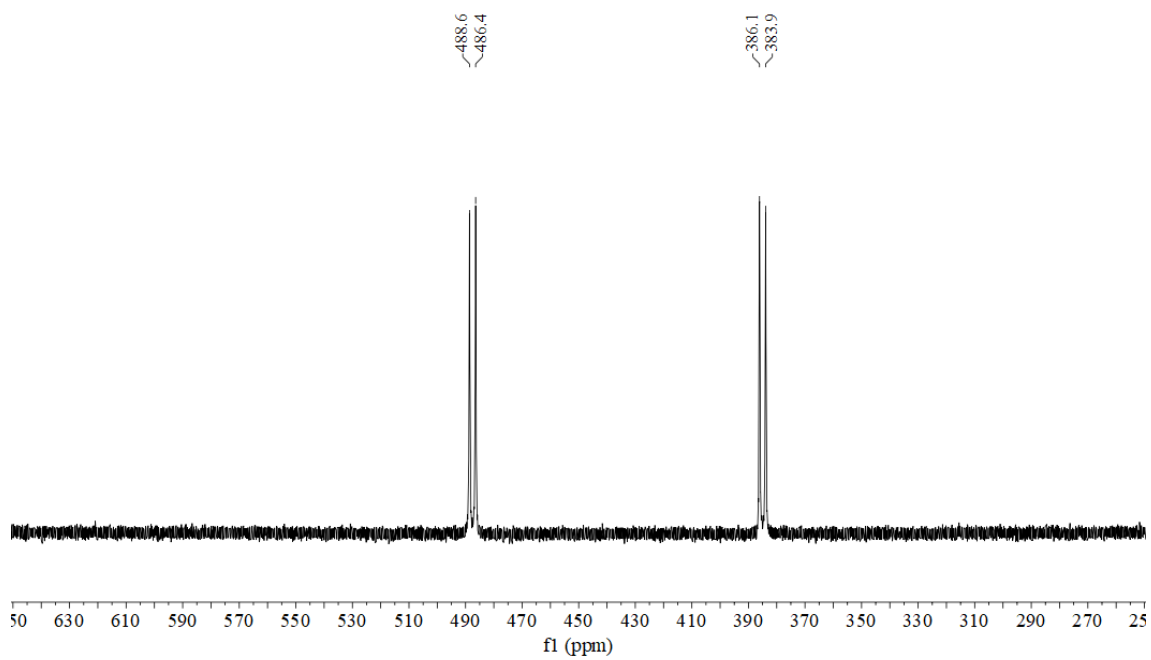

*Figure S10.*  $^{31}\text{P}$  NMR of **3a** in  $\text{C}_6\text{D}_6$ .



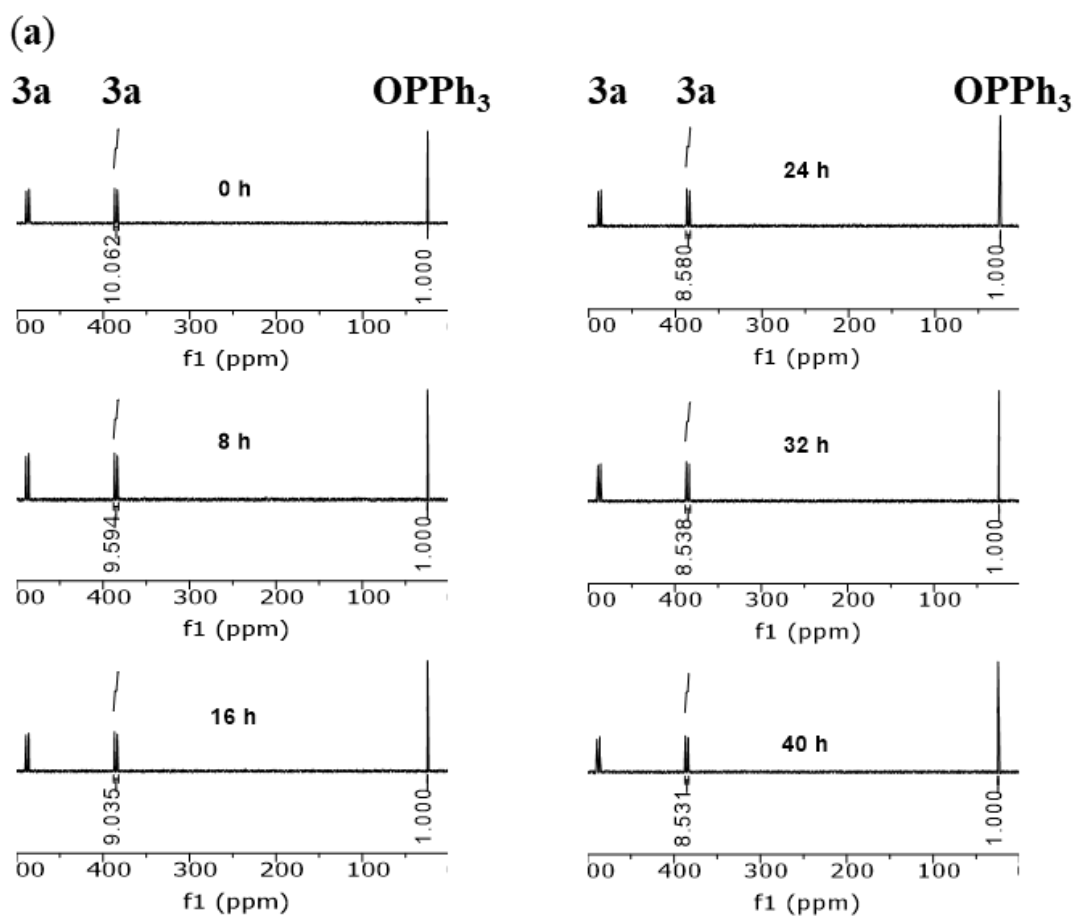

(b)

| T (h) | $\int_{3a}$ | [3a] (mol*L <sup>-1</sup> ) |
|-------|-------------|-----------------------------|
| 0     | 10.062      | 0.072                       |
| 8     | 9.594       | 0.069                       |
| 16    | 9.035       | 0.065                       |
| 24    | 8.580       | 0.062                       |
| 32    | 8.538       | 0.061                       |
| 40    | 8.531       | 0.061                       |

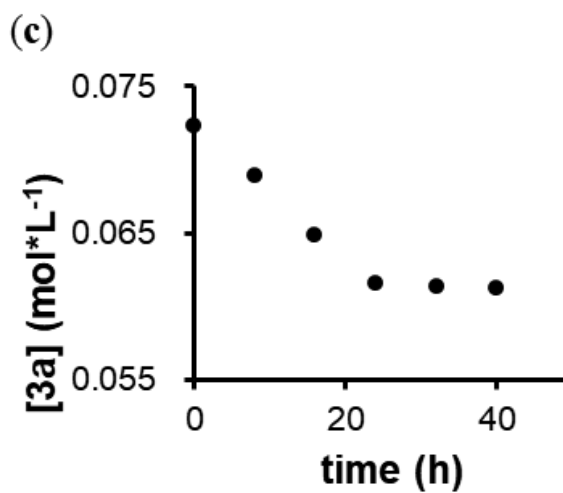

**Figure S11.** (a)  $^{31}\text{P}\{^1\text{H}\}$  NMR spectra of **3a** (internal standard  $\text{OPPh}_3$ ) over a period of 40 h in  $\text{C}_6\text{D}_6$ . (b) Table of the concentration of **3a** over a period of 40 h in  $\text{C}_6\text{D}_6$ . (c) Plot of concentration of **3a** against time in  $\text{C}_6\text{D}_6$ .

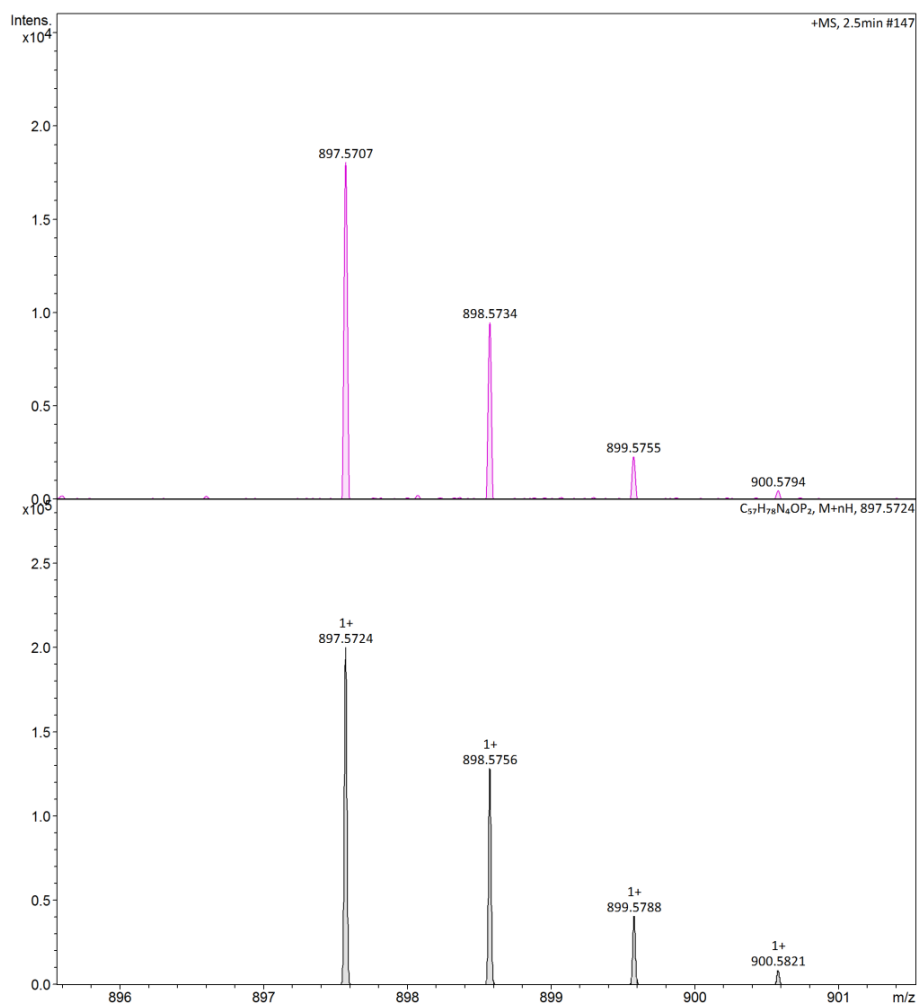

Figure S12. HRMS of 3a.

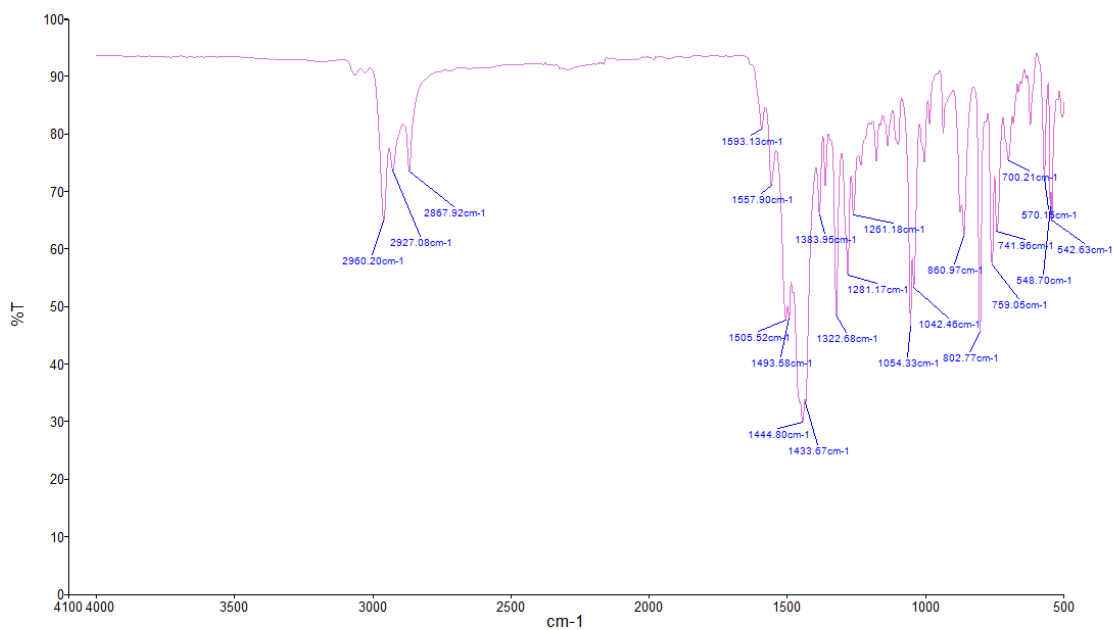

Figure S13. IR spectrum of 3a.

### Synthesis of **3a**-dimer:

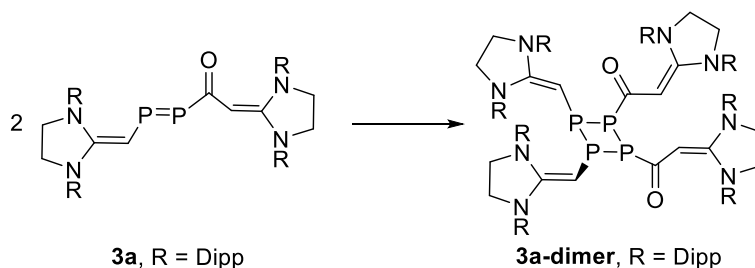

**3a** (200 mg, 0.2 mmol) in hexane (20 mL) was allowed to evaporate slowly at room temperature for 1 week. Yellow crystals were then formed and collected to afford **3a-dimer** (122 mg, yield = 61 %) as yellow crystalline materials. M. p. = 193.1 °C (Decomposition).  $^1\text{H}$  NMR (600.2 MHz,  $\text{C}_6\text{D}_6$ ):  $\delta$  = 7.45 (d,  $J$  = 7.7 Hz, 2 H,  $\text{C}_{\text{Ar}}\text{H}$ ), 7.41 (t,  $J$  = 7.5 Hz, 2 H,  $\text{C}_{\text{Ar}}\text{H}$ ), 7.37 (t,  $J$  = 7.7 Hz, 2 H,  $\text{C}_{\text{Ar}}\text{H}$ ), 7.30 (d,  $J$  = 7.7 Hz, 2 H,  $\text{C}_{\text{Ar}}\text{H}$ ), 7.26 (t,  $J$  = 7.5 Hz, 4 H,  $\text{C}_{\text{Ar}}\text{H}$ ), 7.21 (t,  $J$  = 7.7 Hz, 2 H,  $\text{C}_{\text{Ar}}\text{H}$ ), 7.14 (d,  $J$  = 7.5 Hz, 2 H,  $\text{C}_{\text{Ar}}\text{H}$ ), 7.11~7.08 (m, 2 H,  $\text{C}_{\text{Ar}}\text{H}$ ), 4.81 (s, 2 H,  $\text{CHC}(\text{O})\text{PP}$ ), 3.80 (m, 6 H,  $\text{NCH}_2$ ), 3.61 (m, 2 H,  $\text{NCH}_2$ ), 3.28 (m, 8 H,  $\text{NCH}_2$ ), 3.18 (m, 6 H,  $\text{CH}(\text{CH}_3)_2$ ), 3.13 (m, 4 H,  $\text{CH}(\text{CH}_3)_2$ ), 3.07 (m, 6 H,  $\text{CH}(\text{CH}_3)_2$ ), 2.83 (m, 2 H,  $\text{CHPP}$ ), 1.86 (d,  $J$  = 6.6 Hz, 6 H,  $\text{CH}(\text{CH}_3)_2$ ), 1.46 (d,  $J$  = 6.6 Hz, 6 H,  $\text{CH}(\text{CH}_3)_2$ ), 1.44 (d,  $J$  = 7.1 Hz, 6 H,  $\text{CH}(\text{CH}_3)_2$ ), 1.39~1.37 (m, 12 H,  $\text{CH}(\text{CH}_3)_2$ ), 1.36 (d,  $J$  = 6.6 Hz, 6 H,  $\text{CH}(\text{CH}_3)_2$ ), 1.34 (d,  $J$  = 6.6 Hz, 12 H,  $\text{CH}(\text{CH}_3)_2$ ), 1.28 (d,  $J$  = 6.9 Hz, 6 H,  $\text{CH}(\text{CH}_3)_2$ ), 1.26 (d,  $J$  = 6.8 Hz, 6 H,  $\text{CH}(\text{CH}_3)_2$ ), 1.22 (m, 12 H,  $\text{CH}(\text{CH}_3)_2$ ), 1.18 (d,  $J$  = 6.9 Hz, 6 H,  $\text{CH}(\text{CH}_3)_2$ ), 1.06 (d,  $J$  = 6.6 Hz, 6 H,  $\text{CH}(\text{CH}_3)_2$ ), 0.62 (d,  $J$  = 6.6 Hz, 6 H,  $\text{CH}(\text{CH}_3)_2$ ), 0.56 (d,  $J$  = 6.6 Hz, 6 H,  $\text{CH}(\text{CH}_3)_2$ ).  $^{13}\text{C}\{^1\text{H}\}$  NMR (150.8 MHz,  $\text{C}_6\text{D}_6$ ):  $\delta$  = 201.8 (m,  $\text{C}=\text{O}$ ), 159.4 (NCN), 156.8 (m, NCN), 150.6 ( $\text{C}_{\text{Ar}}$ ), 150.0 ( $\text{C}_{\text{Ar}}$ ), 150.0 ( $\text{C}_{\text{Ar}}$ ), 148.7 ( $\text{C}_{\text{Ar}}$ ), 147.8 ( $\text{C}_{\text{Ar}}$ ), 146.8 ( $\text{C}_{\text{Ar}}$ ), 145.6 ( $\text{C}_{\text{Ar}}$ ), 143.8 ( $\text{C}_{\text{Ar}}$ ), 141.7 ( $\text{C}_{\text{Ar}}$ ), 141.1 ( $\text{C}_{\text{Ar}}$ ), 137.2 ( $\text{C}_{\text{Ar}}$ ), 133.8 ( $\text{C}_{\text{Ar}}$ ), 128.8 ( $\text{C}_{\text{Ar}}$ ), 128.5 ( $\text{C}_{\text{Ar}}$ ), 127.4 ( $\text{C}_{\text{Ar}}$ ), 127.3 ( $\text{C}_{\text{Ar}}$ ), 127.0 ( $\text{C}_{\text{Ar}}$ ), 125.7 ( $\text{C}_{\text{Ar}}$ ), 125.2 ( $\text{C}_{\text{Ar}}$ ), 124.6 ( $\text{C}_{\text{Ar}}$ ), 124.5 ( $\text{C}_{\text{Ar}}$ ), 123.9 ( $\text{C}_{\text{Ar}}$ ), 123.9 ( $\text{C}_{\text{Ar}}$ ), 123.7 ( $\text{C}_{\text{Ar}}$ ), 80.2 (t,  $^1J_{\text{PC}} \sim ^2J_{\text{PC}} = 10.3$  Hz,  $\text{CHPP}$ ), 71.3 (m,  $\text{CHC}(\text{O})\text{P}$ ), 54.0 ( $\text{NCH}_2$ ), 51.9 ( $\text{NCH}_2$ ), 50.4 ( $\text{NCH}_2$ ), 50.3 ( $\text{NCH}_2$ ), 29.6, 28.7, 28.5, 28.4, 28.3, 28.2, 27.9, 27.9, 26.2, 26.1, 26.1, 26.0, 25.9, 25.8, 25.6, 25.4, 25.3, 24.8, 24.7, 24.6, 24.1, 23.9, 23.8, 15.6.  $^{31}\text{P}\{^1\text{H}\}$  NMR (242.9 MHz,  $\text{C}_6\text{D}_6$ ):  $\delta$  = -30.9 (br.,  $\text{C}(\text{H})\text{-PP-C}(\text{O})$ ), -43.7 (br.,  $\text{C}(\text{H})\text{-PP-C}(\text{O})$ ). UV/Vis (toluene,  $\lambda$  (nm)  $\epsilon$  ( $\text{M}^{-1}\text{cm}^{-1}$ )): 373.0 (27134), 486.0 (1872). HRMS (ESI,  $m/z$ ) calc. for:

$C_{114}H_{156}N_8O_2P_4$ : 1794.1374  $[M+H]^+$ ; found: 1794.1267. IR (ATR,  $cm^{-1}$ ): 2960, 2925, 2864, 1503, 1472, 1447, 1325, 1054, 1043, 803, 760.

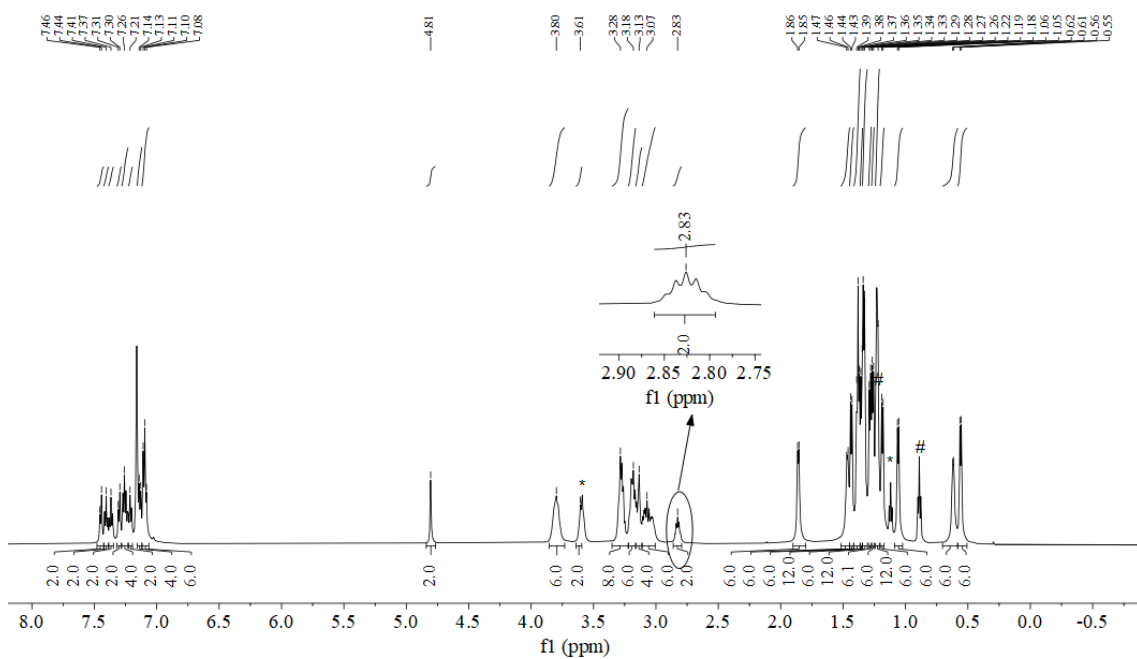

**Figure S14.**  $^1H$  NMR of **3a-dimer** in  $C_6D_6$ . #Hexane, \*tetrahydrofuran.

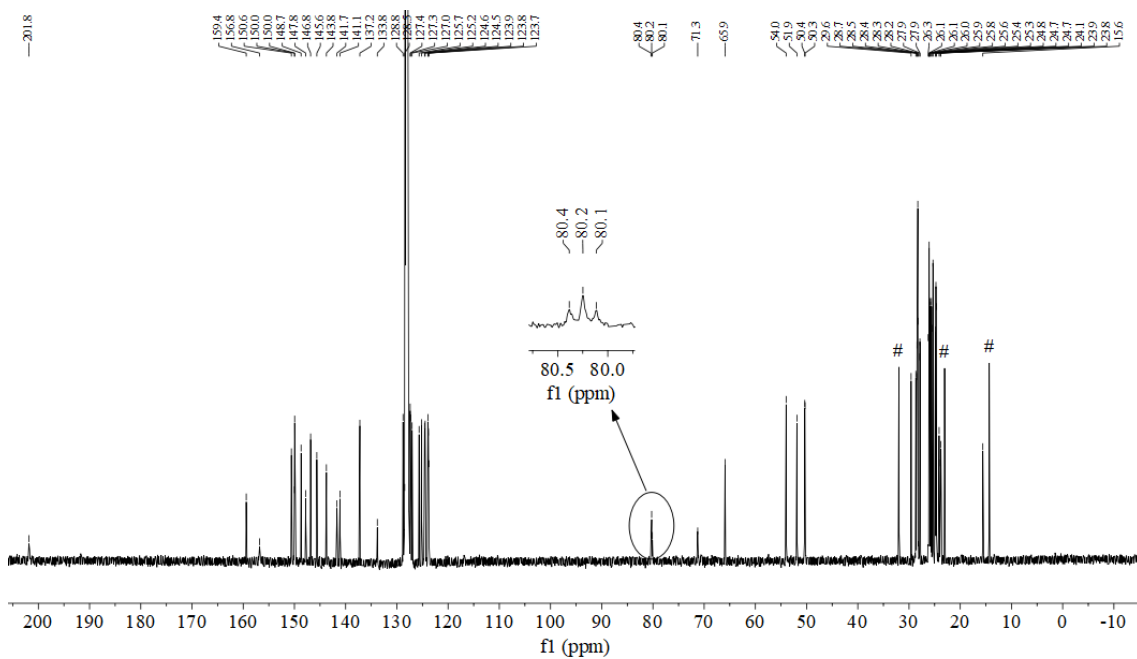

**Figure S15.**  $^{13}C\{^1H\}$  NMR of **3a-dimer** in  $C_6D_6$ . #Hexane.

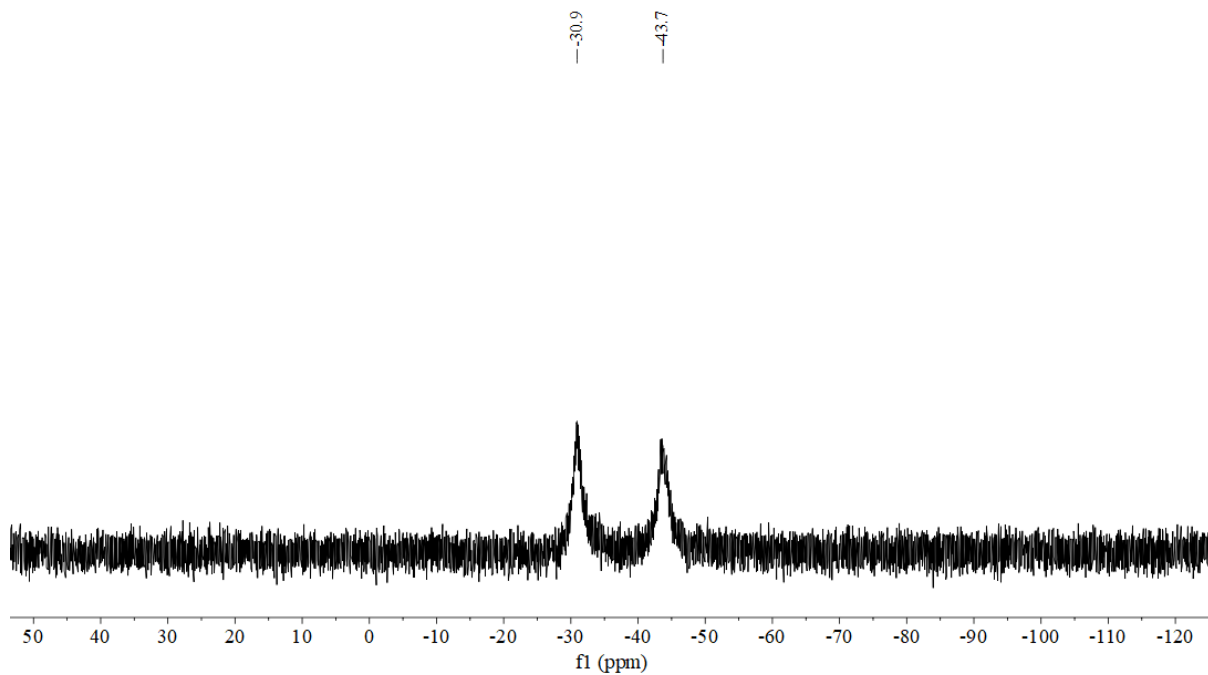

**Figure 16.**  $^{31}\text{P}\{^1\text{H}\}$  NMR of **3a-dimer** in  $\text{C}_6\text{D}_6$ .

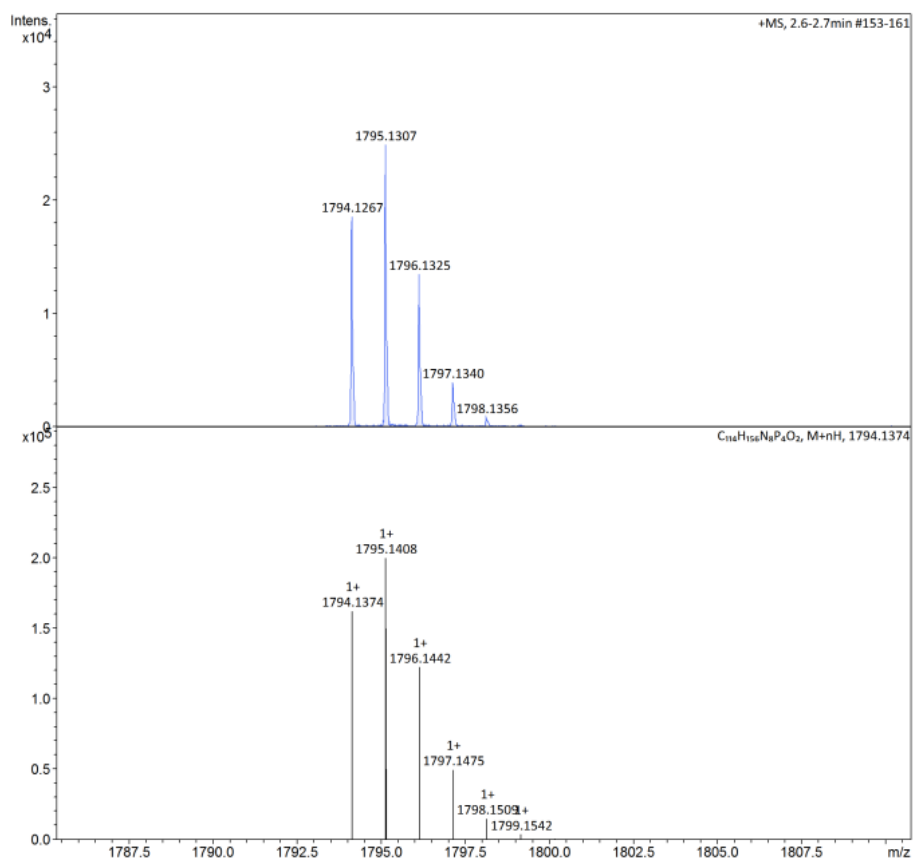

**Figure 17.** HRMS of **3a-dimer**.

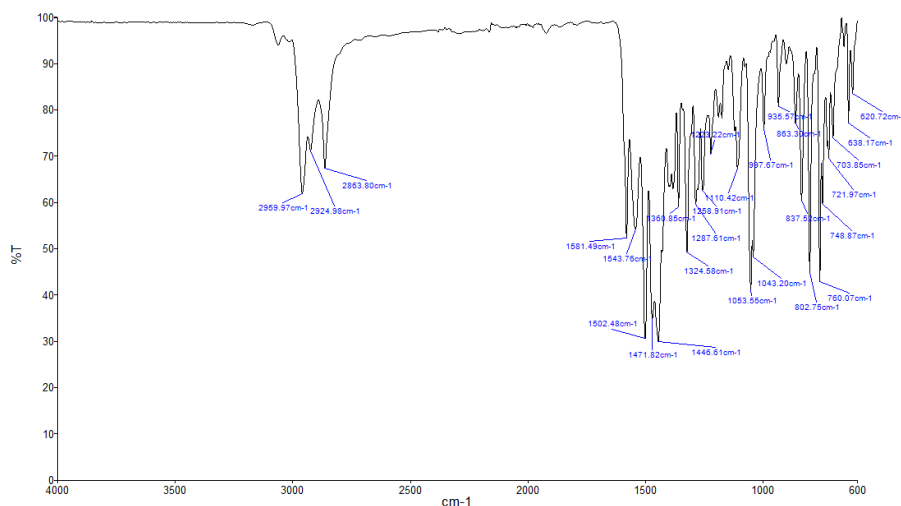

**Figure S18.** IR spectrum of **3a-dimer**.

### Synthesis of **1b**:

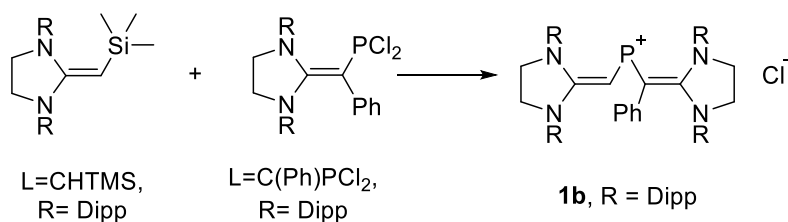

L=CHTMS (500 mg, 1.0 mmol) and L=C(Ph)PCl<sub>2</sub> (580 mg, 1.0 mmol) were mixed in toluene (20 mL) at room temperature. After stirring at 110 °C for 24 h, the solution was allowed to cool slowly to room temperature. The resulting precipitates were collected, washed with hexane (2 × 2 mL) and dried *in vacuo* to afford **1b** (721 mg, yield = 76 %) as an orange powder. M. p. > 250.0 °C. <sup>1</sup>H NMR (600.2 MHz, CD<sub>3</sub>CN): δ = 7.40 (t, *J* = 7.8 Hz, 2 H, C<sub>Ar</sub>H), 7.32 (t, *J* = 7.8 Hz, 2 H, C<sub>Ar</sub>H), 7.11 (d, *J* = 7.8 Hz, 4 H, C<sub>Ar</sub>H), 7.03 (d, *J* = 7.8 Hz, 4 H, C<sub>Ar</sub>H), 6.50 (t, *J* = 7.3 Hz, 1 H, C<sub>Ar</sub>H), 6.45 (t, *J* = 7.3 Hz, 2 H, C<sub>Ar</sub>H), 5.99 (d, *J* = 7.3 Hz, 2 H, C<sub>Ar</sub>H), 4.63 (d, <sup>2</sup>*J*<sub>PH</sub> = 12.5 Hz, 1 H, CH-P), 3.94 (s, 4 H, NCH<sub>2</sub>), 3.82 (s, 4 H, NCH<sub>2</sub>), 2.93 (m, 4 H, CH(CH<sub>3</sub>)<sub>2</sub>), 2.76 (m, 4 H, CH(CH<sub>3</sub>)<sub>2</sub>), 1.17 (d, *J* = 7.2 Hz, 12 H, CH(CH<sub>3</sub>)<sub>2</sub>), 1.14 (d, *J* = 7.2 Hz, 12 H, CH(CH<sub>3</sub>)<sub>2</sub>), 1.02 (d, *J* = 6.9 Hz, 12 H, CH(CH<sub>3</sub>)<sub>2</sub>), 0.98 (d, *J* = 6.9 Hz, 12 H, CH(CH<sub>3</sub>)<sub>2</sub>). <sup>13</sup>C {<sup>1</sup>H} NMR (150.8 MHz, CD<sub>3</sub>CN): δ = 169.3 (d, <sup>2</sup>*J*<sub>PC</sub> = 34.2 Hz, -C=CHP), 166.1 (d, <sup>2</sup>*J*<sub>PC</sub> = 25.6 Hz, -C=C(Ph)P), 147.1 (C<sub>Ar</sub>), 146.7 (C<sub>Ar</sub>), 137.7 (d, <sup>2</sup>*J*<sub>PH</sub> = 5.5 Hz, =CP-C<sub>Ar</sub>), 136.1 (C<sub>Ar</sub>), 133.4 (C<sub>Ar</sub>), 131.4 (C<sub>Ar</sub>), 130.9 (C<sub>Ar</sub>), 130.7 (C<sub>Ar</sub>), 129.2 (C<sub>Ar</sub>), 127.1 (C<sub>Ar</sub>), 126.4 (C<sub>Ar</sub>), 125.9 (C<sub>Ar</sub>),

121.9 (d,  $^1J_{PC} = 52.5$  Hz, =CHP), 103.0 (d,  $^1J_{PC} = 45.0$  Hz, =C(Ph)P), 53.6 (NCH<sub>2</sub>), 52.1 (NCH<sub>2</sub>), 29.5, 29.4, 26.3, 24.9, 24.8, 23.9.  $^{31}\text{P}\{^1\text{H}\}$  NMR (242.9 MHz, CD<sub>3</sub>CN):  $\delta = 323.3$ .  $^{31}\text{P}$  NMR (242.9 MHz, CD<sub>3</sub>CN):  $\delta = 323.2$  (d,  $^2J_{PH} = 12.5$  Hz). UV/Vis (acetonitrile,  $\lambda$  (nm)  $\epsilon$  (M<sup>-1</sup>cm<sup>-1</sup>)): 334.5 (8776), 477.0 (53152). HRMS (ESI, m/z) calc. for: C<sub>62</sub>H<sub>82</sub>N<sub>4</sub>P<sup>+</sup>: 913.6272 [M]<sup>+</sup>; found: 913.6273. IR (ATR, cm<sup>-1</sup>): 2961, 2923, 2865, 1490, 1455, 1410, 1369, 1359, 1311, 1293, 901, 803, 697.

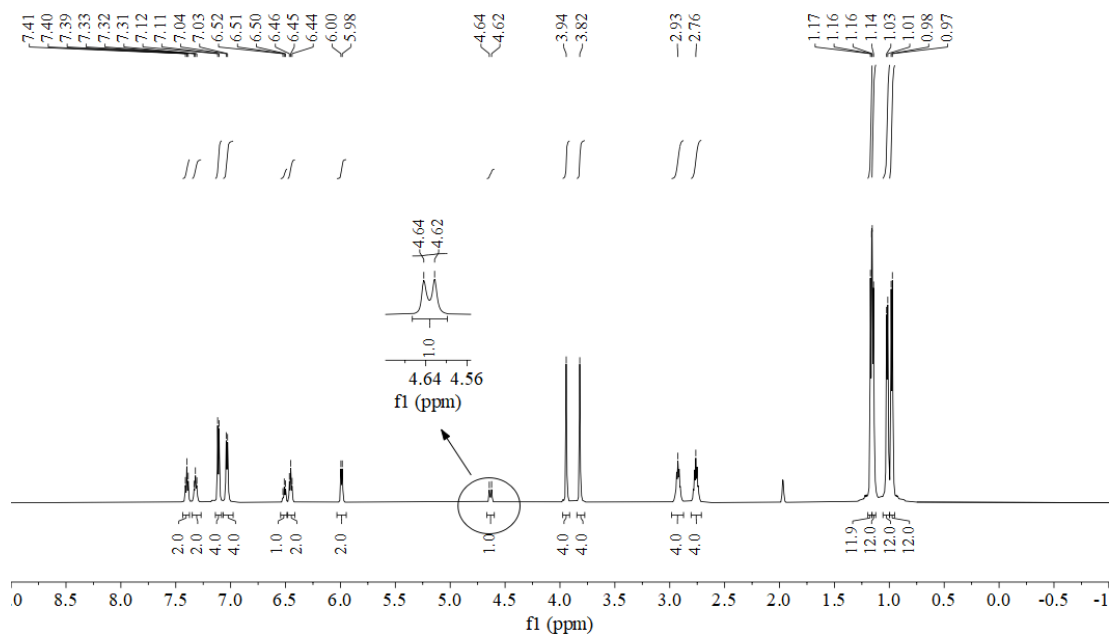

Figure S19.  $^1\text{H}$  NMR of **1b** in CD<sub>3</sub>CN.

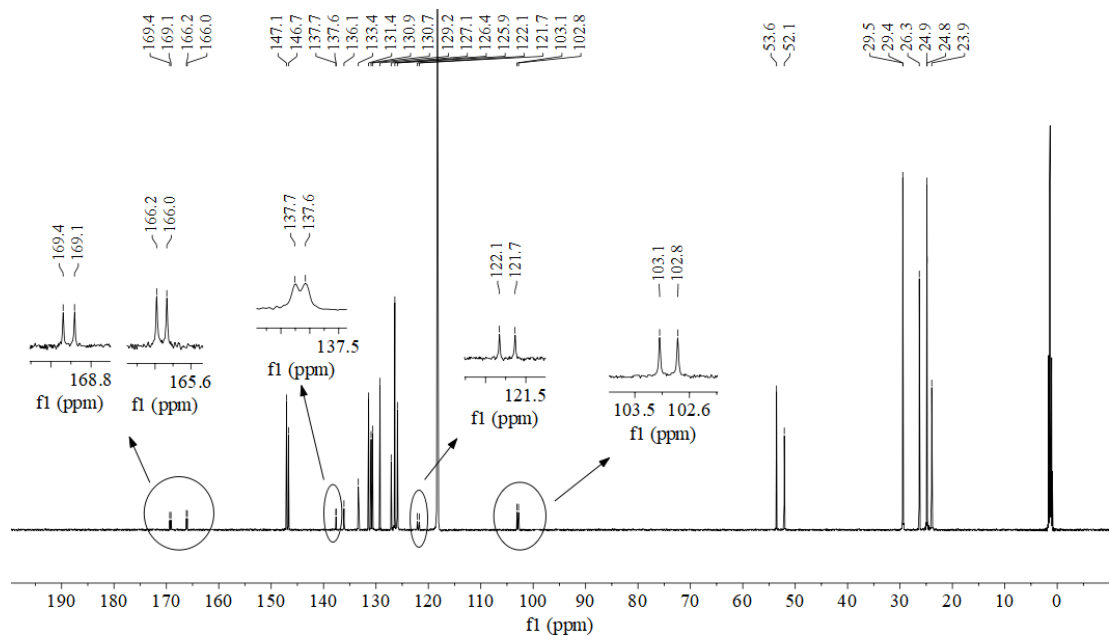

Figure S20.  $^{13}\text{C}\{^1\text{H}\}$  NMR of **1b** in CD<sub>3</sub>CN.

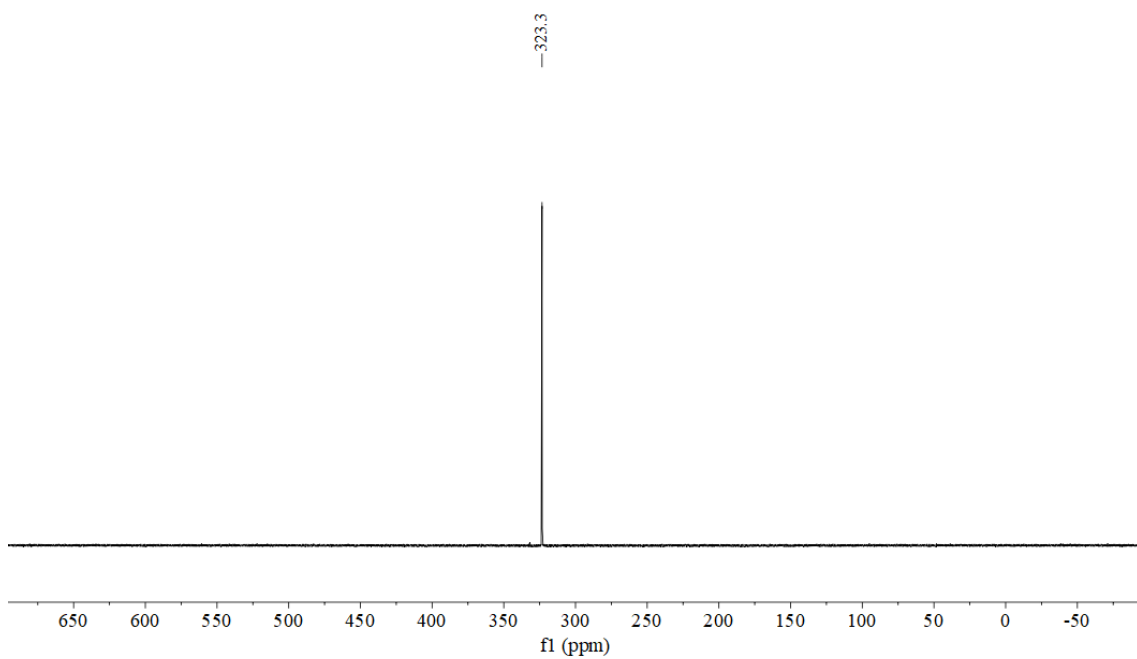

**Figure S21.**  $^{31}\text{P}\{^1\text{H}\}$  NMR of **1b** in  $\text{CD}_3\text{CN}$ .

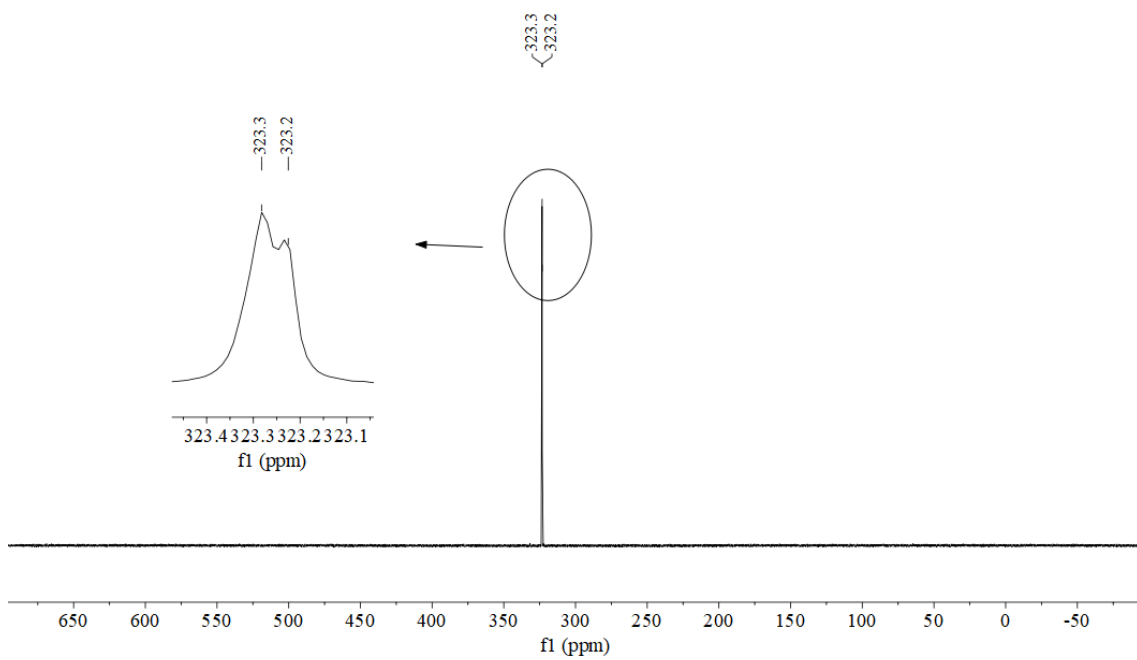

**Figure S22.**  $^{31}\text{P}$  NMR of **1b** in  $\text{CD}_3\text{CN}$ .



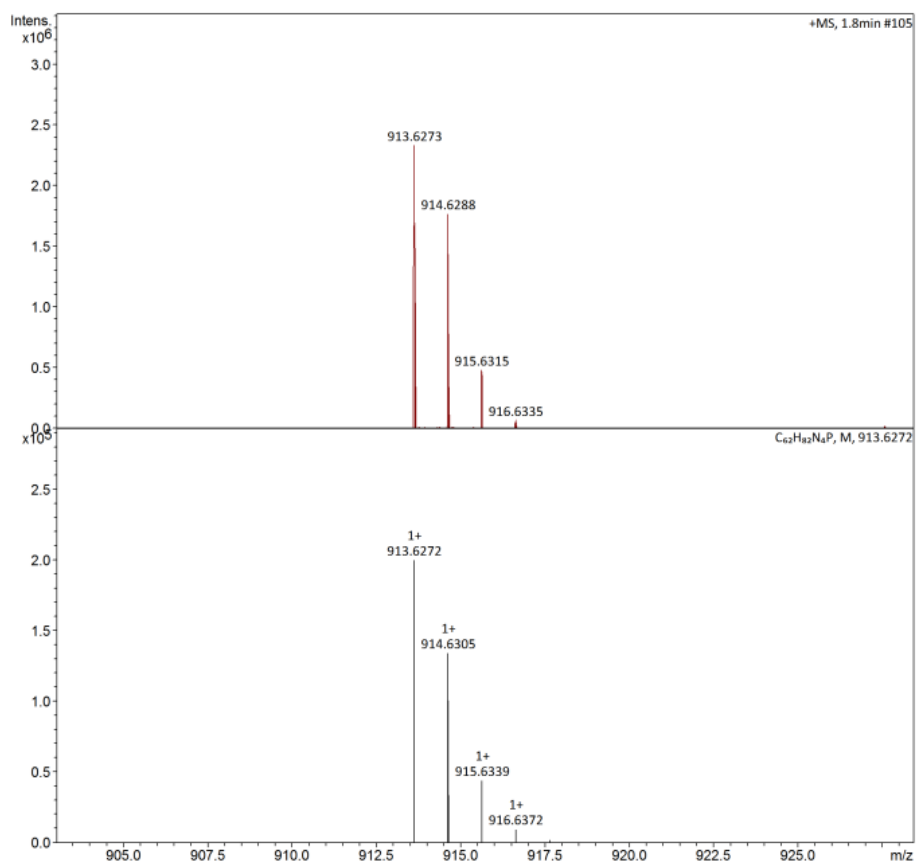

**Figure S23.** HRMS of **1b**.

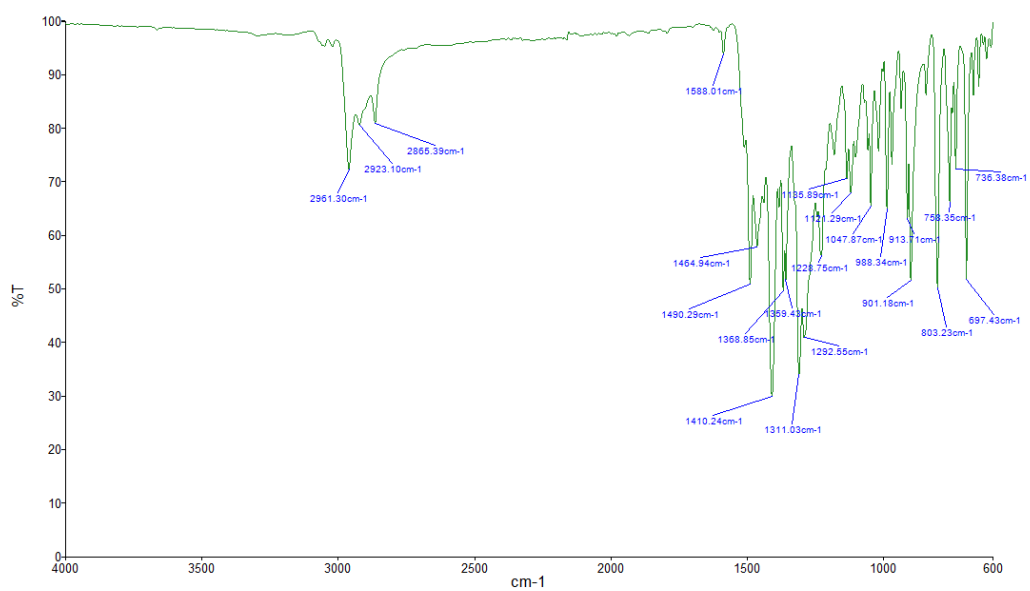

**Figure S24.** IR spectrum of **1b**.

### Synthesis of **3b**:

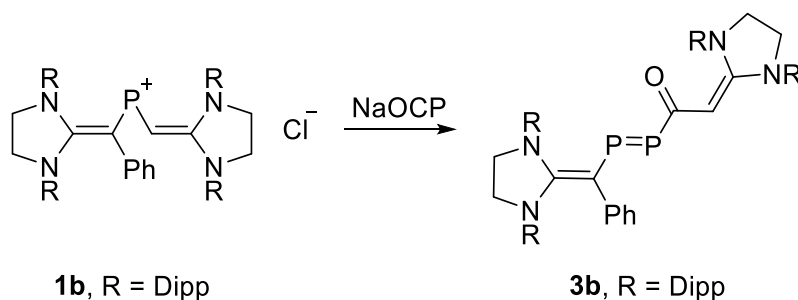

NaOCP (100 mg, 0.3 mmol) in tetrahydrofuran (10 mL) was added dropwise to a solution of **1b** (300 mg, 0.3 mmol) in a mixed solvent of acetonitrile (1 mL) and tetrahydrofuran (15 mL). After stirring for 1 hour, the solvent was removed under reduced pressure. The residue was extracted with hexane (20 mL), washed with a minimum amount of cold hexane (2 × 1 mL), and dried *in vacuo* to afford **3b** (216 mg, 74 %) as a red powder. Red crystals of **3b** were obtained from saturated hexane solution stored at -30 °C for 3 days. M. p. = 148.2 °C. <sup>1</sup>H NMR (400.1 MHz, C<sub>6</sub>D<sub>6</sub>): δ = 7.29 (br., 2 H, C<sub>Ar</sub>H), 7.11 (br., 3 H, C<sub>Ar</sub>H), 7.02 (br., 2 H, C<sub>Ar</sub>H), 6.92 (br., 3 H, C<sub>Ar</sub>H), 6.78 (br., 4 H, C<sub>Ar</sub>H), 6.64 (m., 3 H, C<sub>Ar</sub>H), 4.54 (s, 1 H, =CHC(O)), 3.40 (br., 8 H, NCH<sub>2</sub>), 3.30 (br., 2 H, CH(CH<sub>3</sub>)<sub>2</sub>), 3.21 (br., 4 H, CH(CH<sub>3</sub>)<sub>2</sub>), 2.99 (br., 2 H, CH(CH<sub>3</sub>)<sub>2</sub>), 1.41 (br., 12 H, CH(CH<sub>3</sub>)<sub>2</sub>), 1.32 (br., 12 H, CH(CH<sub>3</sub>)<sub>2</sub>), 1.20 (br., 3 H, CH(CH<sub>3</sub>)<sub>2</sub>), 1.10 (br., 12 H, CH(CH<sub>3</sub>)<sub>2</sub>), 1.02 (br., 9 H, CH(CH<sub>3</sub>)<sub>2</sub>). <sup>13</sup>C{<sup>1</sup>H} NMR (150.8 MHz, C<sub>6</sub>D<sub>6</sub>): δ = 198.3 (m, PPCO), 159.6 (m, NCN), 157.0 (m, NCN), 148.0 (C<sub>Ar</sub>), 147.2 (C<sub>Ar</sub>), 145.7 (C<sub>Ar</sub>), 144.3 (C<sub>Ar</sub>), 139.2 (m, C<sub>Ar</sub>-CHPP), 134.8 (C<sub>Ar</sub>), 130.7 (C<sub>Ar</sub>), 129.3 (C<sub>Ar</sub>), 129.0 (C<sub>Ar</sub>), 124.7 (C<sub>Ar</sub>), 124.5 (C<sub>Ar</sub>), 123.9 (C<sub>Ar</sub>), 110.8 (m, CHPP), 86.6 (d, <sup>2</sup>J<sub>PC</sub> = 70.8 Hz, PPCOCH), 53.6 (NCH<sub>2</sub>), 52.5 (NCH<sub>2</sub>), 52.0 (NCH<sub>2</sub>), 49.8 (NCH<sub>2</sub>), 29.3, 29.1, 28.8, 28.6, 26.6, 25.8, 25.4, 24.7, 24.5, 24.4, 23.6, 22.7. <sup>31</sup>P NMR (242.9 MHz, C<sub>6</sub>D<sub>6</sub>): δ = 525.5 (d, <sup>1</sup>J<sub>PP</sub> = 515.9 Hz, C(Ph)-P), 376.7 (d, <sup>1</sup>J<sub>PP</sub> = 515.9 Hz, C(O)-P). UV/Vis (toluene, λ (nm) ε (M<sup>-1</sup>cm<sup>-1</sup>)): 317.5 (17369), 495.5(19943). HRMS (ESI, m/z) calc. for: C<sub>57</sub>H<sub>78</sub>N<sub>4</sub>OP<sub>2</sub>C<sub>6</sub>H<sub>4</sub>: 973.6037 [M+H]<sup>+</sup>; found: 973.6038. IR (ATR, cm<sup>-1</sup>): 3063, 2962, 2927, 2868, 1505, 1461, 1058, 800.

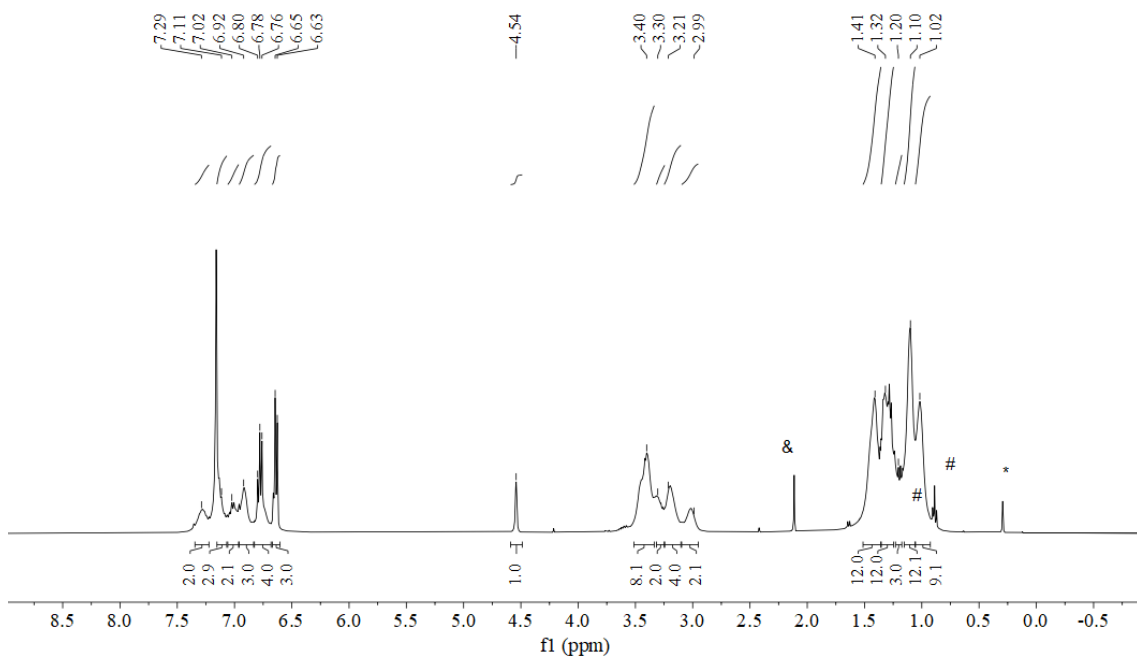

**Figure S25.**  $^1\text{H}$  NMR of **3b** in  $\text{C}_6\text{D}_6$ . \*Silicone grease, #hexane, &toluene.

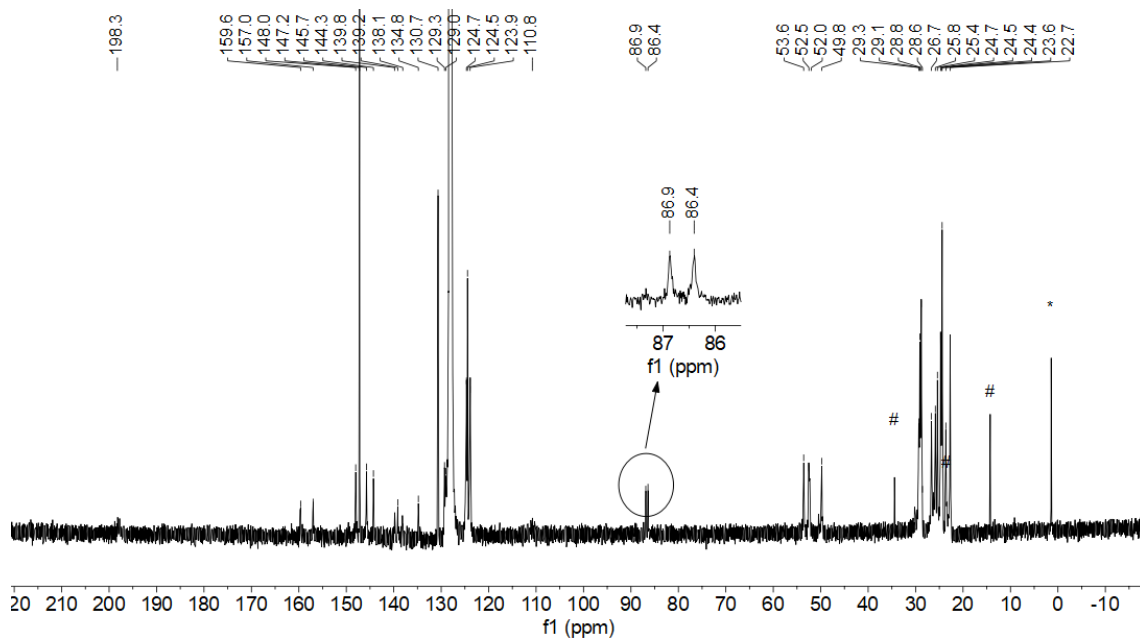

**Figure S26.**  $^{13}\text{C}\{^1\text{H}\}$  NMR of **3b** in  $\text{C}_6\text{D}_6$ . \*Silicone grease, #hexane.

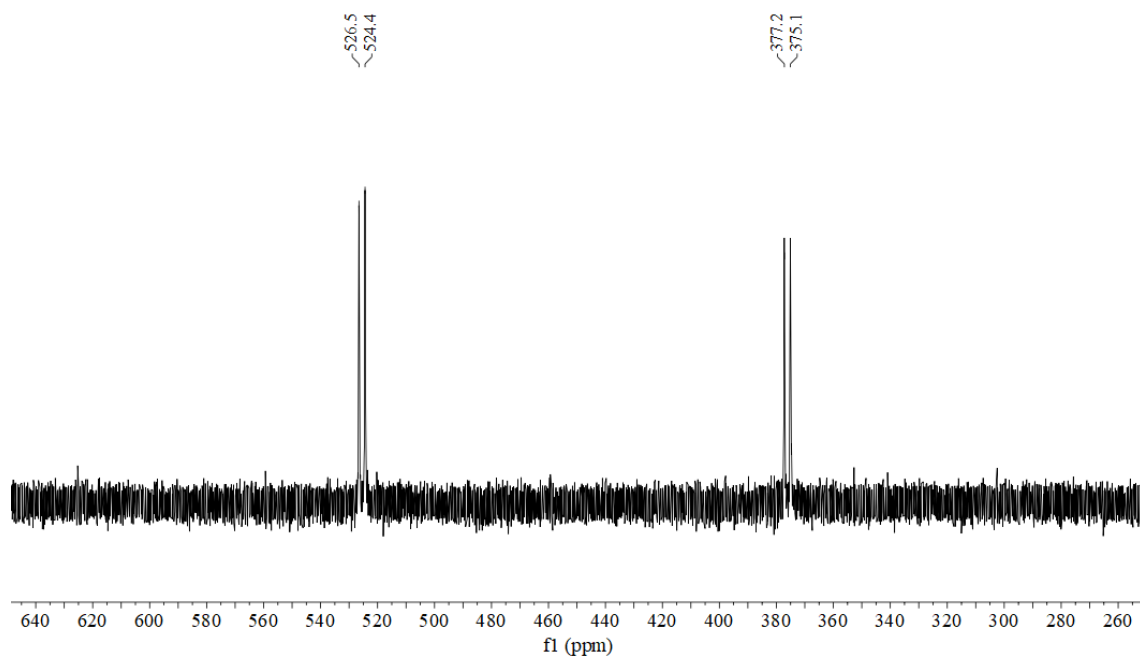

**Figure S27.**  $^{31}\text{P}\{^1\text{H}\}$  NMR of **3b** in  $\text{C}_6\text{D}_6$ .

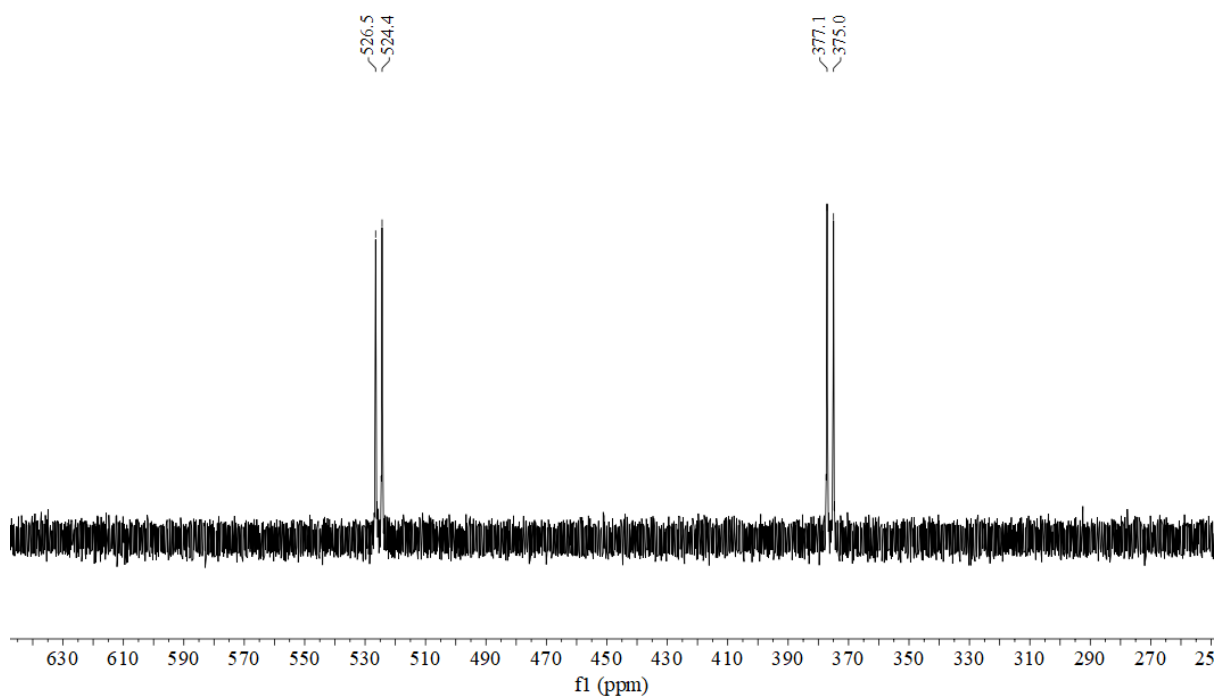

**Figure S28.**  $^{31}\text{P}$  NMR of **3b** in  $\text{C}_6\text{D}_6$ .

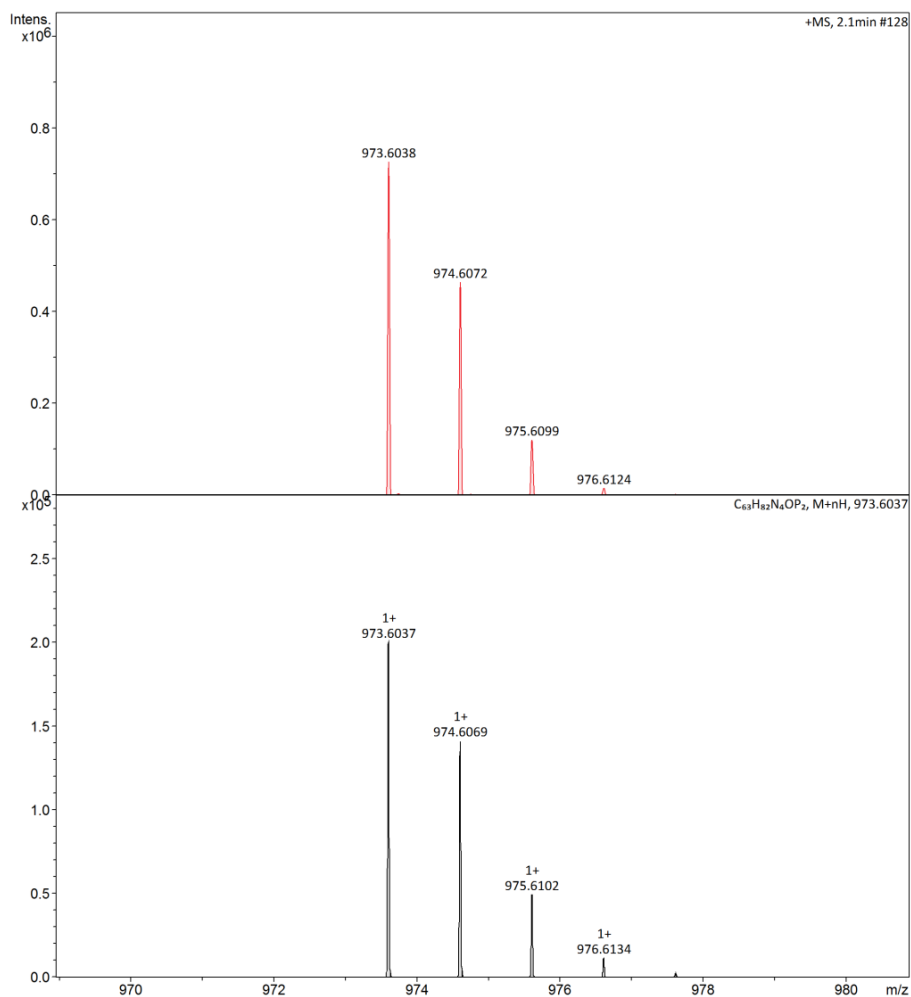

**Figure S29.** HRMS of **3b**.

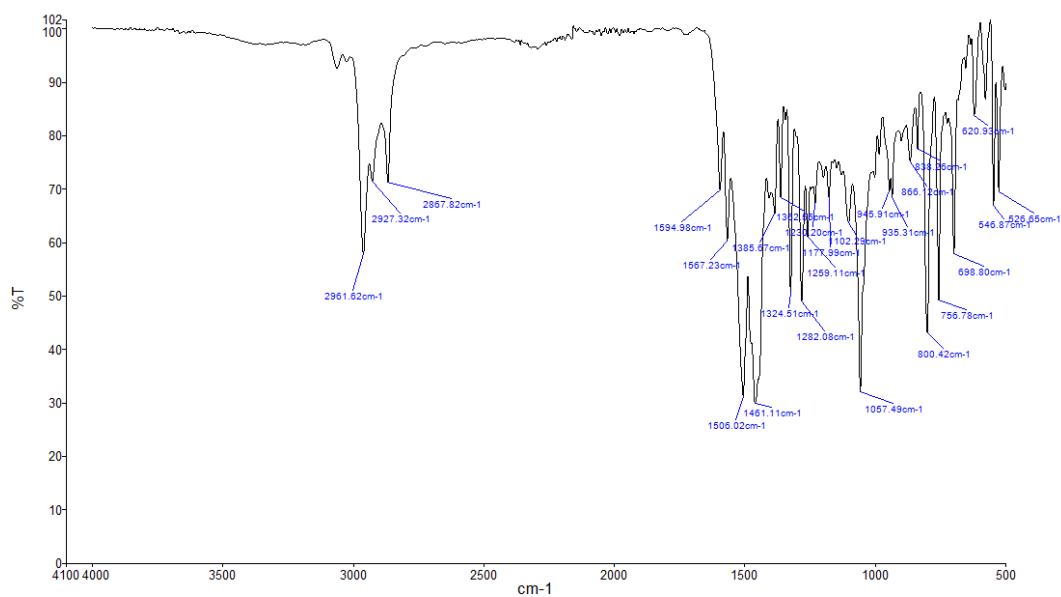

**Figure S30.** IR spectrum of **3b**.

## Synthesis of 4:

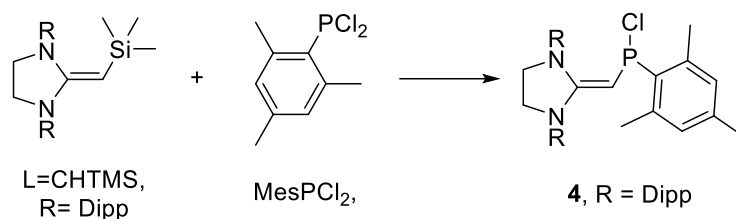

L=CHTMS (476 mg, 1 mmol) and MesPCL<sub>2</sub> (220 mg, 1 mmol) were mixed in tetrahydrofuran (20 mL) at room temperature. After stirring at room temperature overnight, the solvent was removed under reduced pressure. The residue was extracted with hexane (20 mL), washed with a minimum amount of acetonitrile (2 × 1 mL), and dried *in vacuo* to afford **4** (531 mg, 90 %) as a white powder (7 % impurity). M. p. = 132.1 °C. <sup>1</sup>H NMR (400.1 MHz, C<sub>6</sub>D<sub>6</sub>) δ 7.30-7.29 (m, 2 H, C<sub>Ar</sub>H), 7.18 (d, *J* = 7.4 Hz, 1 H, C<sub>Ar</sub>H), 7.14-7.12 (m, 2 H, C<sub>Ar</sub>H), 7.00 (d, *J* = 7.1 Hz, 1 H, C<sub>Ar</sub>H), 6.53 (s, 2 H, <sup>Mes</sup>H), 4.42 (d, <sup>2</sup>J<sub>PH</sub> = 3.5 Hz, 1 H, PCH), 3.66 (m, 1 H, CH(CH<sub>3</sub>)<sub>2</sub>), 3.62 (m, 1 H, CH(CH<sub>3</sub>)<sub>2</sub>), 3.33 (m, 4 H, NCH<sub>2</sub>), 3.18 (m, 1 H, CH(CH<sub>3</sub>)<sub>2</sub>), 3.01 (m, 1 H, CH(CH<sub>3</sub>)<sub>2</sub>), 2.40 (s, 6 H, <sup>mMes</sup>CH<sub>3</sub>), 1.89 (s, 3 H, <sup>PMes</sup>CH<sub>3</sub>), 1.81 (d, *J* = 6.9 Hz, 3 H, CH(CH<sub>3</sub>)<sub>2</sub>), 1.58 (d, *J* = 6.7 Hz, 3 H, CH(CH<sub>3</sub>)<sub>2</sub>), 1.28 (d, *J* = 6.9 Hz, 3 H, CH(CH<sub>3</sub>)<sub>2</sub>), 1.20 (d, *J* = 6.7 Hz, 3 H, CH(CH<sub>3</sub>)<sub>2</sub>), 1.17-1.14 (m, 6 H, CH(CH<sub>3</sub>)<sub>2</sub>), 1.09 (d, *J* = 6.9 Hz, CH(CH<sub>3</sub>)<sub>2</sub>), 1.01 (d, *J* = 6.9 Hz, CH(CH<sub>3</sub>)<sub>2</sub>). <sup>13</sup>C {<sup>1</sup>H} NMR (150.8 MHz, C<sub>6</sub>D<sub>6</sub>): δ = 163.4 (d, <sup>2</sup>J<sub>PC</sub> = 36.8 Hz, NCN), 149.0 (d, <sup>1</sup>J<sub>PC</sub> = 9.5 Hz, PC<sub>Ar</sub>), 148.5 (C<sub>Ar</sub>), 146.6 (C<sub>Ar</sub>), 138.7 (C<sub>Ar</sub>), 136.7 (d, <sup>1</sup>J<sub>PC</sub> = 38.3 Hz, P-C<sub>Ar</sub>), 134.4 (C<sub>Ar</sub>), 130.0 (C<sub>Ar</sub>), 129.6 (C<sub>Ar</sub>), 129.3 (C<sub>Ar</sub>), 125.3 (C<sub>Ar</sub>), 125.1 (d, <sup>1</sup>J<sub>PC</sub> = 12.9 Hz, P-<sup>m</sup>C<sub>Ar</sub>), 124.6 (C<sub>Ar</sub>), 66.3 (d, <sup>1</sup>J<sub>PC</sub> = 42.6 Hz, PCH), 52.3 (NCH<sub>2</sub>), 49.9 (NCH<sub>2</sub>), 29.4, 29.0, 28.8 (d, <sup>3</sup>J<sub>PC</sub> = 12.5 Hz, <sup>o</sup>C<sub>Ar</sub>-CH<sub>3</sub>), 26.1, 25.7, 25.0, 24.9, 24.7, 24.4, 24.0, 23.4, 22.9, 22.7, 20.9. <sup>31</sup>P {<sup>1</sup>H} NMR (161.9 MHz, C<sub>6</sub>D<sub>6</sub>): δ = 96.3. HRMS (ESI, m/z) calc. for: C<sub>37</sub>H<sub>50</sub>N<sub>2</sub>PCl: 589.3473 [M + H]<sup>+</sup>; found: 589.3495.

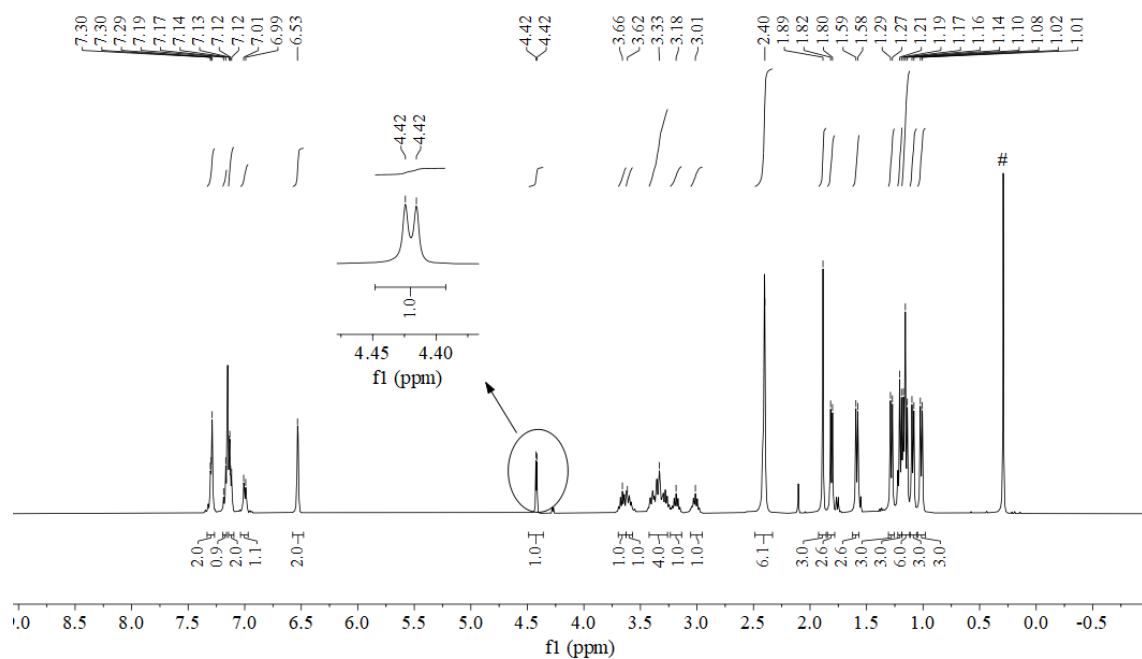

**Figure S31.**  $^1\text{H}$  NMR of **4** in  $\text{C}_6\text{D}_6$ .

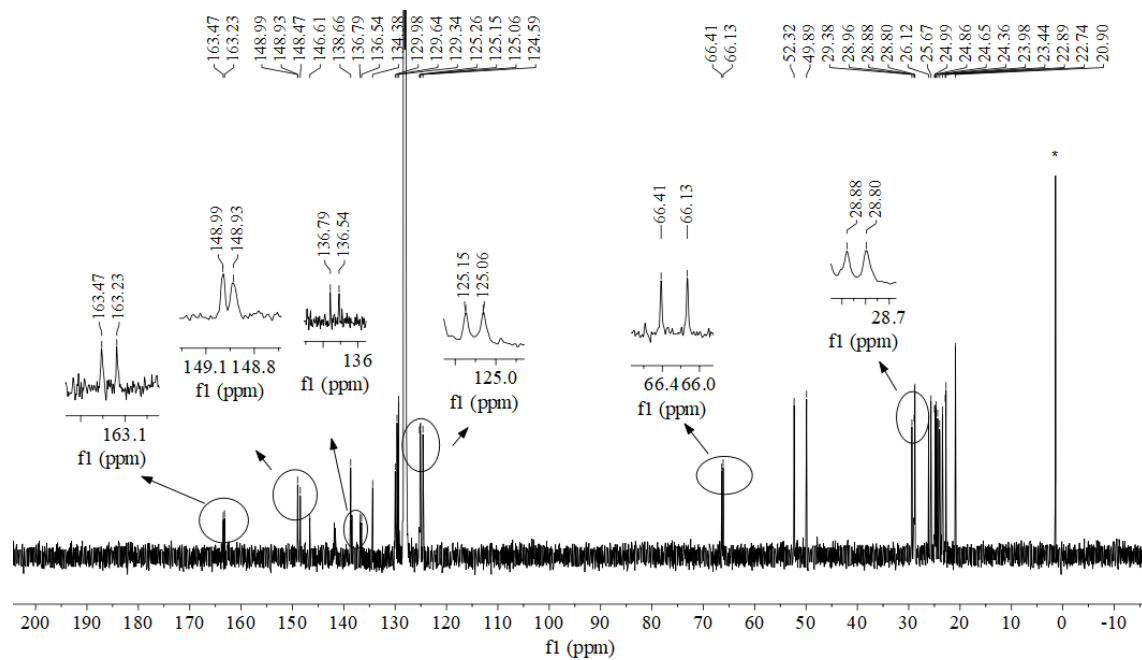

**Figure S32**  $^{13}\text{C}\{^1\text{H}\}$  NMR of **4** in  $\text{C}_6\text{D}_6$ .

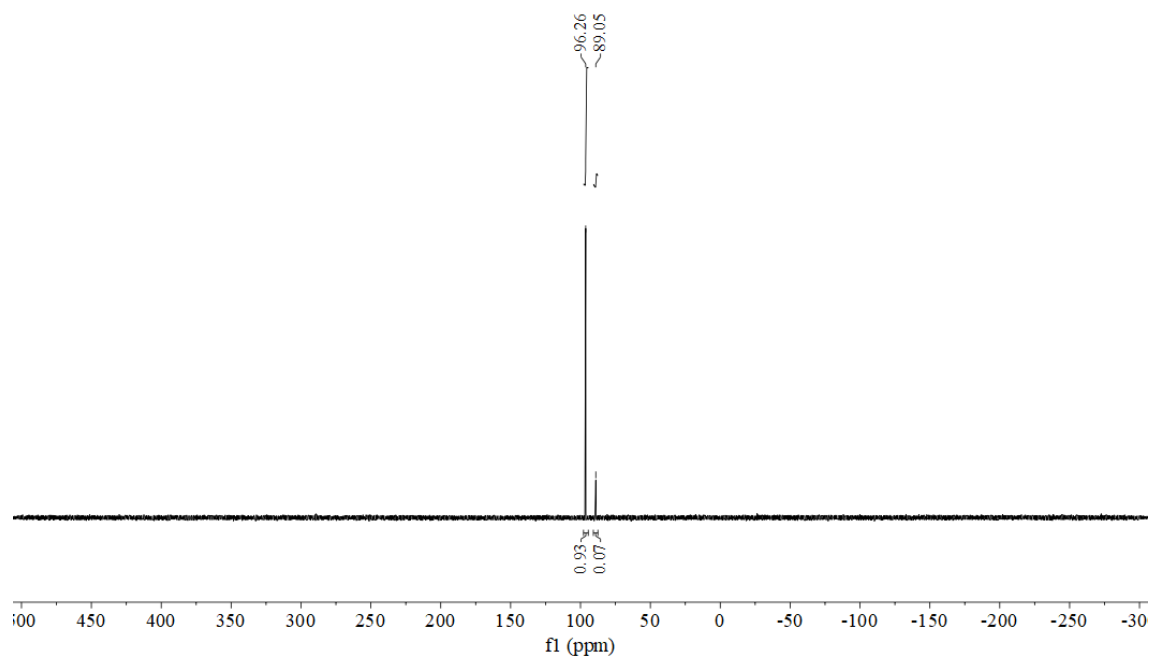

**Figure S33.** <sup>31</sup>P{<sup>1</sup>H} NMR of **4** in C<sub>6</sub>D<sub>6</sub>.

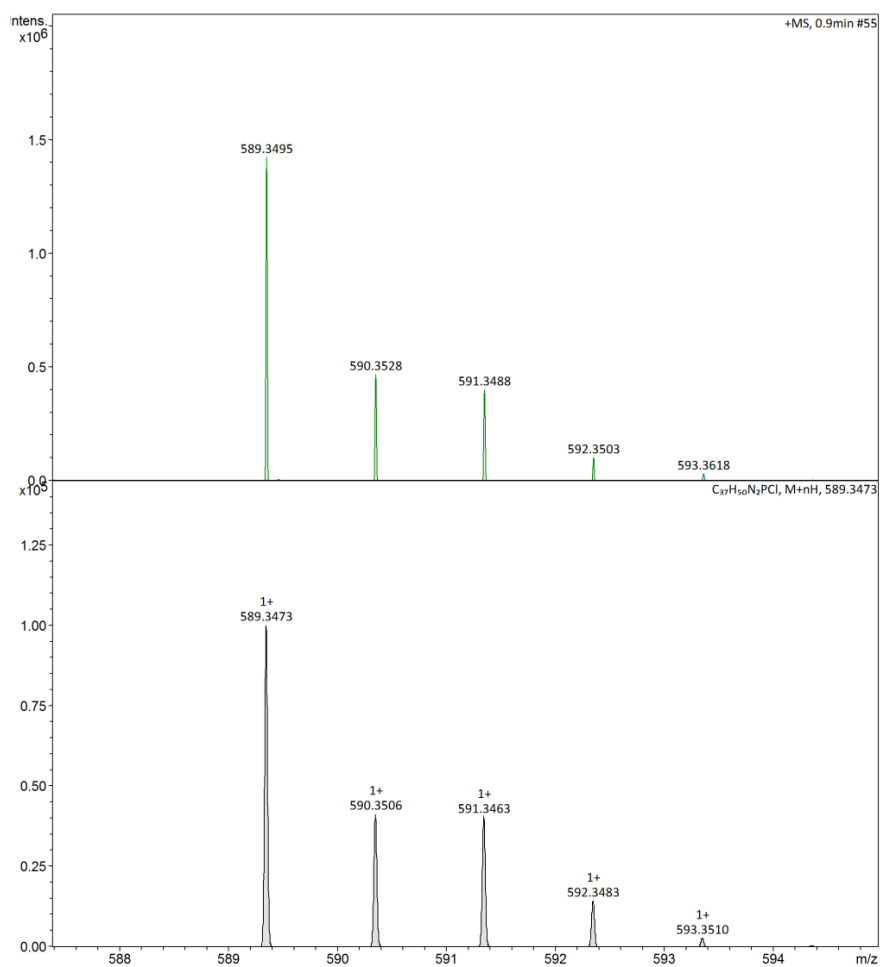

**Figure S34.** HRMS of **4**.



## Synthesis of 5:

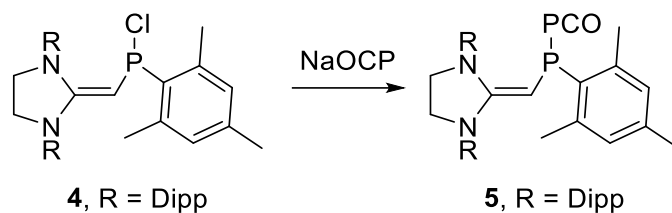

NaOCP (150 mg, 0.5 mmol) was added in several portions to a toluene (16 mL) solution of **4** (280 mg, 0.5 mmol). After stirred for 1 hour, the remaining precipitate was filtered off and solvent was removed under reduced pressure. The remaining residue was washed with a minimum amount of acetonitrile (1 mL) and dried *in vacuo* to afford **5** (169 mg, 55 %) as a white powder. M. p. = 129.6 °C (Decomposition).  $^1\text{H}$  NMR (600.2 MHz,  $\text{C}_6\text{D}_6$ ):  $\delta$  = 7.27~7.25 (m, 2 H,  $\text{C}_{\text{Ar}}\text{H}$ ), 7.18 (t,  $J$  = 7.7 Hz, 1 H,  $\text{C}_{\text{Ar}}\text{H}$ ), 7.13 (d,  $J$  = 7.1 Hz, 1 H,  $\text{C}_{\text{Ar}}\text{H}$ ), 7.06 (d,  $J$  = 7.8 Hz, 1 H,  $\text{C}_{\text{Ar}}\text{H}$ ), 7.03 (d,  $J$  = 7.1 Hz, 1 H,  $\text{C}_{\text{Ar}}\text{H}$ ), 6.54 (s, 2 H,  $^{\text{Mes}}\text{C}_{\text{Ar}}\text{H}$ ), 3.78 (m, 1 H, PCH), 3.61 (m, 1 H,  $\text{CH}(\text{CH}_3)_2$ ), 3.57 (m, 1 H,  $\text{CH}(\text{CH}_3)_2$ ), 3.37 (m, 2 H, NCH<sub>2</sub>), 3.29 (m, 2 H, NCH<sub>2</sub>), 3.22 (m, 1 H,  $\text{CH}(\text{CH}_3)_2$ ), 3.16 (m, 1 H,  $\text{CH}(\text{CH}_3)_2$ ), 2.23 (s, 6 H,  $\text{C}_{\text{Ar}}\text{CH}_3$ ), 1.93 (s, 3 H,  $\text{C}_{\text{Ar}}\text{CH}_3$ ), 1.73 (d,  $J$  = 6.9 Hz, 3 H,  $\text{CH}(\text{CH}_3)_2$ ), 1.54 (d,  $J$  = 6.7 Hz, 3 H,  $\text{CH}(\text{CH}_3)_2$ ), 1.28 (d,  $J$  = 6.9 Hz, 3 H,  $\text{CH}(\text{CH}_3)_2$ ), 1.20 (d,  $J$  = 6.9 Hz, 3 H,  $\text{CH}(\text{CH}_3)_2$ ), 1.17 (d,  $J$  = 6.9 Hz, 3 H,  $\text{CH}(\text{CH}_3)_2$ ), 1.14 (d,  $J$  = 6.8 Hz, 3 H,  $\text{CH}(\text{CH}_3)_2$ ), 1.11 (d,  $J$  = 6.9 Hz, 3 H,  $\text{CH}(\text{CH}_3)_2$ ), 0.93 (d,  $J$  = 6.8 Hz, 3 H,  $\text{CH}(\text{CH}_3)_2$ ).  $^{13}\text{C}\{^1\text{H}\}$  NMR (150.8 MHz,  $\text{C}_6\text{D}_6$ ):  $\delta$  = 201.1 (dd,  $^1J_{\text{PC}}$  = 113.8 Hz,  $^2J_{\text{PC}}$  = 20.7 Hz, C(O)), 160.4 (dd,  $^2J_{\text{PC}}$  = 40.4 Hz,  $^3J_{\text{PC}}$  = 3.3 Hz, NCN), 149.1 ( $\text{C}_{\text{Ar}}$ ), 148.9 ( $\text{C}_{\text{Ar}}$ ), 148.7 (d,  $J_{\text{PH}}$  = 3.5 Hz, P- $\text{C}_{\text{Ar}}$ ), 146.9 ( $\text{C}_{\text{Ar}}$ ), 142.0 ( $\text{C}_{\text{Ar}}$ ), 141.9 ( $\text{C}_{\text{Ar}}$ ), 139.2 (d,  $J_{\text{PH}}$  = 3.6 Hz, P- $\text{C}_{\text{Ar}}$ ), 137.5 (dd,  $^1J_{\text{PH}}$  = 32.6 Hz,  $^2J_{\text{PH}}$  = 11.5 Hz, P- $\text{C}_{\text{Ar}}$ ), 135.3 ( $\text{C}_{\text{Ar}}$ ), 129.8 ( $\text{C}_{\text{Ar}}$ ), 129.4 ( $\text{C}_{\text{Ar}}$ ), 128.9 ( $\text{C}_{\text{Ar}}$ ), 128.4 ( $\text{C}_{\text{Ar}}$ ), 125.1 ( $\text{C}_{\text{Ar}}$ ), 125.0 ( $\text{C}_{\text{Ar}}$ ), 124.4 ( $\text{C}_{\text{Ar}}$ ), 61.1 (dd,  $^1J_{\text{PC}}$  = 25.7 Hz,  $^2J_{\text{PC}}$  = 13.6 Hz, PP-CH=), 52.3 (NCH<sub>2</sub>), 49.9 (NCH<sub>2</sub>), 29.5, 28.8, 28.6, 25.8, 25.7, 25.1, 24.9, 24.7, 24.2, 23.7, 23.6, 23.6, 23.5, 22.7.  $^{31}\text{P}\{^1\text{H}\}$  NMR (242.9 MHz,  $\text{C}_6\text{D}_6$ ):  $\delta$  = -41.0 (-PPCO,  $^1J_{\text{PP}}$  = 170.9 Hz), -248.6 (-PPCO,  $^1J_{\text{PP}}$  = 170.9 Hz). HRMS (ESI, m/z) calc. for:  $(\text{C}_{38}\text{H}_{50}\text{N}_2\text{P}_2\text{O})_2$ : 1225.6870 [M + H]<sup>+</sup>; found: 1225.6834. IR (ATR,  $\text{cm}^{-1}$ ): 2964, 1929 (CO), 1535, 1455, 873, 806, 703.



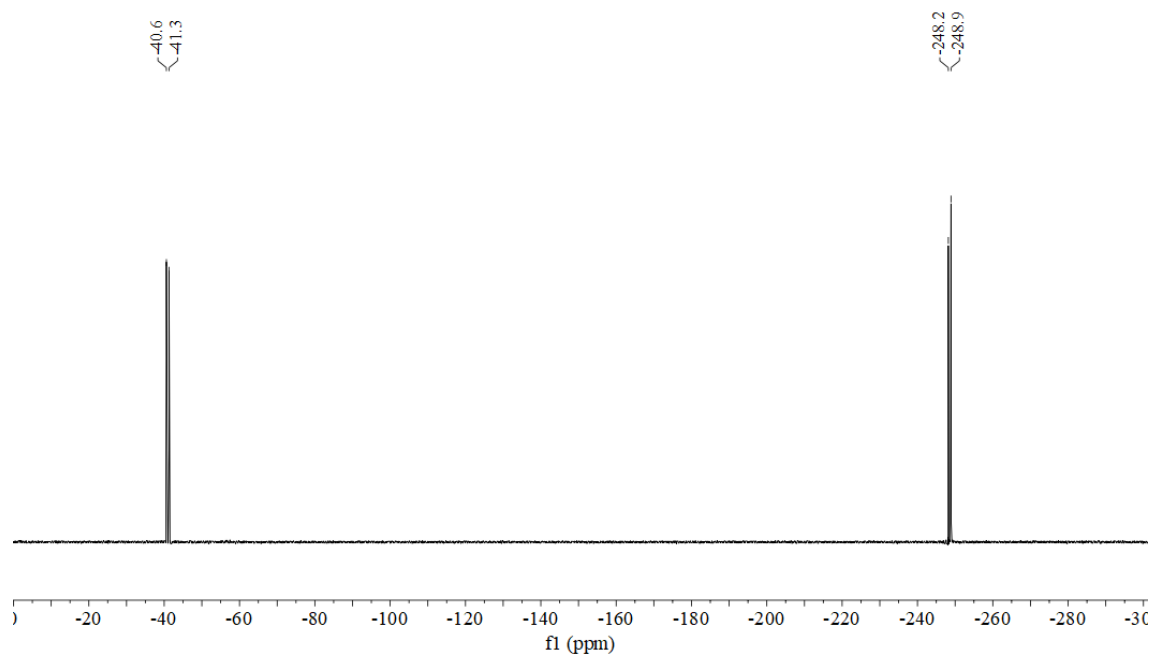

*Figure S37.* <sup>31</sup>P{<sup>1</sup>H} NMR of **5** in C<sub>6</sub>D<sub>6</sub>.

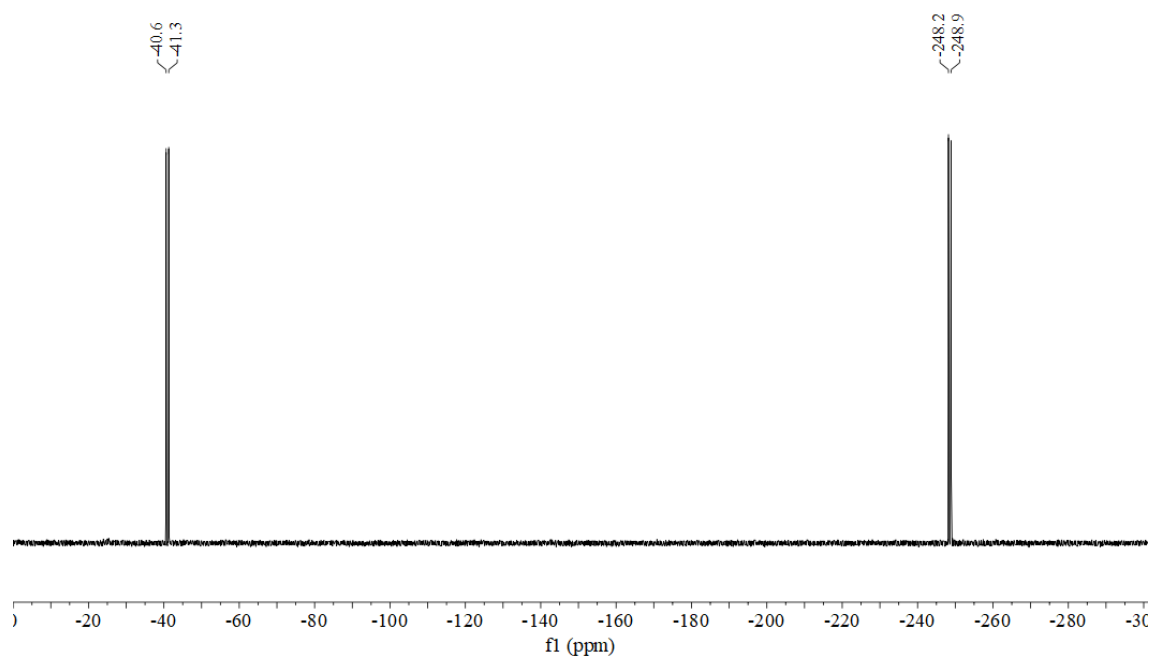

*Figure S38* <sup>31</sup>P NMR of **5** in C<sub>6</sub>D<sub>6</sub>.

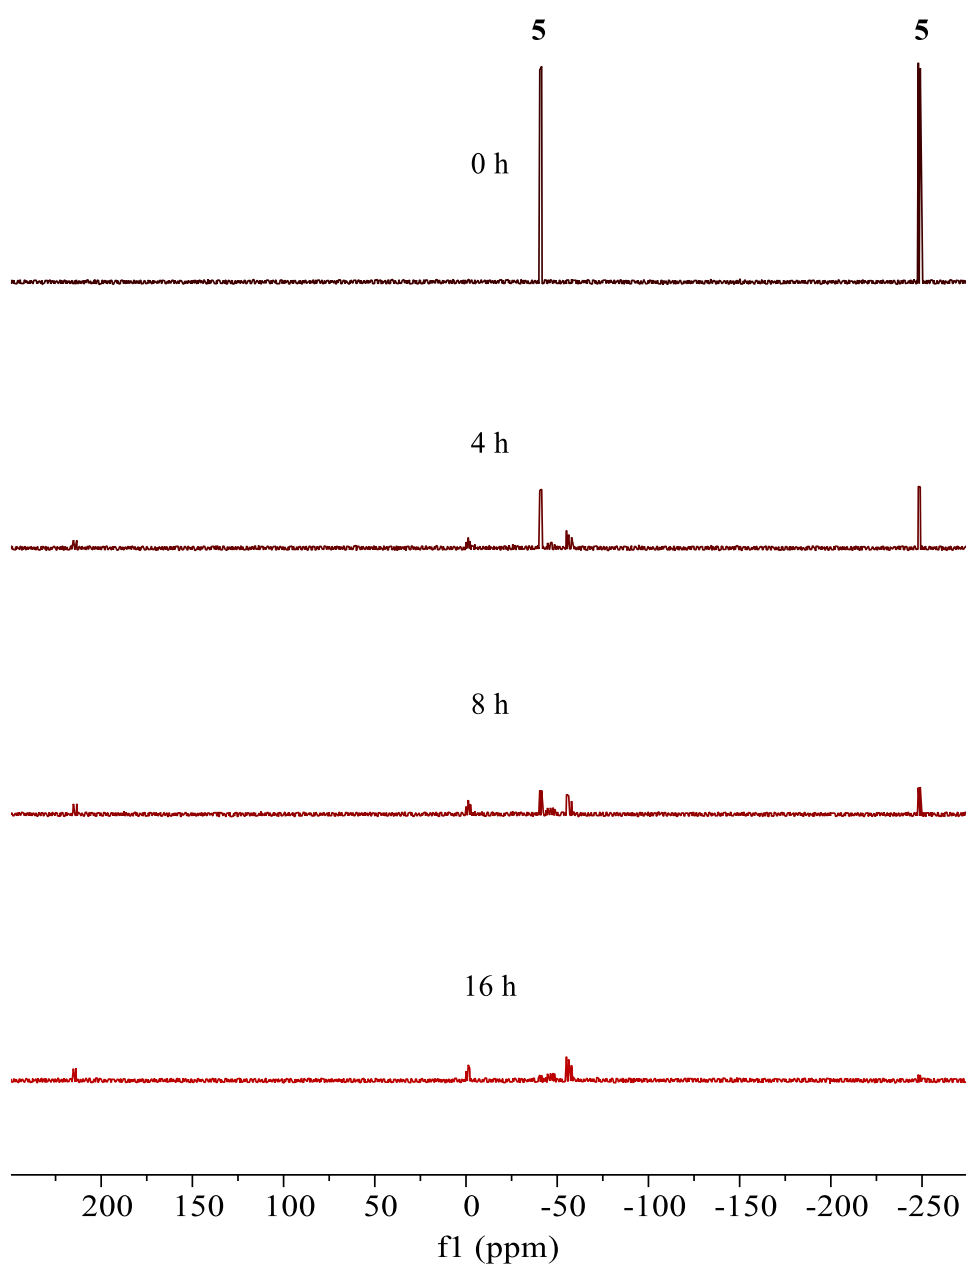

**Figure S39.**  $^{31}\text{P}\{^1\text{H}\}$  NMR spectra of **5** over a period of 16 h in  $\text{C}_6\text{D}_6$  at room temperature.

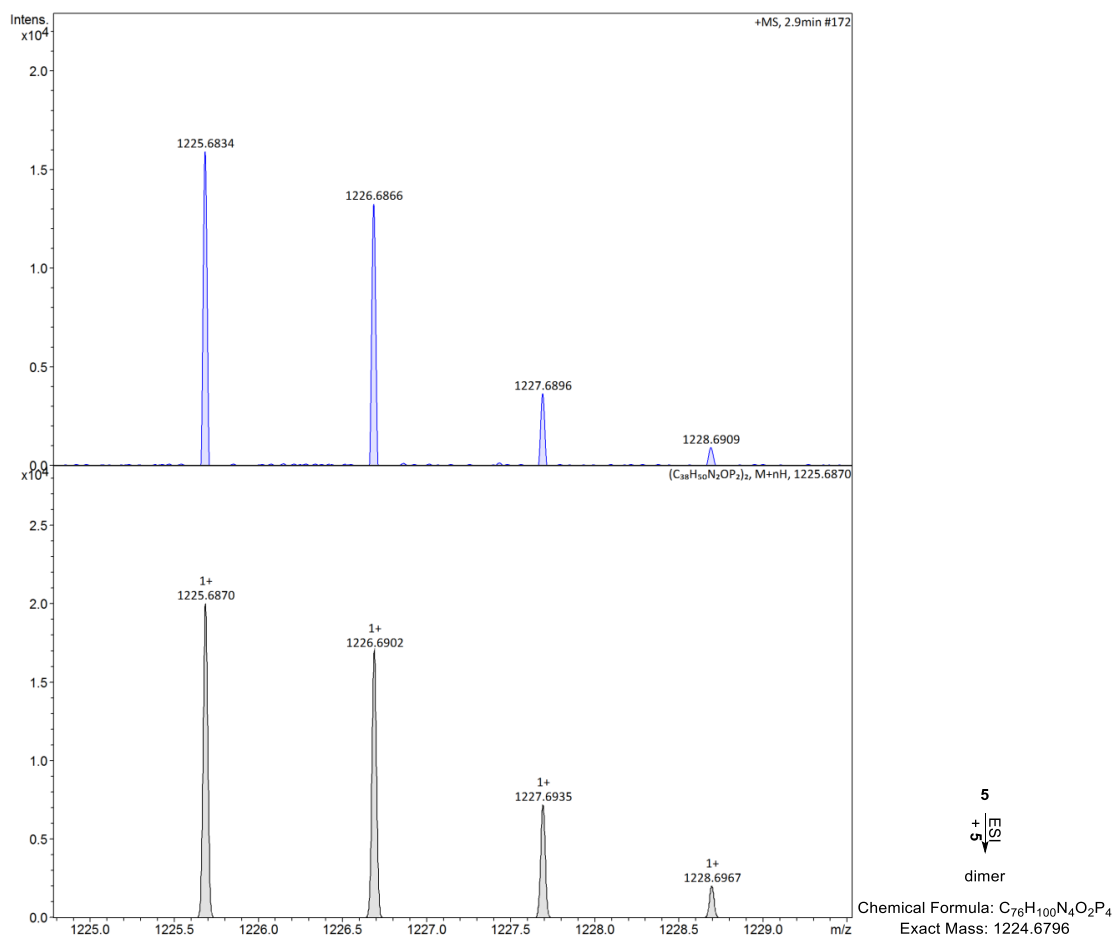

**Figure S40.** HRMS of **5**.

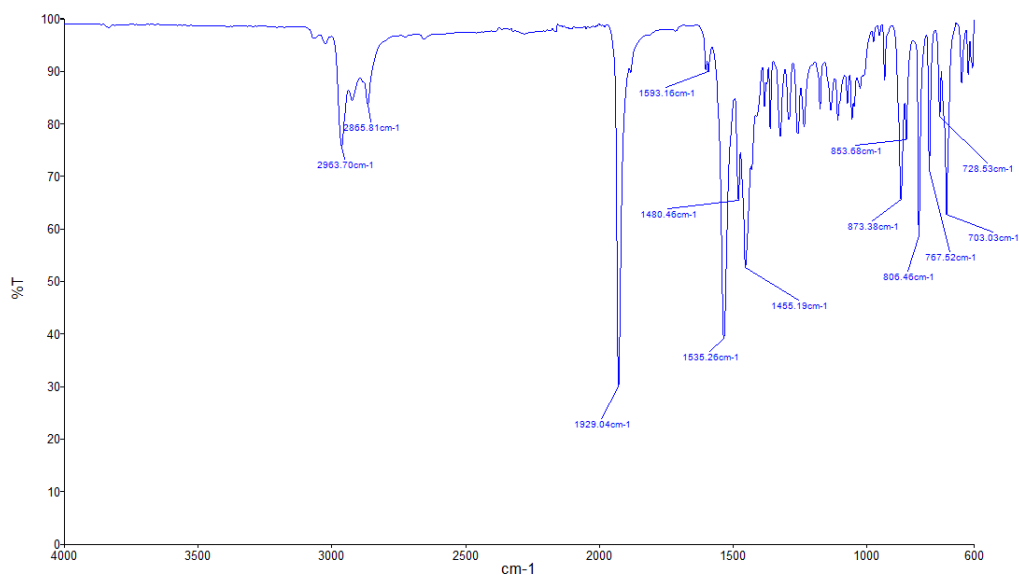

**Figure S41.** IR spectrum of **5**.

### Synthesis of **6a**:

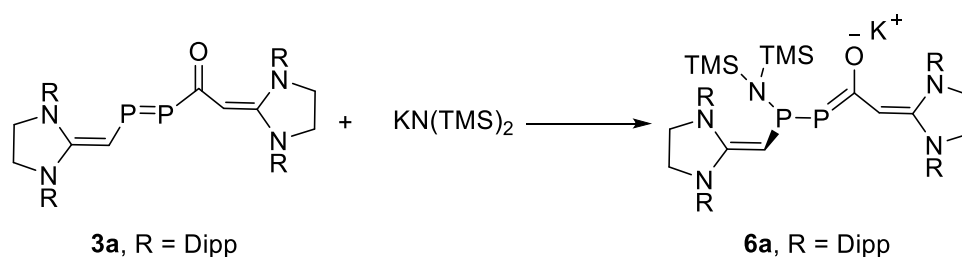

Potassium bis(trimethylsilyl)amide (60 mg, 0.3 mmol) in tetrahydrofuran (4 mL) was added to a stirred solution of **3a** (300 mg, 0.3 mmol) in tetrahydrofuran (12 mL) at room temperature. After stirring for 0.5 hour, the solvent was removed under reduced pressure. Then, the residue was washed with hexane (1 mL) and dried *in vacuo* to afford **6a** (311 mg, yield = 95 %) as a yellow powder. Light orange crystals of **6a** were obtained from a saturated fluorobenzene solution layered hexane on top at -30 °C for 6 days. M. p. = 143.5 °C (Decomposition). <sup>1</sup>H NMR (600.2 MHz, C<sub>6</sub>D<sub>6</sub>): δ = 7.14 (t, *J* = 6.6 Hz, 2 H, C<sub>Ar</sub>H), 7.08 (t, *J* = 8.1 Hz, 2 H, C<sub>Ar</sub>H), 7.03 (t, *J* = 6.8 Hz, 2 H, C<sub>Ar</sub>H), 7.00 (t, *J* = 7.0 Hz, 1 H, C<sub>Ar</sub>H), 6.98~6.90 (m, 4 H, C<sub>Ar</sub>H), 6.86 (d, *J* = 7.5 Hz, 1 H, C<sub>Ar</sub>H), 4.86 (s, 1 H, =CHC(O)), 3.87 (m, 2 H, NCH<sub>2</sub>), 3.72 (m, 2 H, NCH<sub>2</sub>), 3.58 (m, 3 H, NCH<sub>2</sub> & CH(CH<sub>3</sub>)<sub>2</sub>), 3.45 (m, 2 H, NCH<sub>2</sub>), 3.34 (m, 1 H, CH(CH<sub>3</sub>)<sub>2</sub>), 3.27 (m, 3 H, NCH<sub>2</sub> & CH(CH<sub>3</sub>)<sub>2</sub>), 3.18 (m, 1 H, CH(CH<sub>3</sub>)<sub>2</sub>), 3.13 (m, 1 H, CH(CH<sub>3</sub>)<sub>2</sub>), 3.10 (m, 1 H, CH(CH<sub>3</sub>)<sub>2</sub>), 2.88 (t, <sup>2</sup>J<sub>PH</sub> ≈ <sup>3</sup>J<sub>PH</sub> = 8.9 Hz, 1 H, =CHPP), 1.72 (d, *J* = 6.6 Hz, 3 H, CH(CH<sub>3</sub>)<sub>2</sub>), 1.54 (d, *J* = 6.6 Hz, 6 H, CH(CH<sub>3</sub>)<sub>2</sub>), 1.48 (d, *J* = 6.8 Hz, 3 H, CH(CH<sub>3</sub>)<sub>2</sub>), 1.43 (d, *J* = 6.6 Hz, 3 H, CH(CH<sub>3</sub>)<sub>2</sub>), 1.35 (d, *J* = 6.6 Hz, 6 H, CH(CH<sub>3</sub>)<sub>2</sub>), 1.30 (d, *J* = 7.2 Hz, 3 H, CH(CH<sub>3</sub>)<sub>2</sub>), 1.29 (d, *J* = 7.2 Hz, 3 H, CH(CH<sub>3</sub>)<sub>2</sub>), 1.25 (d, *J* = 6.9 Hz, 3 H, CH(CH<sub>3</sub>)<sub>2</sub>), 1.21 (m, 9 H, CH(CH<sub>3</sub>)<sub>2</sub>), 1.14~1.10 (m, 9 H, CH(CH<sub>3</sub>)<sub>2</sub>), 0.42 (br. s, 9 H, -Si(CH<sub>3</sub>)<sub>2</sub>), 0.28 (br. s, 9 H, -Si(CH<sub>3</sub>)<sub>2</sub>). <sup>13</sup>C{<sup>1</sup>H} NMR (150.8 MHz, C<sub>6</sub>D<sub>6</sub>): δ = 217.6 (dd, <sup>1</sup>J<sub>PC</sub> = 81.9 Hz, <sup>2</sup>J<sub>PC</sub> = 7.5 Hz, CO), 152.2 (C<sub>Ar</sub>), 150.8 (d, <sup>2</sup>J<sub>PC</sub> = 25.0 Hz, NCNCHC(O)P), 150.4 (C<sub>Ar</sub>), 150.3 (C<sub>Ar</sub>), 150.0 (C<sub>Ar</sub>), 149.8 (dd, <sup>3</sup>J<sub>PC</sub> = 30.2 Hz, <sup>2</sup>J<sub>PC</sub> = 7.4 Hz, NCNCHPP), 148.7 (C<sub>Ar</sub>), 148.7 (C<sub>Ar</sub>), 148.3 (C<sub>Ar</sub>), 146.7 (C<sub>Ar</sub>), 144.6 (C<sub>Ar</sub>), 144.4 (C<sub>Ar</sub>), 136.7 (C<sub>Ar</sub>), 136.0 (C<sub>Ar</sub>), 128.9 (C<sub>Ar</sub>), 128.7 (C<sub>Ar</sub>), 128.4 (C<sub>Ar</sub>), 125.5 (C<sub>Ar</sub>), 125.3 (C<sub>Ar</sub>), 124.7 (C<sub>Ar</sub>), 124.6 (C<sub>Ar</sub>), 124.5 (C<sub>Ar</sub>), 124.0 (C<sub>Ar</sub>), 123.6 (C<sub>Ar</sub>), 123.0 (C<sub>Ar</sub>), 122.9 (C<sub>Ar</sub>), 87.4 (dd, <sup>1</sup>J<sub>PC</sub> = 74.8 Hz, <sup>2</sup>J<sub>PC</sub> = 4.5 Hz, CHPP), 74.6 (d, <sup>3</sup>J<sub>PC</sub> = 28.2 Hz, CHC(O)PP), 53.2 (NCH<sub>2</sub>), 53.1 (NCH<sub>2</sub>), 49.6 (NCH<sub>2</sub>), 49.2 (NCH<sub>2</sub>), 29.3, 28.8, 28.7,

28.6, 28.3, 28.2, 26.5, 25.9, 25.9, 25.6, 25.6, 25.5, 25.4, 25.0, 24.8, 24.8, 24.8, 24.7, 24.5, 24.3, 23.8, 23.7, 6.5 (Si(CH<sub>3</sub>)<sub>3</sub>), 4.9 (Si(CH<sub>3</sub>)<sub>3</sub>). <sup>31</sup>P{<sup>1</sup>H} NMR (242.9 MHz, C<sub>6</sub>D<sub>6</sub>): δ = 61.6 (d, <sup>1</sup>J<sub>PP</sub> = 276.8 Hz, (N(TMS)<sub>2</sub>)PP), 29.7 (d, <sup>1</sup>J<sub>PP</sub> = 276.8 Hz, (N(TMS)<sub>2</sub>)PP). UV/Vis (toluene, λ (nm) ε (M<sup>-1</sup>cm<sup>-1</sup>)): 314.5 (35226), 428.5 (41434). HRMS (ESI, m/z) calc. for: C<sub>63</sub>H<sub>96</sub>N<sub>5</sub>OP<sub>2</sub>Si<sub>2</sub><sup>-</sup>: 1056.6634 [M]<sup>-</sup>; found: not detected. IR (ATR, cm<sup>-1</sup>): 2959, 2867, 1568, 1505, 1448, 869, 805.

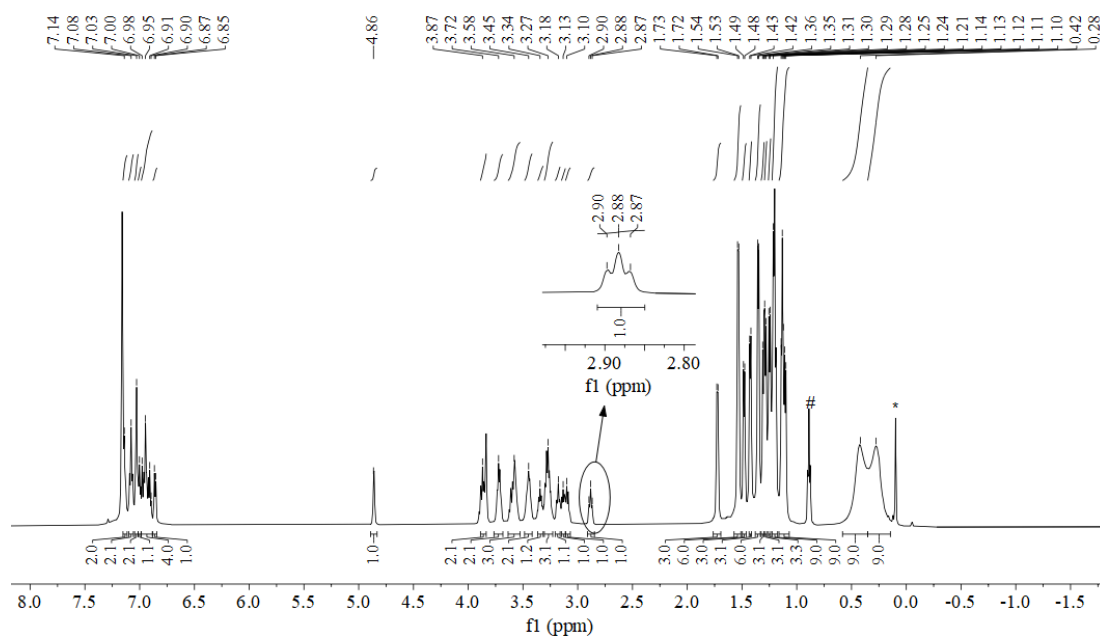

**Figure S42.** <sup>1</sup>H NMR of **6a** in C<sub>6</sub>D<sub>6</sub>. #Hexane, \*silicone grease.

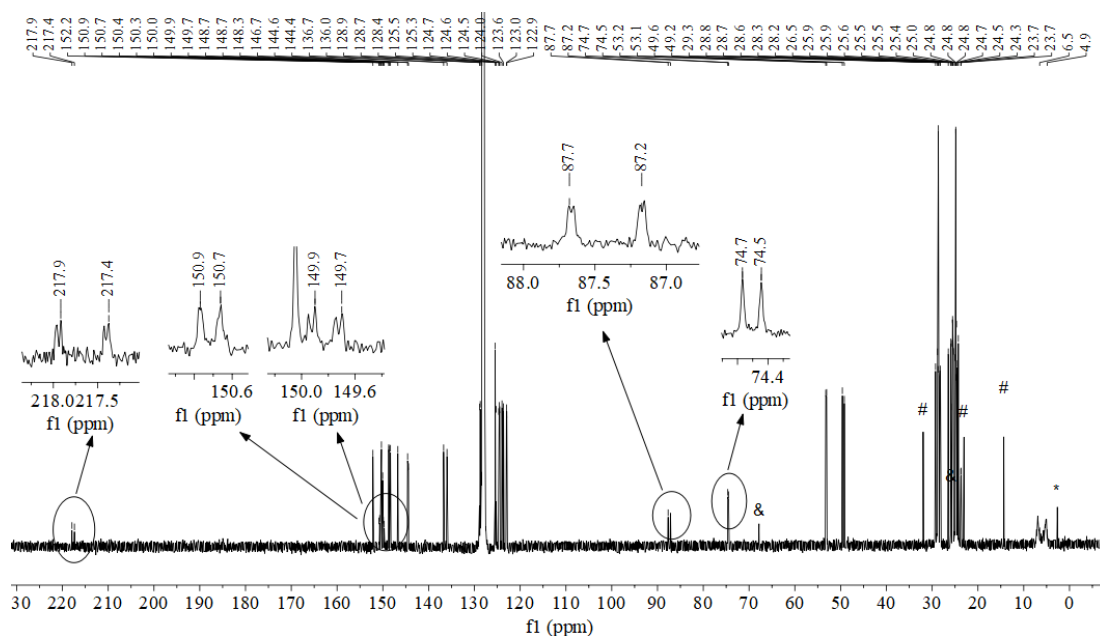

**Figure S43.** <sup>13</sup>C{<sup>1</sup>H} NMR of **6a** in C<sub>6</sub>D<sub>6</sub>. #Hexane, \*silicone grease, &tetrahydrofuran.

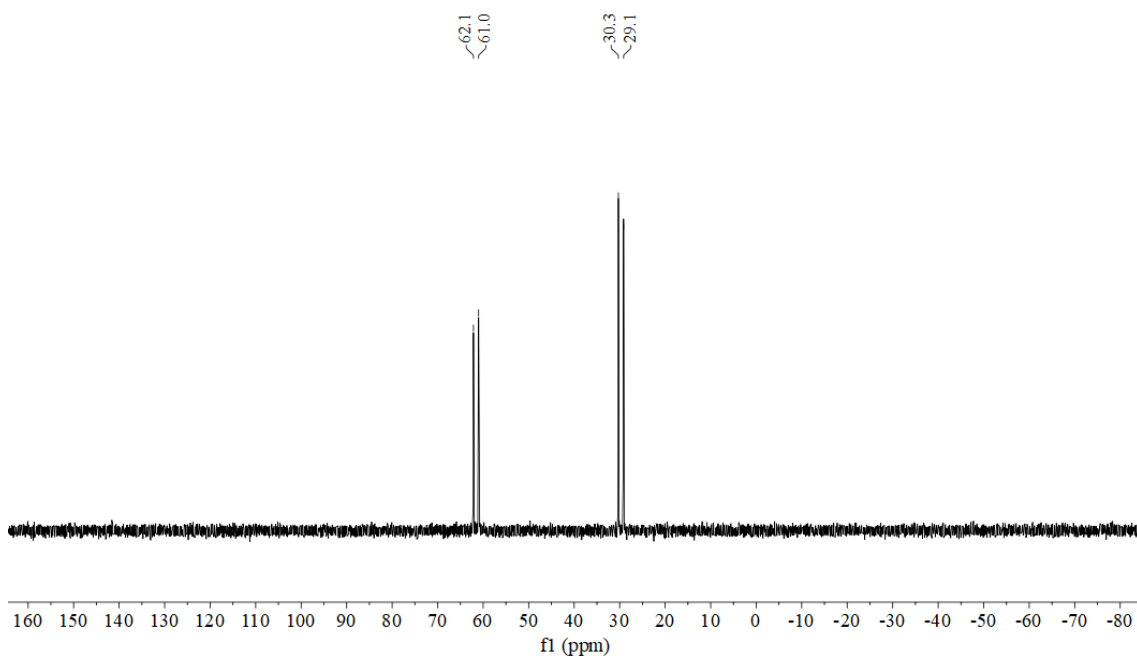

*Figure S44.* <sup>31</sup>P{<sup>1</sup>H} NMR of **6a** in C<sub>6</sub>D<sub>6</sub>.

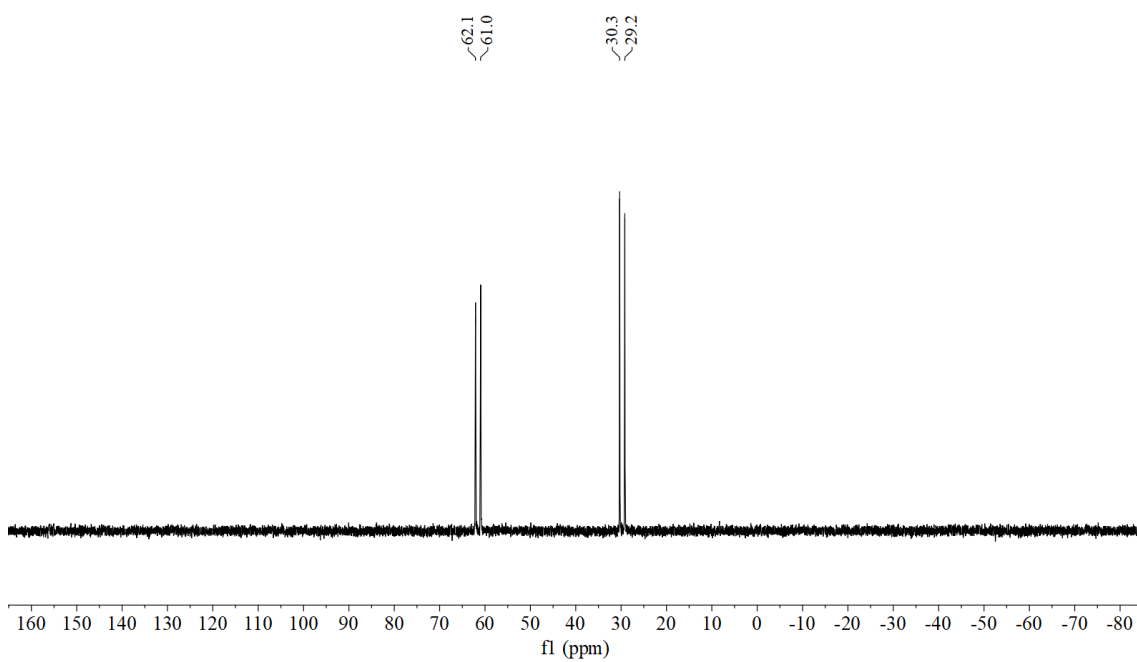

*Figure S45.* <sup>31</sup>P NMR of **6a** in C<sub>6</sub>D<sub>6</sub>.



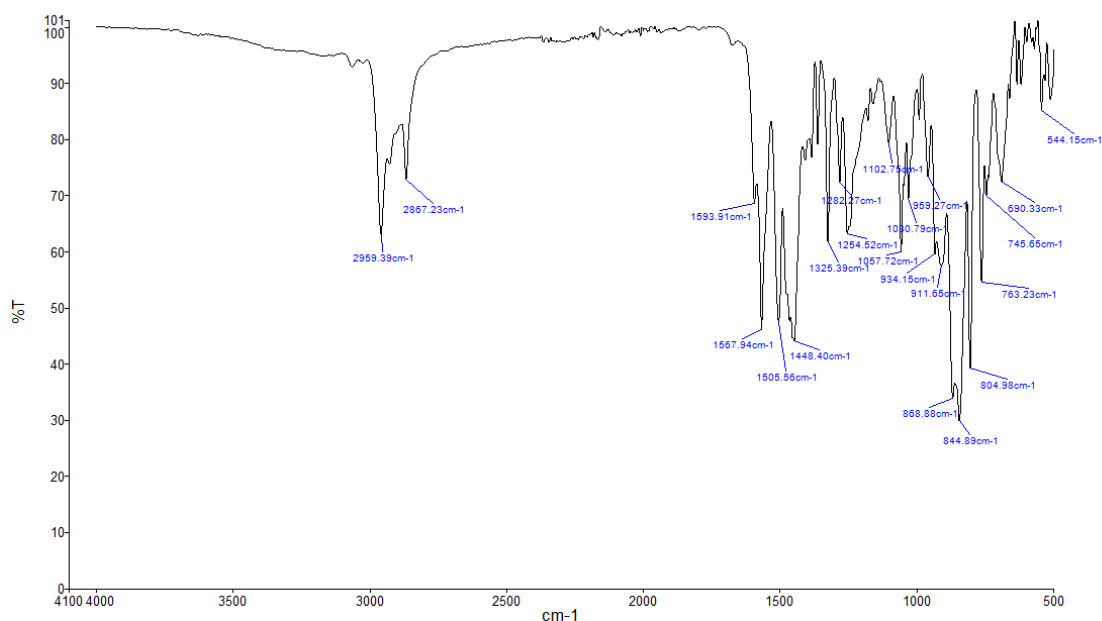

**Figure S46.** IR spectrum of **6a**.

### Synthesis of **7a**:

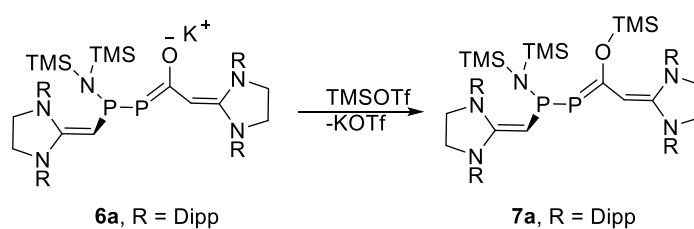

Trimethylsilyl trifluoromethanesulfonate (66 mg, 0.3 mmol) in tetrahydrofuran (4 mL) was added to a stirred solution of **6a** (300 mg, 0.3 mmol) in tetrahydrofuran (20 mL) at room temperature. After stirring for 10 minutes, the solvent was removed under reduced pressure and the residue was extracted with hexane. Then, the solvent was removed under reduced pressure, the residue was washed with acetonitrile (1 mL) and dried *in vacuo* to afford **7a** (121 mg, yield = 36 %) as a yellow powder. M. p. = 183.7 °C (Decomposition). <sup>1</sup>H NMR (600.2 MHz, C<sub>6</sub>D<sub>6</sub>): δ = 7.33 (t, *J* = 7.7 Hz, 1 H, C<sub>Ar</sub>H), 7.28 (d, *J* = 7.7 Hz, 1 H, C<sub>Ar</sub>H), 7.24~7.21 (m, 3 H, C<sub>Ar</sub>H), 7.18 (d, *J* = 7.5 Hz, 2 H, C<sub>Ar</sub>H), 7.14 (d, *J* = 6.8 Hz, 1 H, C<sub>Ar</sub>H), 7.12 (t, *J* = 8.0 Hz, 2 H, C<sub>Ar</sub>H), 7.04 (d, *J* = 7.7 Hz, 1 H, C<sub>Ar</sub>H), 7.02 (d, *J* = 7.7 Hz, 1 H, C<sub>Ar</sub>H), 4.02 (d, <sup>2</sup>*J*<sub>PH</sub> = 18.2 Hz, =CHPP), 3.82 (d, <sup>3</sup>*J*<sub>PH</sub> = 9.4 Hz, =CHC(OSi(CH<sub>3</sub>)<sub>3</sub>)P), 3.64 (m, 1 H, CH(CH<sub>3</sub>)<sub>3</sub>), 3.57 (m, 1 H, CH(CH<sub>3</sub>)<sub>3</sub>), 3.52 (m, 1 H, CH(CH<sub>3</sub>)<sub>3</sub>), 3.49 (m, 2 H, CH(CH<sub>3</sub>)<sub>3</sub>), 3.42 (m, 4 H, NCH<sub>2</sub>), 3.35~3.23 (m, 1 H, CH(CH<sub>3</sub>)<sub>3</sub> & 4 H, NCH<sub>2</sub>), 3.17 (m, 1 H, CH(CH<sub>3</sub>)<sub>3</sub>), 3.05 (m, 1 H,

$\text{CH}(\text{CH}_3)_3$ , 1.64 (d,  $J = 6.9$  Hz, 3 H,  $\text{CH}(\text{CH}_3)_3$ ), 1.52 (d,  $J = 6.9$  Hz, 3 H,  $\text{CH}(\text{CH}_3)_3$ ), 1.49 (d,  $J = 6.7$  Hz, 3 H,  $\text{CH}(\text{CH}_3)_3$ ), 1.46 (m, 6 H,  $\text{CH}(\text{CH}_3)_3$ ), 1.37 (m, 6 H,  $\text{CH}(\text{CH}_3)_3$ ), 1.31 (m, 12 H,  $\text{CH}(\text{CH}_3)_3$ ), 1.26 (d,  $J = 3.5$  Hz, 3 H,  $\text{CH}(\text{CH}_3)_3$ ), 1.24 (d,  $J = 3.8$  Hz, 3 H,  $\text{CH}(\text{CH}_3)_3$ ), 1.18 (m, 6 H,  $\text{CH}(\text{CH}_3)_3$ ), 1.16 (d,  $J = 6.9$  Hz, 3 H,  $\text{CH}(\text{CH}_3)_3$ ), 0.24 (s, 9 H,  $\text{NSi}(\text{CH}_3)_3$ ), 0.10 (s, 9 H,  $\text{NSi}(\text{CH}_3)_3$ ), 0.01 (s, 9 H,  $\text{OSi}(\text{CH}_3)_3$ ).  $^{13}\text{C}\{^1\text{H}\}$  NMR (150.8 MHz,  $\text{C}_6\text{D}_6$ ):  $\delta = 193.8$  (dd,  $^1J_{\text{PC}} = 85.4$  Hz,  $^2J_{\text{PC}} = 13.3$  Hz, CO), 154.3 (d,  $^3J_{\text{PC}} = 4.0$  Hz,  $\text{NCN}=\text{CH}-\text{CO}-$ ), 153.5 (dd,  $^2J_{\text{PC}} = 35.6$  Hz,  $^3J_{\text{PC}} = 12.7$  Hz,  $\text{NCN}-\text{PP}$ ), 149.3 ( $C_{\text{Ar}}$ ), 148.9 ( $C_{\text{Ar}}$ ), 148.8 ( $C_{\text{Ar}}$ ), 148.8 ( $C_{\text{Ar}}$ ), 148.7 ( $C_{\text{Ar}}$ ), 148.6 ( $C_{\text{Ar}}$ ), 147.1 ( $C_{\text{Ar}}$ ), 146.0 ( $C_{\text{Ar}}$ ), 146.0 ( $C_{\text{Ar}}$ ), 145.4 ( $C_{\text{Ar}}$ ), 138.7 ( $C_{\text{Ar}}$ ), 138.4 ( $C_{\text{Ar}}$ ), 138.4 ( $C_{\text{Ar}}$ ), 137.5 ( $C_{\text{Ar}}$ ), 136.8 ( $C_{\text{Ar}}$ ), 129.0 ( $C_{\text{Ar}}$ ), 128.4 ( $C_{\text{Ar}}$ ), 125.8 ( $C_{\text{Ar}}$ ), 125.5 ( $C_{\text{Ar}}$ ), 124.8 ( $C_{\text{Ar}}$ ), 124.6 ( $C_{\text{Ar}}$ ), 124.3 ( $C_{\text{Ar}}$ ), 124.1 ( $C_{\text{Ar}}$ ), 123.9 ( $C_{\text{Ar}}$ ), 86.2 (d,  $^2J_{\text{PC}} = 21.0$  Hz,  $=\text{CHC}(\text{OTMS})\text{P}$ ), 71.1 (dd,  $^1J_{\text{PC}} = 37.4$  Hz,  $^2J_{\text{PC}} = 24.1$  Hz,  $=\text{CHPP}$ ), 54.9 ( $\text{NCH}_2$ ), 52.8 ( $\text{NCH}_2$ ), 50.2 ( $\text{NCH}_2$ ), 49.5 ( $\text{NCH}_2$ ), 29.0, 28.9, 28.8, 28.7, 28.7, 28.6, 28.1, 27.0, 26.5, 26.2, 26.1, 26.0, 25.9, 25.4, 25.2, 24.8, 24.8, 24.4, 24.4, 24.3, 24.0, 23.9, 23.6, 23.5, 7.5 (br.,  $\text{PNSiCH}_3$ ), 5.2 (d,  $^3J_{\text{PC}} = 13.6$  Hz,  $\text{PNSi}(\text{CH}_3)_3$ ), 2.45 ( $\text{COSi}(\text{CH}_3)$ ).  $^{31}\text{P}\{^1\text{H}\}$  NMR (242.9 MHz,  $\text{C}_6\text{D}_6$ ):  $\delta = 140.8$  (d,  $^1J_{\text{PP}} = 245.5$  Hz,  $\text{CH}-\text{P}[\text{N}(\text{TMS})_2]-\text{P}-$ ), 29.9 (d,  $^1J_{\text{PP}} = 245.5$  Hz,  $\text{CH}-\text{P}[\text{N}(\text{TMS})_2]-\text{P}-$ ).  $^{31}\text{P}$  NMR (242.9 MHz,  $\text{C}_6\text{D}_6$ ):  $\delta = 140.8$  (dq,  $^1J_{\text{PP}} = 245.5$  Hz,  $\text{CH}-\text{P}[\text{N}(\text{TMS})_2]-\text{P}-$ ), 29.9 (d,  $^1J_{\text{PP}} = 245.5$  Hz,  $\text{CH}-\text{P}[\text{N}(\text{TMS})_2]-\text{P}-$ ). UV/Vis (toluene,  $\lambda$  (nm)  $\epsilon$  ( $\text{M}^{-1}\text{cm}^{-1}$ )): 325.5 (37785), 425.0 (5080). HRMS (ESI,  $m/z$ ) calc. for:  $\text{C}_{66}\text{H}_{105}\text{N}_5\text{OP}_2\text{Si}_3$ : 1129.7102 [ $\text{M}$ ] $^+$ ; found: not detected. IR (ATR,  $\text{cm}^{-1}$ ): 2959, 2866, 1548, 877, 863, 843, 801.

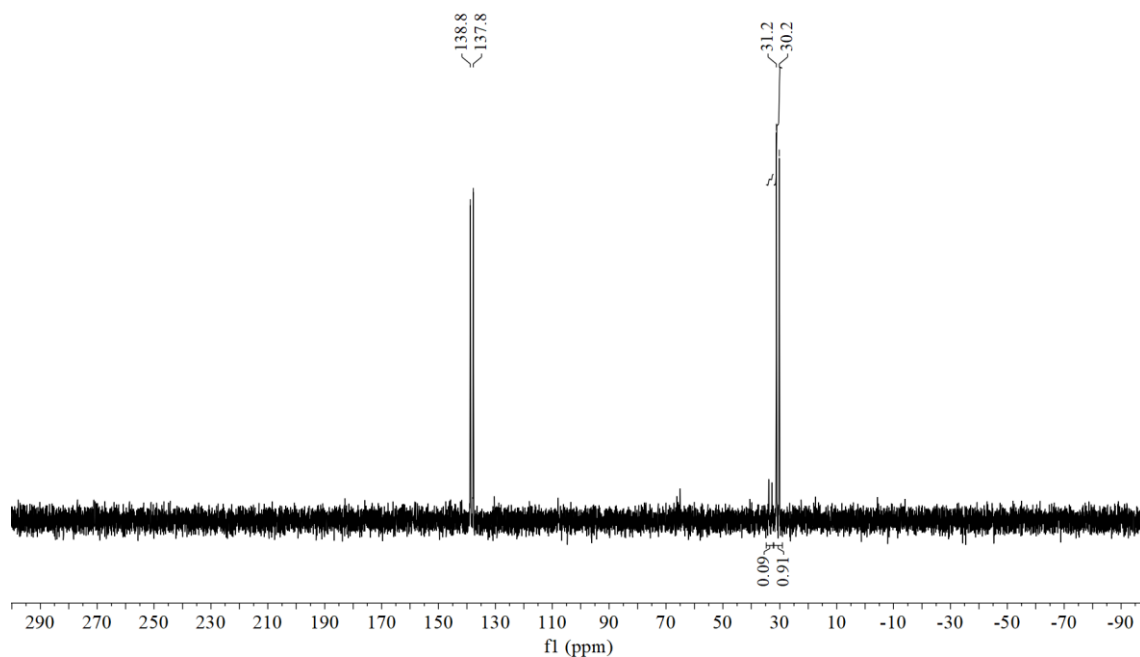

**Figure S47.** <sup>31</sup>P{<sup>1</sup>H} NMR of the reaction mixture for the preparation of **7a** in tetrahydrofuran, the NMR spectroscopic yield is about 91%.

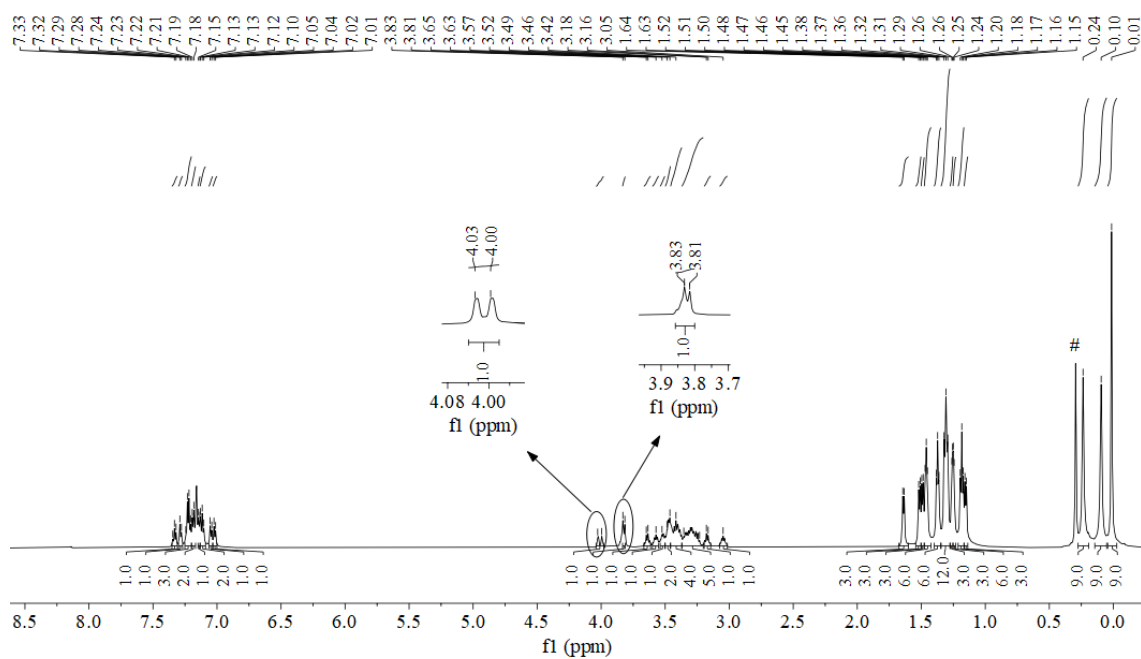

**Figure S48.** <sup>1</sup>H NMR of **7a** in C<sub>6</sub>D<sub>6</sub>.

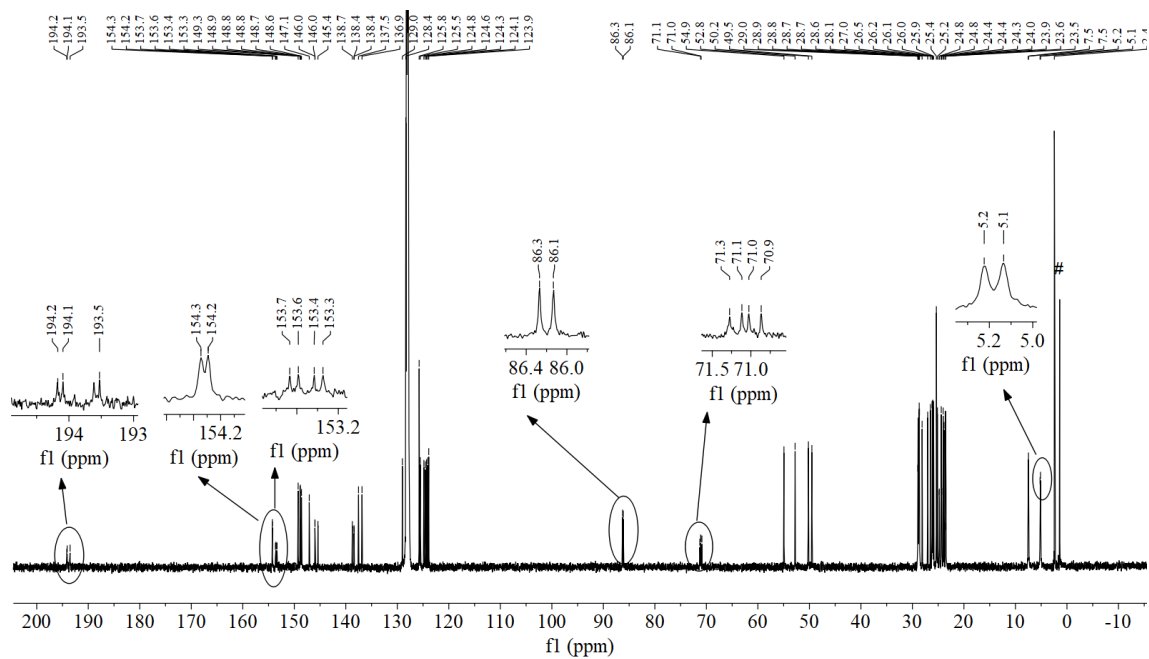

*Figure S49.*  $^{13}\text{C}\{^1\text{H}\}$  NMR of **7a** in  $\text{C}_6\text{D}_6$ .

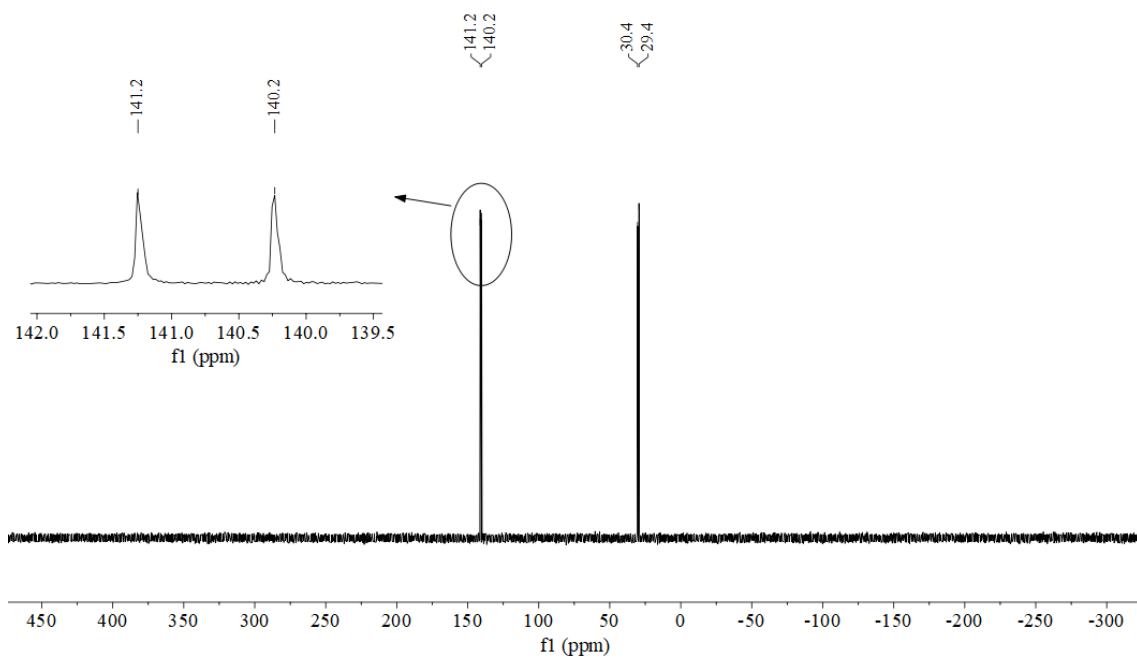

*Figure S50.*  $^{31}\text{P}\{^1\text{H}\}$  NMR of **7a** in  $\text{C}_6\text{D}_6$ .

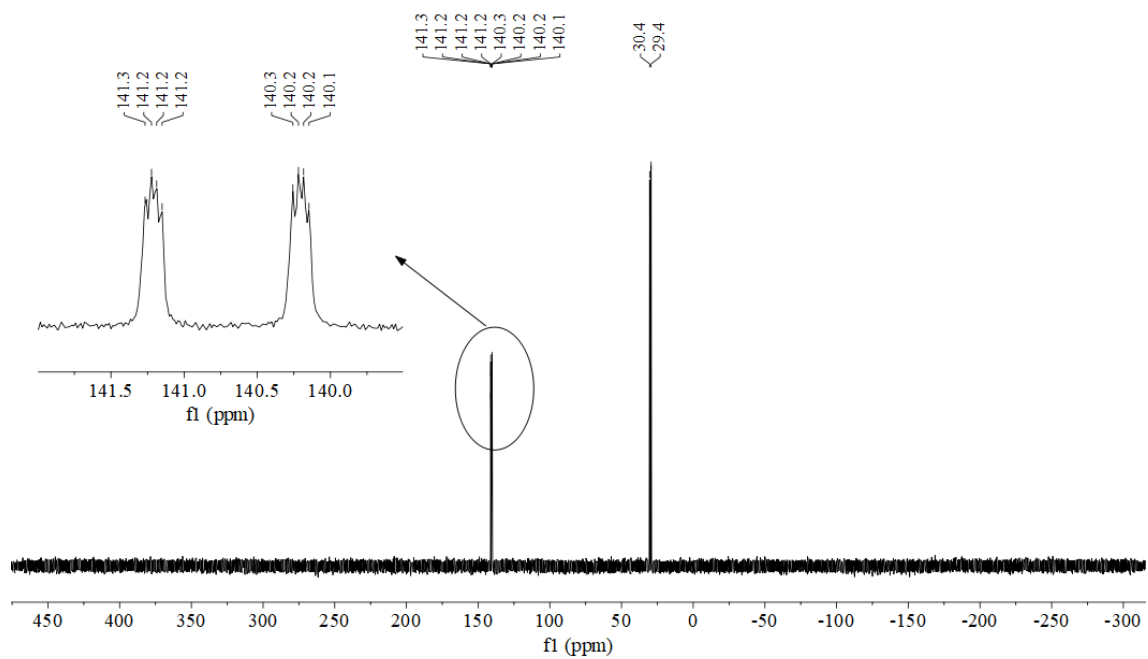

**Figure S51.**  $^{31}\text{P}$  NMR of **7a** in  $\text{C}_6\text{D}_6$ .

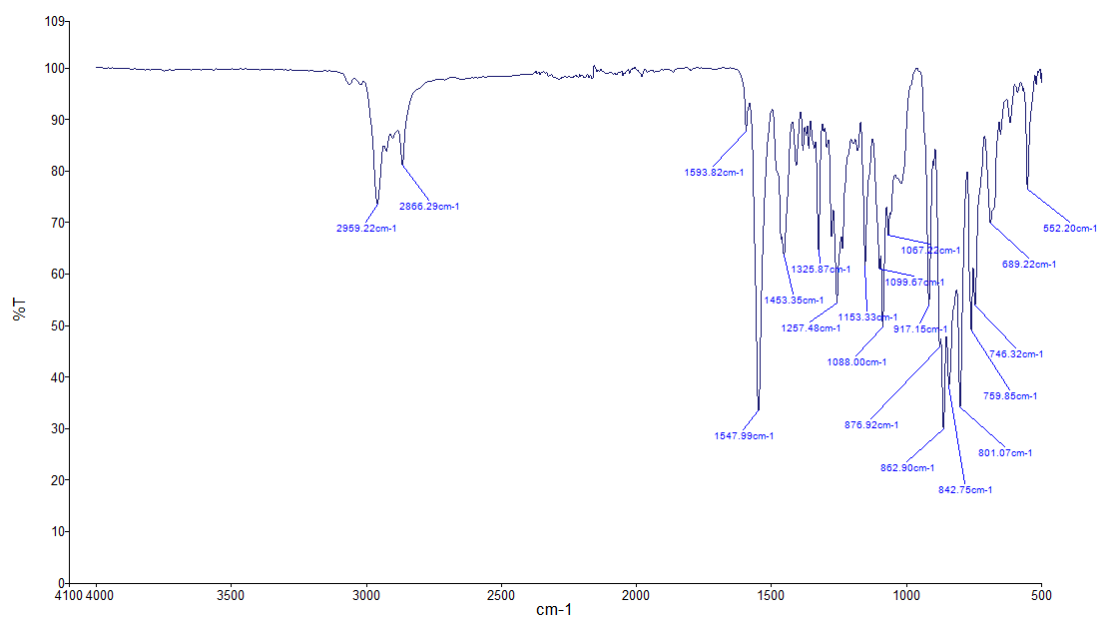

**Figure S52.** IR spectrum of **7a**.

### Synthesis of **8a**:

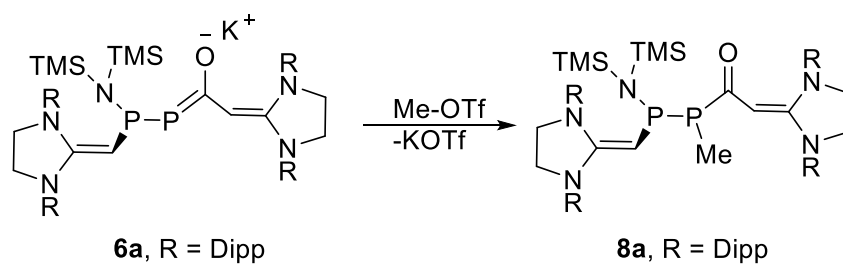

Methyl trifluoromethanesulfonate (49 mg, 0.3 mmol) in tetrahydrofuran (4 mL) was added to a stirred solution of **6a** (300 mg, 0.3 mmol) in tetrahydrofuran (20 mL) at room temperature. After stirring for 0.5 hour, the solvent was removed under reduced pressure and the residue was extracted with hexane (20 mL). Then, the residue was washed with acetonitrile (1 mL) and dried *in vacuo* to afford **8a** (167 mg, yield = 49 %) as a light yellow powder. Light yellow crystals of **8a** were obtained from a saturated acetonitrile solution stored at -30 °C for 5 days. M. p. = 162.1 °C (Decomposition). <sup>1</sup>H NMR (400.1 MHz, C<sub>6</sub>D<sub>6</sub>): δ = 7.26~7.17 (m, 6 H, C<sub>Ar</sub>H), 7.13~7.08 (m, 5 H, C<sub>Ar</sub>H), 7.00 (d, *J* = 7.2 Hz, 1 H, C<sub>Ar</sub>H), 4.41 (s, 1 H, PC(O)CH=), 3.65 (d, <sup>2</sup>*J*<sub>PH</sub> = 8.8 Hz, 1 H, PPCH=), 3.56 (m, 3 H, CH(CH<sub>3</sub>)<sub>2</sub>), 3.41 (m, 4 H, NCH<sub>2</sub>), 3.36 (m, 1 H, CH(CH<sub>3</sub>)<sub>2</sub>), 3.26 (m, 4 H, NCH<sub>2</sub>), 3.15 (m, 3 H, CH(CH<sub>3</sub>)<sub>2</sub>), 3.01 (m, 1 H, CH(CH<sub>3</sub>)<sub>2</sub>), 1.54 (d, *J*<sub>HH</sub> = 6.7 Hz, 3 H, CH(CH<sub>3</sub>)<sub>2</sub>), 1.51~1.47 (m, 6 H, CH(CH<sub>3</sub>)<sub>2</sub>), 1.44~1.39 (m, 12 H, CH(CH<sub>3</sub>)<sub>2</sub>), 1.31~1.28 (m, 6 H, CH(CH<sub>3</sub>)<sub>2</sub>), 1.24~1.16 (m, 21 H, CH(CH<sub>3</sub>)<sub>2</sub>), 1.01 (d, *J* = 6.7 Hz, 3 H, P(CH<sub>3</sub>)), 0.17 (s, 9 H, Si(CH<sub>3</sub>)<sub>3</sub>), 0.05 (s, 9 H, Si(CH<sub>3</sub>)<sub>3</sub>). <sup>13</sup>C{<sup>1</sup>H} NMR (150.8 MHz, C<sub>6</sub>D<sub>6</sub>): δ = 201.7 (dd, <sup>1</sup>*J*<sub>PC</sub> = 32.9 Hz, <sup>2</sup>*J*<sub>PC</sub> = 10.4 Hz, CO), 157.9 (dd, <sup>2</sup>*J*<sub>PC</sub> = 38.6 Hz, <sup>3</sup>*J*<sub>PC</sub> = 9.1 Hz, (NCN)=CHPP-), 155.9 (d, <sup>3</sup>*J*<sub>PC</sub> = 9.5 Hz, (NCN)=CHC(O)PP-), 149.2 (C<sub>Ar</sub>), 148.8 (C<sub>Ar</sub>), 148.8 (C<sub>Ar</sub>), 148.6 (C<sub>Ar</sub>), 148.5 (C<sub>Ar</sub>), 146.3 (C<sub>Ar</sub>), 145.8 (C<sub>Ar</sub>), 145.7 (C<sub>Ar</sub>), 140.6 (C<sub>Ar</sub>), 140.6 (C<sub>Ar</sub>), 138.4 (C<sub>Ar</sub>), 135.7 (C<sub>Ar</sub>), 135.2 (C<sub>Ar</sub>), 129.4 (C<sub>Ar</sub>), 128.8 (C<sub>Ar</sub>), 128.4 (C<sub>Ar</sub>), 128.0 (C<sub>Ar</sub>), 125.6 (C<sub>Ar</sub>), 124.9 (C<sub>Ar</sub>), 124.8 (C<sub>Ar</sub>), 124.7 (C<sub>Ar</sub>), 124.5 (C<sub>Ar</sub>), 124.2 (C<sub>Ar</sub>), 124.0 (C<sub>Ar</sub>), 81.7 (d, <sup>1</sup>*J*<sub>PC</sub> = 45.9 Hz, =CH-PP-), 69.4 (dd, <sup>2</sup>*J*<sub>PC</sub> = 29.2 Hz, <sup>3</sup>*J*<sub>PC</sub> = 24.5 Hz, =CHC(O)P), 53.1 (NCH<sub>2</sub>), 53.0 (NCH<sub>2</sub>), 49.9 (NCH<sub>2</sub>), 49.5 (NCH<sub>2</sub>), 29.3, 29.2, 29.0, 28.9, 28.9, 28.6, 28.5, 28.4, 26.5, 25.9, 25.9, 25.6, 25.4, 25.3, 25.1, 24.9, 24.7, 24.5, 24.2, 24.1, 24.1, 24.1, 24.0, 23.6, 8.7 (t, <sup>1</sup>*J*<sub>PC</sub> ≈ <sup>2</sup>*J*<sub>PC</sub> = 24.2 Hz, -PP(CH<sub>3</sub>-), 6.7 (d, <sup>3</sup>*J*<sub>PC</sub> = 6.7 Hz, -PNSi(CH<sub>3</sub>)<sub>2</sub>), 5.2 (d, <sup>3</sup>*J*<sub>PC</sub> = 15.0 Hz, -PNSi(CH<sub>3</sub>)<sub>2</sub>). <sup>31</sup>P{<sup>1</sup>H} NMR (242.9 MHz, C<sub>6</sub>D<sub>6</sub>): δ = 40.3 (d, <sup>1</sup>*J*<sub>PP</sub> = 170.5 Hz, -C(O)-P(CH<sub>3</sub>)-P-), -20.4 (d, <sup>1</sup>*J*<sub>PP</sub> = 170.5 Hz, -C(O)-P(CH<sub>3</sub>)-P-). <sup>31</sup>P NMR (242.9 MHz, C<sub>6</sub>D<sub>6</sub>): δ = 40.3 (d, <sup>1</sup>*J*<sub>PP</sub> = 170.5 Hz, -C(O)-P(CH<sub>3</sub>)-P-), -20.4 (d, <sup>1</sup>*J*<sub>PP</sub> = 170.5 Hz, -C(O)-P(CH<sub>3</sub>)-P-). UV/Vis (toluene, λ (nm)) ε (M<sup>-1</sup>cm<sup>-1</sup>): 304.5 (32237), 335.0 (34665), 379.5 (12458). HRMS (ESI, m/z) calc. for: C<sub>64</sub>H<sub>99</sub>N<sub>5</sub>OP<sub>2</sub>Si<sub>2</sub>: 1110.6495 [M+K]<sup>+</sup>; found: 1110.6481. IR (ATR, cm<sup>-1</sup>): 2960, 2927, 2868, 1515, 1053, 882, 850, 840, 800, 760.

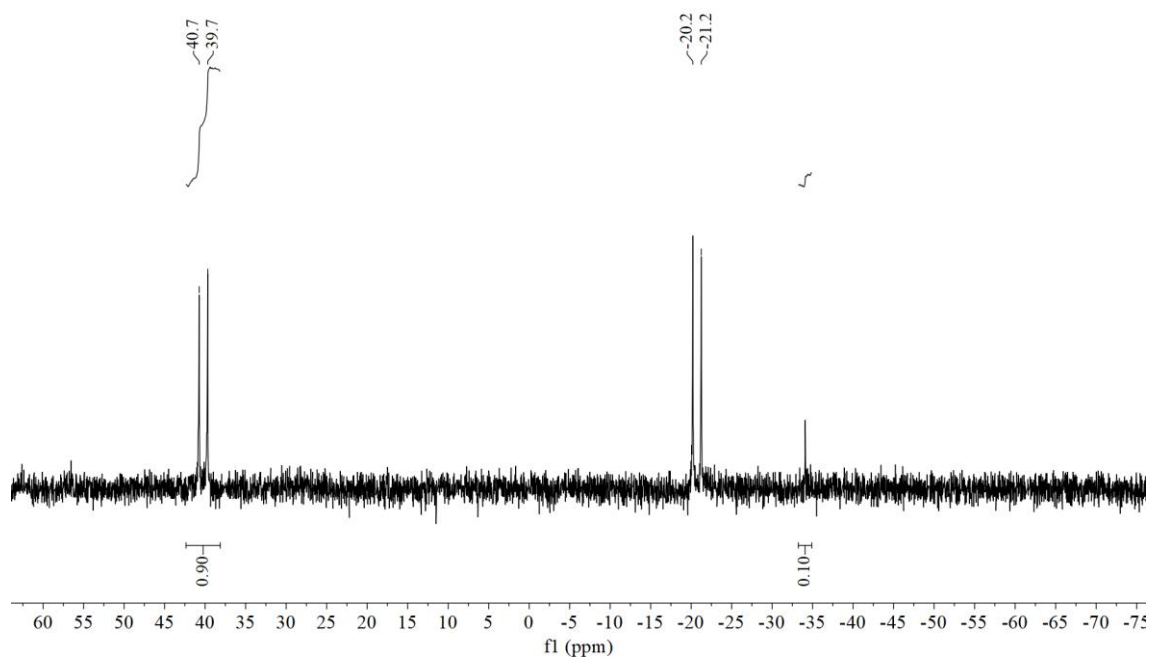

**Figure S53.**  $^{31}\text{P}\{^1\text{H}\}$  NMR of the reaction mixture for the preparation of **8a** in tetrahydrofuran, the NMR spectroscopic yield is about 90%.

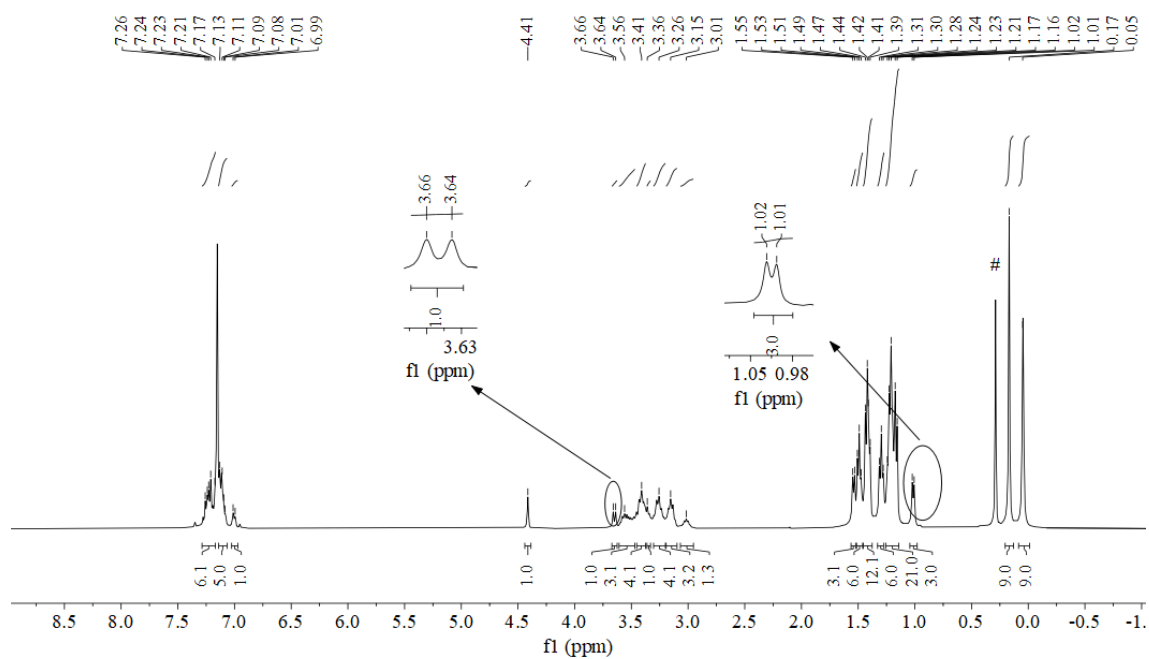

**Figure S54.**  $^1\text{H}$  NMR of **8a** in  $\text{C}_6\text{D}_6$ . # silicon grease.

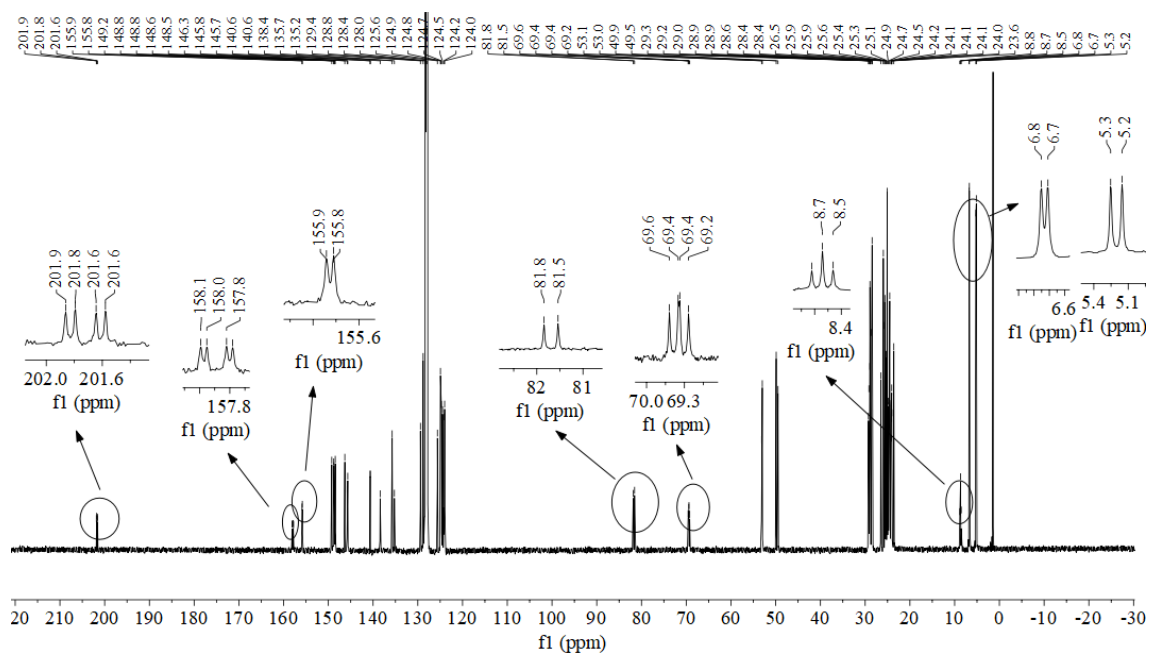

**Figure S55.**  $^{13}\text{C}\{^1\text{H}\}$  NMR of **8a** in  $\text{C}_6\text{D}_6$ .

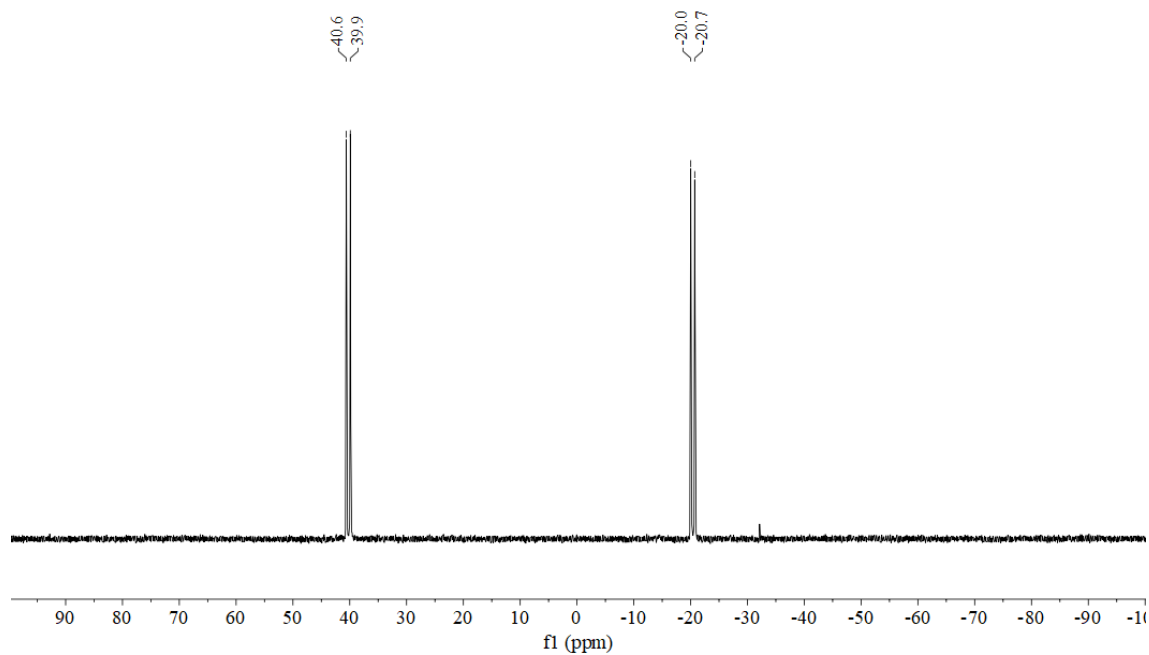

**Figure S56.**  $^{31}\text{P}\{^1\text{H}\}$  NMR of **8a** in  $\text{C}_6\text{D}_6$ .



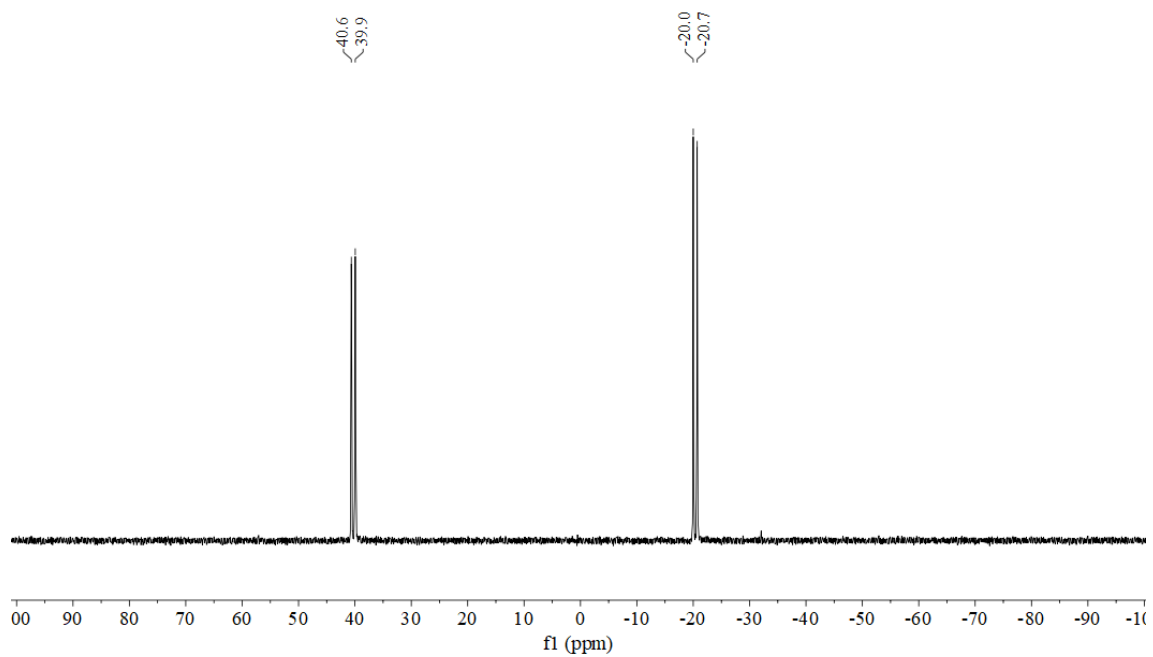

**Figure S57.** <sup>31</sup>P NMR of **8a** in C<sub>6</sub>D<sub>6</sub>.

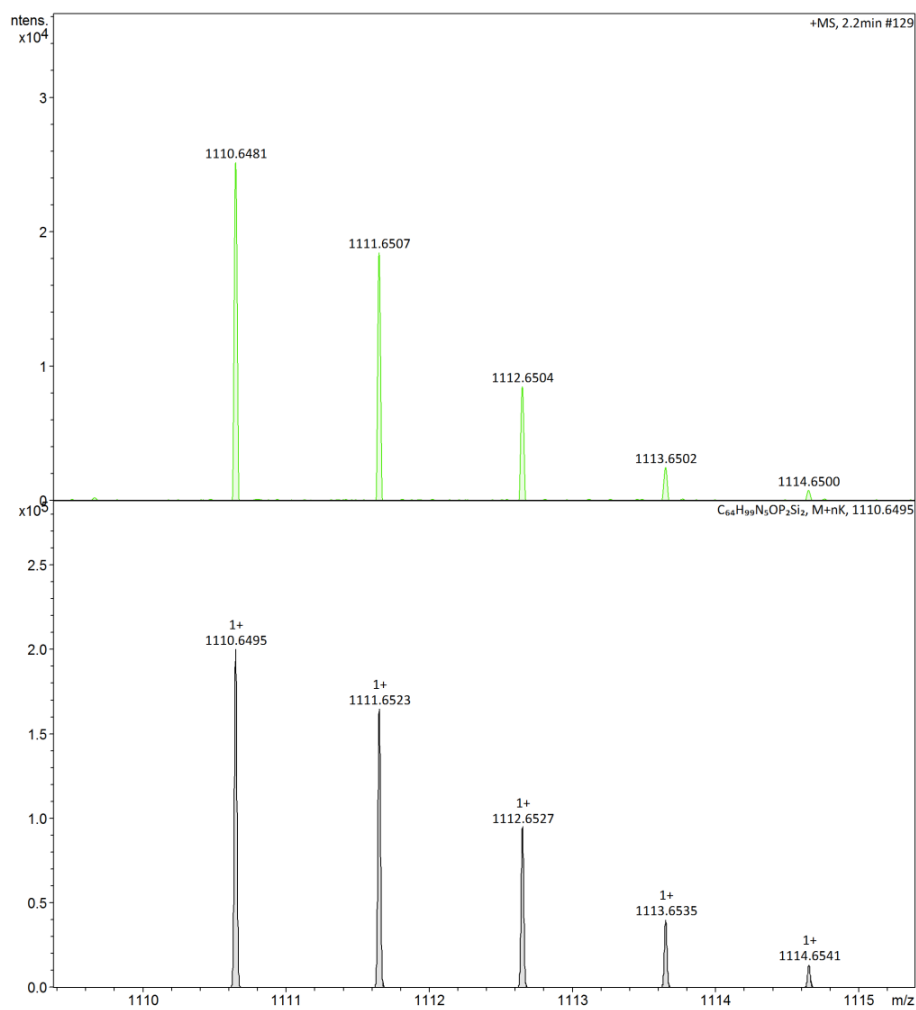

**Figure S58.** HRMS of **8a**.

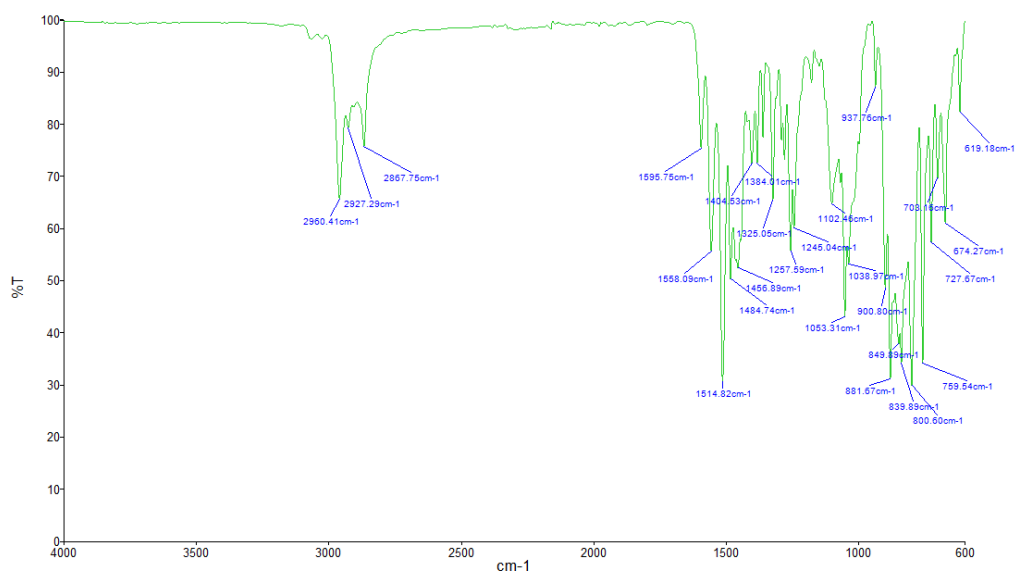

**Figure S59.** IR spectrum of **8a**.

### Synthesis of **S1**:

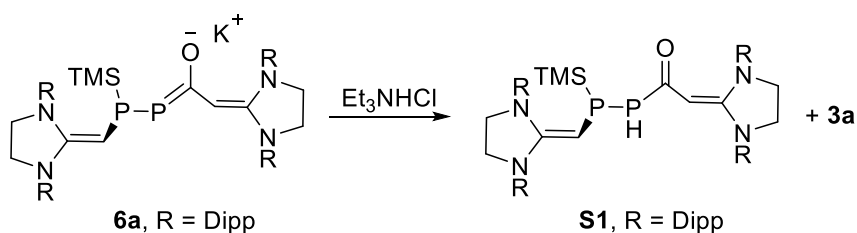

Triethylamine hydrochloride ( $\text{Et}_3\text{NHCl}$ ) (2 mg) was added slowly to a stirred solution of **6a** (20 mg) in tetrahydrofuran (0.5 mL) at room temperature. After stirring for 0.5 h, monitor the solution  $^{31}\text{P}\{^1\text{H}\}$  and  $^{31}\text{P}$  NMR signal.  $^{31}\text{P}\{^1\text{H}\}$  NMR (242.9 MHz, tetrahydrofuran):  $\delta = 485.4$  (d,  $^1J_{\text{PP}} = 530.6$  Hz), 381.63 (d,  $^1J_{\text{PP}} = 530.6$  Hz), 35.8 (d,  $^1J_{\text{PP}} = 158.2$  Hz, (TMS)*P*-PH), -39.1 (d,  $^1J_{\text{PP}} = 158.2$  Hz, (TMS)*P*-PH).  $^{31}\text{P}$  NMR (242.9 MHz, tetrahydrofuran):  $\delta = 35.8$  (d,  $^1J_{\text{PP}} = 158.2$  Hz, (TMS)*P*-PH), -39.1 (d,  $^1J_{\text{PP}} = 158.2$  Hz,  $^1J_{\text{PH}} = 202.8$  Hz, (TMS)*P*-PH).

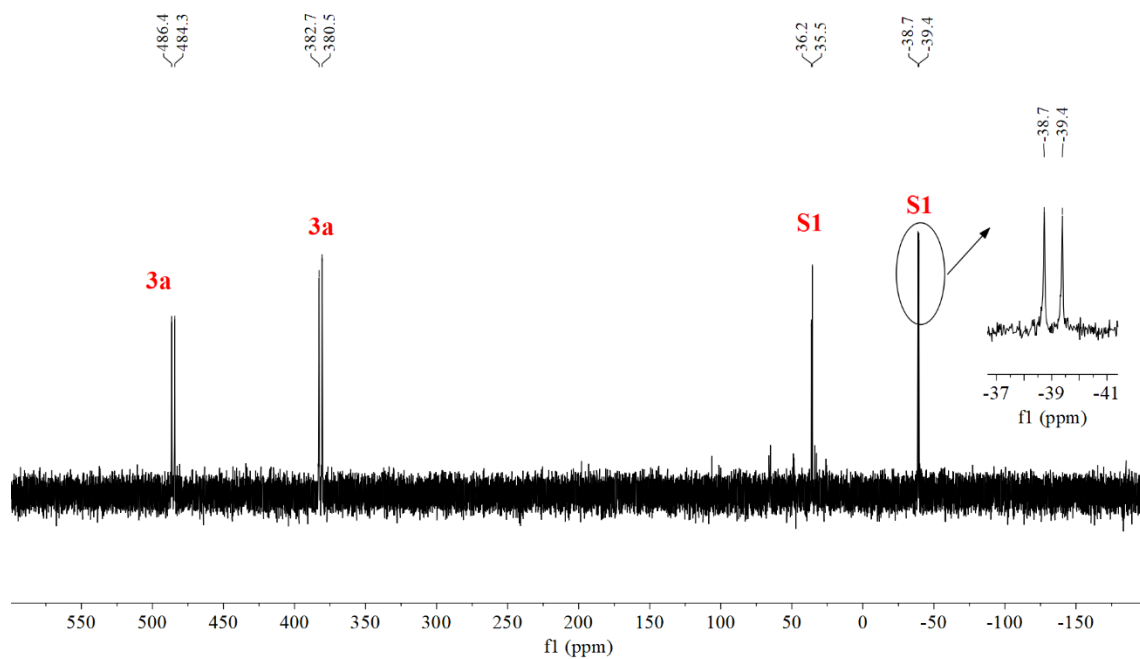

**Figure S60.**  $^{31}\text{P}\{^1\text{H}\}$  NMR of the reaction between **6a** and  $\text{Et}_3\text{NHCl}$  in tetrahydrofuran.

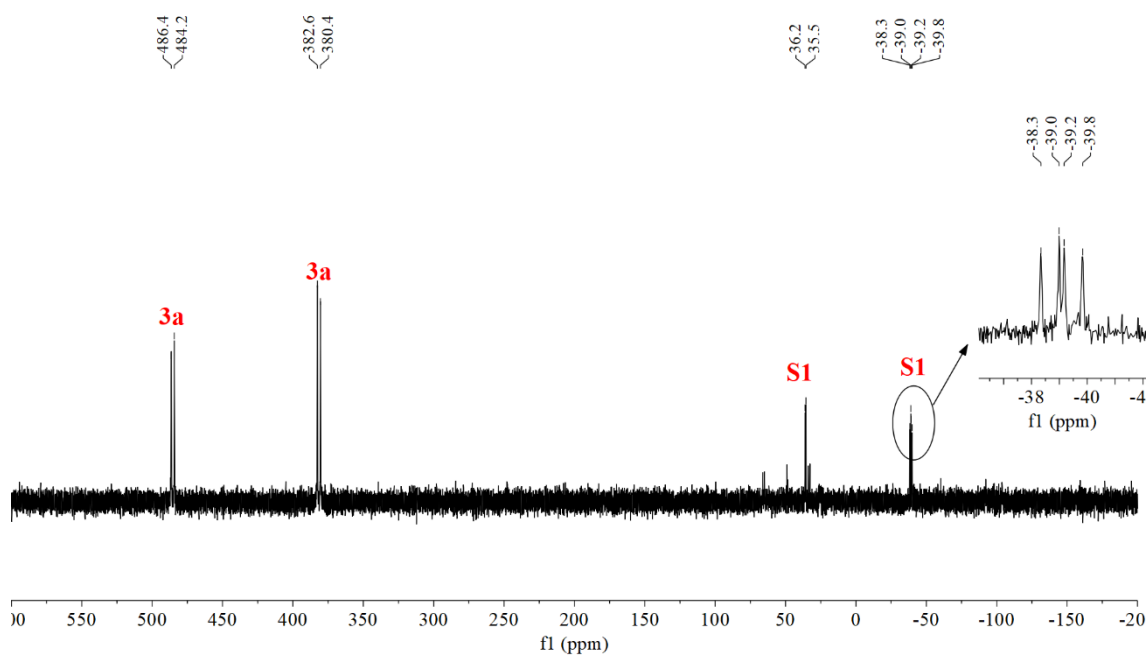

**Figure S61.**  $^{31}\text{P}$  NMR of the reaction between **6a** and  $\text{Et}_3\text{NHCl}$  in tetrahydrofuran.

**Synthesis of 6b:**

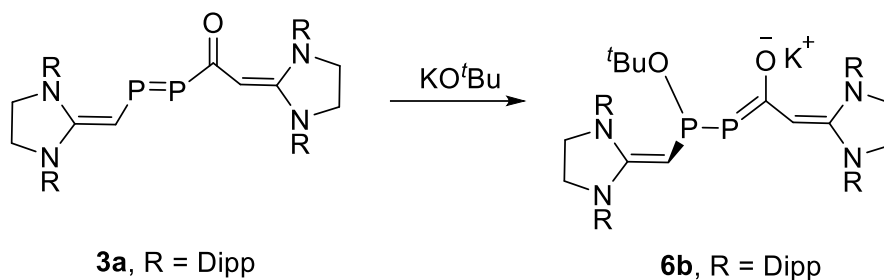

Potassium *tert*-butoxide (*t*BuOK) (37 mg, 0.3 mmol) in tetrahydrofuran (4 mL) was added to a stirred solution of **3a** (300 mg, 0.3 mmol) in tetrahydrofuran (12 mL) at room temperature. After stirring for 0.5 hour, the solvent was removed under reduced pressure. Then, the residue was washed with hexane (2 × 2 mL) and dried *in vacuo* to afford **6b** (314 mg, yield = 93 %) as a yellow powder. M. p. = 113.6 °C (Decomposition). <sup>1</sup>H NMR (400.1 MHz, C<sub>6</sub>D<sub>6</sub>): δ = 7.14~7.11 (3 H, C<sub>Ar</sub>H), 7.08~7.03 (4 H, C<sub>Ar</sub>H), 6.98~6.89 (3 H, C<sub>Ar</sub>H), 6.88~6.86 (2 H, C<sub>Ar</sub>H), 4.90 (s, 1 H, =CHC(O)-), 4.02 (br., 1 H, =CHPP-), 3.69 (m, 2 H, NCH<sub>2</sub>), 3.64 (m, 1 H, CH(CH<sub>3</sub>)<sub>3</sub>), 3.50 (m, 4 H, CH(CH<sub>3</sub>)<sub>3</sub>), 3.39~3.28 (m, 3 H, CH(CH<sub>3</sub>)<sub>3</sub> & 4 H, NCH<sub>2</sub>), 3.17 (m, 2 H, NCH<sub>2</sub>), 1.51 (d, *J* = 6.7 Hz, 3 H, CH(CH<sub>3</sub>)<sub>2</sub>), 1.49~1.43 (m, 9 H, CH(CH<sub>3</sub>)<sub>2</sub>), 1.41~1.38 (m, 6 H, CH(CH<sub>3</sub>)<sub>2</sub>), 1.36~1.32 (m, 6 H, CH(CH<sub>3</sub>)<sub>2</sub> & 9 H, -OC(CH<sub>3</sub>)<sub>3</sub>), 1.31 (d, *J* = 6.9 Hz, 3 H, CH(CH<sub>3</sub>)<sub>2</sub>), 1.27~1.22 (m, 18 H, CH(CH<sub>3</sub>)<sub>2</sub>), 1.20~1.17 (m, 6 H, CH(CH<sub>3</sub>)<sub>2</sub>). <sup>13</sup>C{<sup>1</sup>H} NMR (150.8 MHz, C<sub>6</sub>D<sub>6</sub>): δ = 219.1 (m, PPCO<sup>-</sup>), 151.7 (br., PPC(O<sup>-</sup>)CH=C), 150.8 (br., PPCH=C), 150.1 (C<sub>Ar</sub>), 149.5 (C<sub>Ar</sub>), 148.7 (C<sub>Ar</sub>), 148.3 (C<sub>Ar</sub>), 147.5 (C<sub>Ar</sub>), 144.6 (C<sub>Ar</sub>), 143.4 (C<sub>Ar</sub>), 136.6 (C<sub>Ar</sub>), 125.2 (C<sub>Ar</sub>), 124.7 (C<sub>Ar</sub>), 124.4 (C<sub>Ar</sub>), 124.3 (OC(CH<sub>3</sub>)<sub>3</sub>), 123.0 (C<sub>Ar</sub>), 88.3 (d (br.), <sup>2</sup>J<sub>PC</sub> = 69.8 Hz, PPC(O<sup>-</sup>)CH=), 74.8 (br., PPCH=), 53.5 (NCH<sub>2</sub>), 52.4 (NCH<sub>2</sub>), 50.0 (NCH<sub>2</sub>), 49.9 (NCH<sub>2</sub>), 31.7, 31.6, 29.1, 29.0, 28.9, 28.8, 28.7, 28.7, 28.6, 28.5, 25.8, 25.4, 25.3, 25.2, 25.2, 25.1, 25.0, 25.0, 24.9, 24.6, 24.6, 24.5, 24.5, 24.4, 24.3. <sup>31</sup>P{<sup>1</sup>H} NMR (242.9 MHz, C<sub>6</sub>D<sub>6</sub>): δ = 104.9 (d, <sup>1</sup>J<sub>PP</sub> = 301.8 Hz, PPC(O<sup>-</sup>)), 82.1 (br., PPC(O<sup>-</sup>)). <sup>31</sup>P{<sup>1</sup>H} NMR (242.9 MHz, tetrahydrofuran): δ = 107.6 (d, <sup>1</sup>J<sub>PP</sub> = 301.8 Hz, PPC(O<sup>-</sup>)), 82.1 (d, <sup>1</sup>J<sub>PP</sub> = 301.8 Hz, PPC(O<sup>-</sup>)). UV/Vis (toluene, λ (nm) ε (M<sup>-1</sup>cm<sup>-1</sup>)): 327.5 (14384), 423.5 (15269), 515.0 (3582). HRMS (ESI, m/z) calc. for: C<sub>61</sub>H<sub>87</sub>N<sub>4</sub>O<sub>2</sub>P<sub>2</sub><sup>-</sup>: 969.6310 [M]<sup>-</sup>; found: not detected. IR (ATR, cm<sup>-1</sup>): 2961, 2928, 2868, 1504, 1455, 1324, 805.

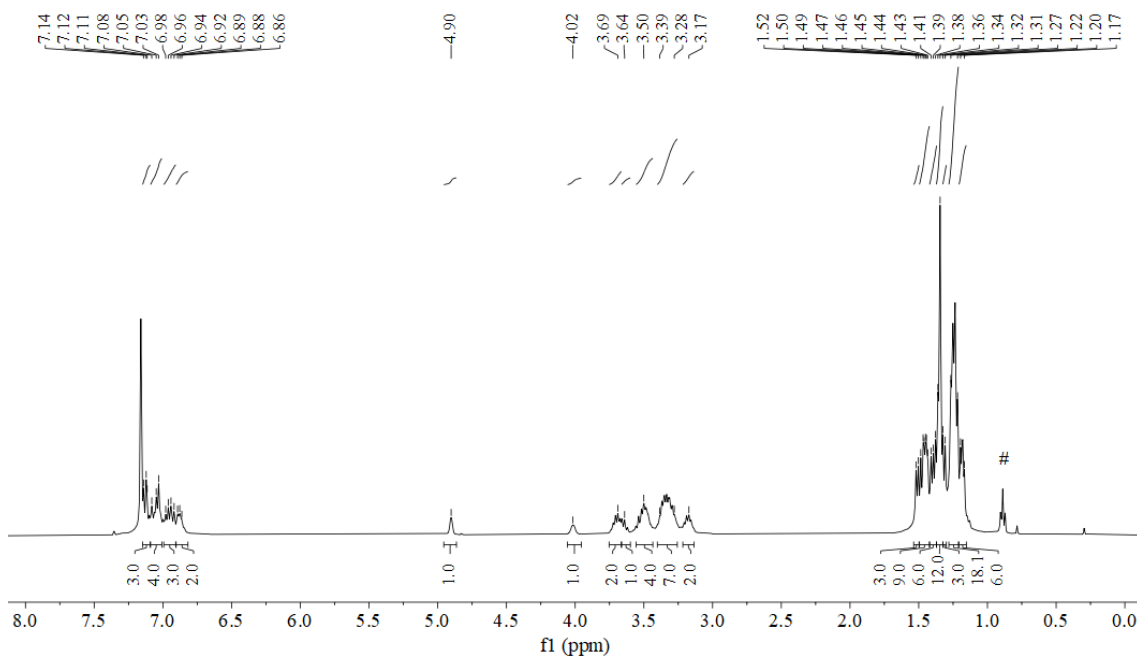

Figure S62.  $^1\text{H}$  NMR of **6b** in  $\text{C}_6\text{D}_6$ . #Hexane.

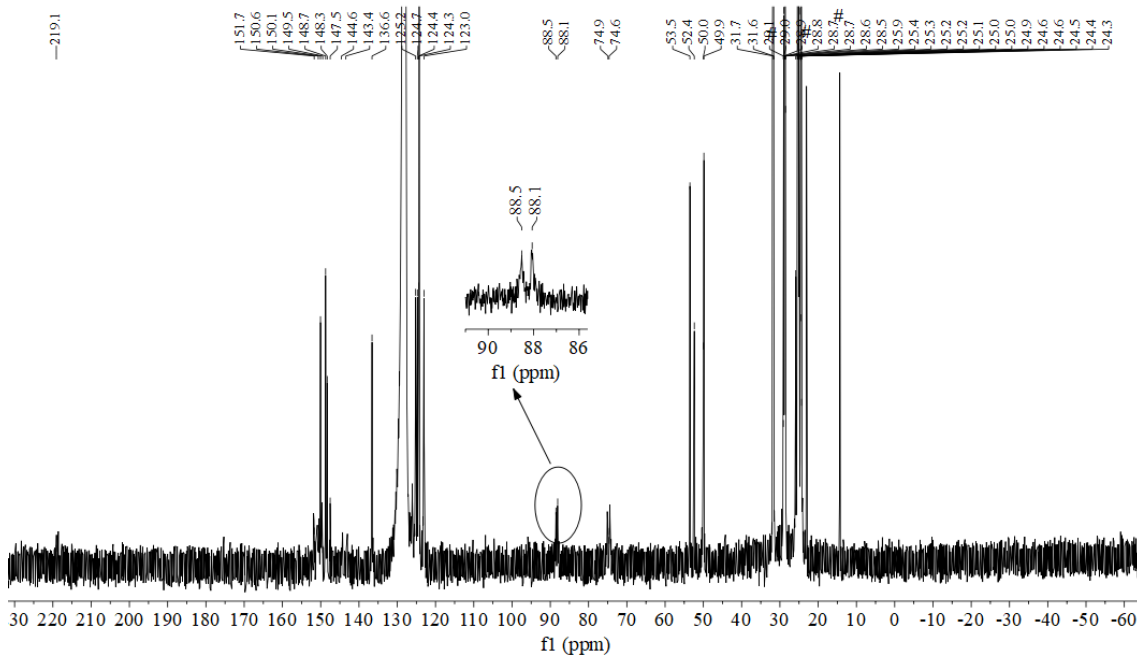

Figure S63.  $^{13}\text{C}\{^1\text{H}\}$  NMR of **6b** in  $\text{C}_6\text{D}_6$ . #Hexane.

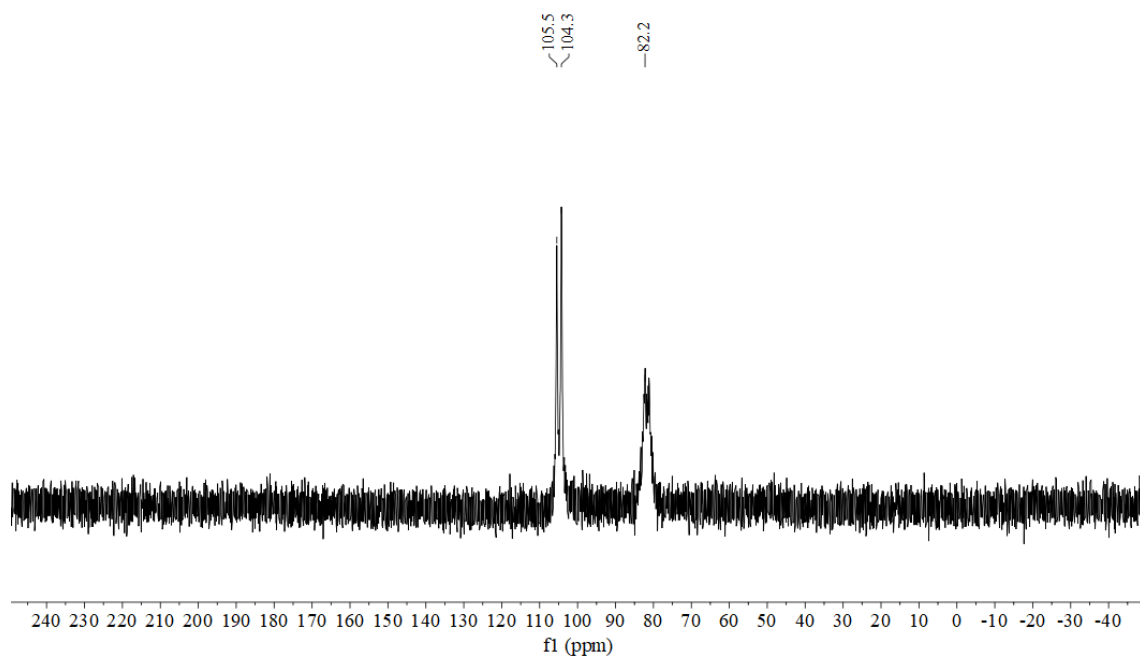

*Figure S64.*  $^{31}\text{P}\{^1\text{H}\}$  NMR of **6b** in  $\text{C}_6\text{D}_6$ .

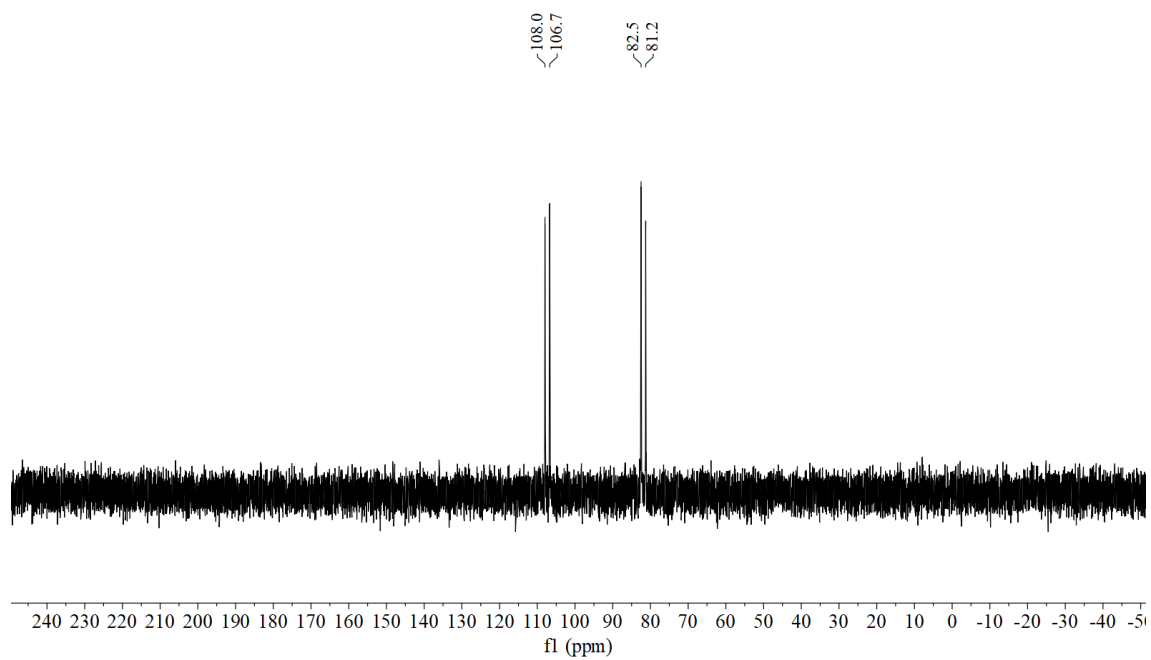

*Figure S65.*  $^{31}\text{P}\{^1\text{H}\}$  NMR of **6b** in tetrahydrofuran.

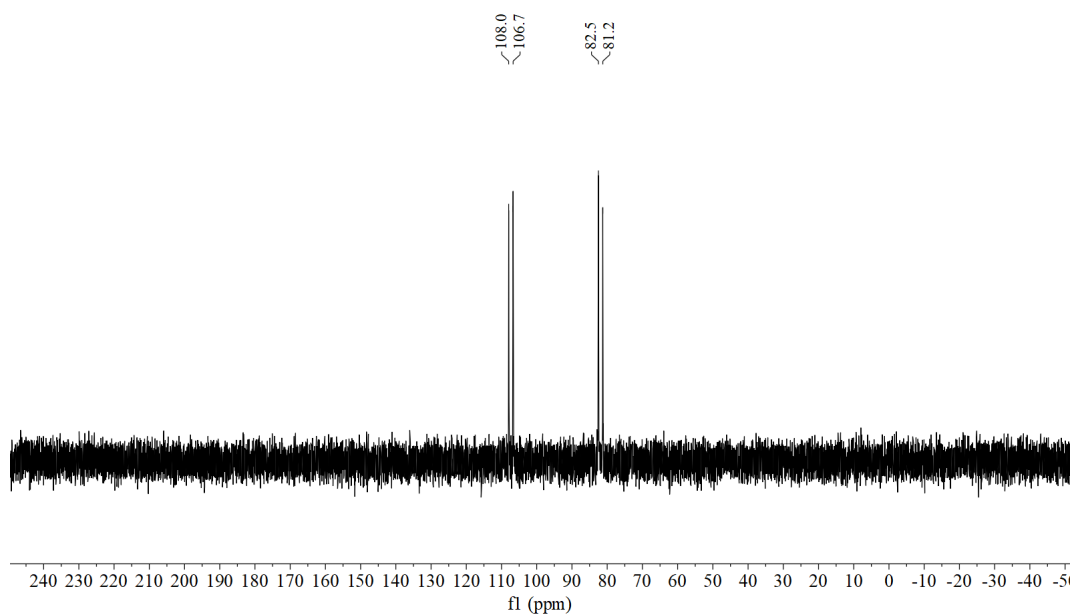

**Figure S66.**  $^{31}\text{P}$  NMR of **6b** in tetrahydrofuran.

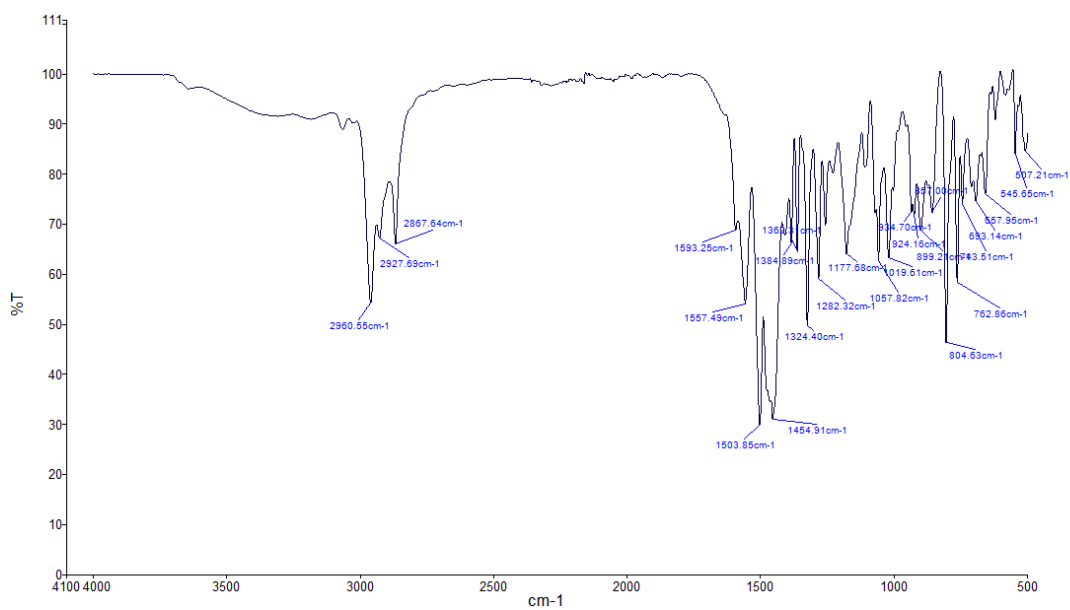

**Figure S67.** IR spectrum of **6a**.

### Synthesis of **7b**:

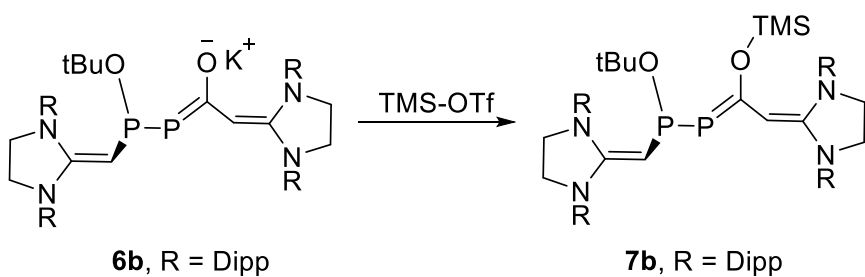

Trimethylsilyl trifluoromethanesulfonate (TMS-OTf) (66 mg, 0.3 mmol) in tetrahydrofuran (4 mL) was added to the solution of **6b** (300 mg, 0.3 mmol) in tetrahydrofuran (12 mL) at room temperature. After stirring for 0.5 h, the solvent was removed under reduced pressure, and the residue was extracted with hexane (20 mL). Then, the residue was washed with acetonitrile (1 mL) and dried *in vacuo* to afford **7b** (156 mg, yield = 52 %) as an orange powder. Orange crystals of **7b** were obtained from a saturated acetonitrile solution stored at -30 °C for 5 days. M. p. = 154.3 °C (Decomposition). <sup>1</sup>H NMR (400.1 MHz, C<sub>6</sub>D<sub>6</sub>): δ = 7.38 (t, *J* = 7.6 Hz, 1 H, C<sub>Ar</sub>H), 7.28 (d, *J* = 7.8 Hz, 2 H, C<sub>Ar</sub>H), 7.20~7.19 (m, 4 H, C<sub>Ar</sub>H), 7.12~7.08 (m, 4 H, C<sub>Ar</sub>H), 6.98 (t, *J* = 7.4 Hz, C<sub>Ar</sub>H), 3.84 (s, 1 H, P=C-CH=), 3.76 (m, 1 H, PP-CH=), 3.53 (m, 4 H, NCH<sub>2</sub>), 3.40 (m, 8 H, NCH<sub>2</sub> & CH(CH<sub>3</sub>)<sub>2</sub>), 3.25 (m, 2 H, CH(CH<sub>3</sub>)<sub>2</sub>), 3.16 (m, 1 H, CH(CH<sub>3</sub>)<sub>2</sub>), 3.07 (m, 1 H, CH(CH<sub>3</sub>)<sub>2</sub>), 1.59~1.55 (m, 9 H, CH(CH<sub>3</sub>)<sub>2</sub>), 1.44~1.40 (m, 6 H, CH(CH<sub>3</sub>)<sub>2</sub>), 1.37~1.25 (m, 24 H, CH(CH<sub>3</sub>)<sub>2</sub>), 1.22~1.17 (m, 9 H, CH(CH<sub>3</sub>)<sub>2</sub>), 1.03 (s, 9 H, -OC(CH<sub>3</sub>)<sub>3</sub>), 0.02 (s, 9 H, -Si(CH<sub>3</sub>)<sub>3</sub>). <sup>13</sup>C{<sup>1</sup>H} NMR (100.5 MHz, C<sub>6</sub>D<sub>6</sub>): δ = 196.1 (dd, <sup>1</sup>*J*<sub>PC</sub> = 77.9 Hz, <sup>2</sup>*J*<sub>PC</sub> = 11.8 Hz, P-P=C(O)-), 157.00 (d, <sup>3</sup>*J*<sub>PC</sub> = 3.2 Hz, NCN), 156.0 (dd, <sup>2</sup>*J*<sub>PC</sub> = 32.1 Hz, <sup>3</sup>*J*<sub>PC</sub> = 16.2 Hz, NCN), 149.9 (C<sub>Ar</sub>), 149.2 (C<sub>Ar</sub>), 148.7 (C<sub>Ar</sub>), 148.6 (C<sub>Ar</sub>), 148.4 (C<sub>Ar</sub>), 148.4 (C<sub>Ar</sub>), 147.9 (C<sub>Ar</sub>), 147.7 (C<sub>Ar</sub>), 145.5 (C<sub>Ar</sub>), 139.9 (C<sub>Ar</sub>), 139.9 (C<sub>Ar</sub>), 139.0 (C<sub>Ar</sub>), 136.9 (C<sub>Ar</sub>), 136.5 (C<sub>Ar</sub>), 128.9 (C<sub>Ar</sub>), 128.6 (C<sub>Ar</sub>), 128.1 (C<sub>Ar</sub>), 127.9 (C<sub>Ar</sub>), 125.2 (C<sub>Ar</sub>), 124.9 (C<sub>Ar</sub>), 124.8 (C<sub>Ar</sub>), 124.7 (C<sub>Ar</sub>), 124.5 (C<sub>Ar</sub>), 124.2 (C<sub>Ar</sub>), 86.4 (d, <sup>2</sup>*J*<sub>PC</sub> = 20.1 Hz, -P-O-C(CH<sub>3</sub>)<sub>3</sub>), 73.3 (d, <sup>2</sup>*J*<sub>PC</sub> = 4.2 Hz, -P-O-C(CH<sub>3</sub>)<sub>3</sub>), 72.5 (dd, <sup>1</sup>*J*<sub>PC</sub> = 43.5 Hz, <sup>2</sup>*J*<sub>PC</sub> = 13.8 Hz, =CH-PP), 54.6(NCH<sub>2</sub>), 52.5 (NCH<sub>2</sub>), 50.0 (NCH<sub>2</sub>), 49.3 (NCH<sub>2</sub>), 30.8 (d, <sup>3</sup>*J*<sub>PC</sub> = 7.6 Hz, -OC(CH<sub>3</sub>)<sub>3</sub>), 29.0, 29.0, 28.9, 28.8, 28.7, 28.7, 28.6, 28.2, 26.7, 26.1, 25.9, 25.7, 25.7, 25.5, 25.4, 25.1, 25.0, 24.8, 24.7, 24.7, 24.6, 24.6, 24.5, 23.5, 1.3 (-Si(CH<sub>3</sub>)<sub>3</sub>). <sup>31</sup>P{<sup>1</sup>H} NMR (242.9 MHz, C<sub>6</sub>D<sub>6</sub>): δ = 148.2 (d, <sup>1</sup>*J*<sub>PP</sub> = 247.2 Hz, PP-C(OTMS)), 87.6 (d, <sup>1</sup>*J*<sub>PP</sub> = 247.2 Hz, PP-C(OTMS)). <sup>31</sup>P NMR (242.9 MHz, C<sub>6</sub>D<sub>6</sub>): δ = 148.2 (d, <sup>1</sup>*J*<sub>PP</sub> = 247.2 Hz, PP-C(OTMS)), 87.6 (d, <sup>1</sup>*J*<sub>PP</sub> = 247.2 Hz, PP-C(OTMS)). UV/Vis (toluene, λ (nm) ε (M<sup>-1</sup>cm<sup>-1</sup>)): 331.0 (6804), 432.0 (8996). HRMS (ESI, m/z) calc. for: C<sub>61</sub>H<sub>87</sub>N<sub>4</sub>O<sub>2</sub>P<sub>2</sub>SiC<sub>3</sub>H<sub>9</sub>: 1043.6851 [M + H]<sup>+</sup>; found: 1043.6777. IR (ATR, cm<sup>-1</sup>): 2961, 2928, 2868, 1504, 1455, 805.



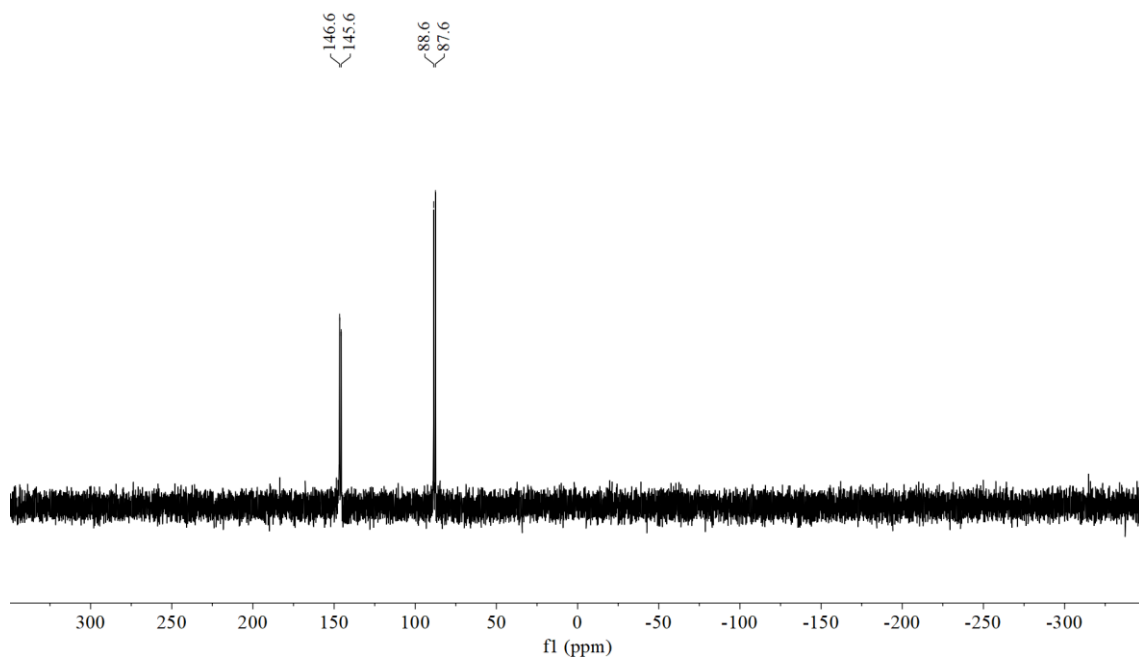

**Figure S68.**  $^{31}\text{P}\{^1\text{H}\}$  NMR of the reaction mixture for the preparation of **7b** in tetrahydrofuran, the NMR spectroscopic yield is nearly quantitative.

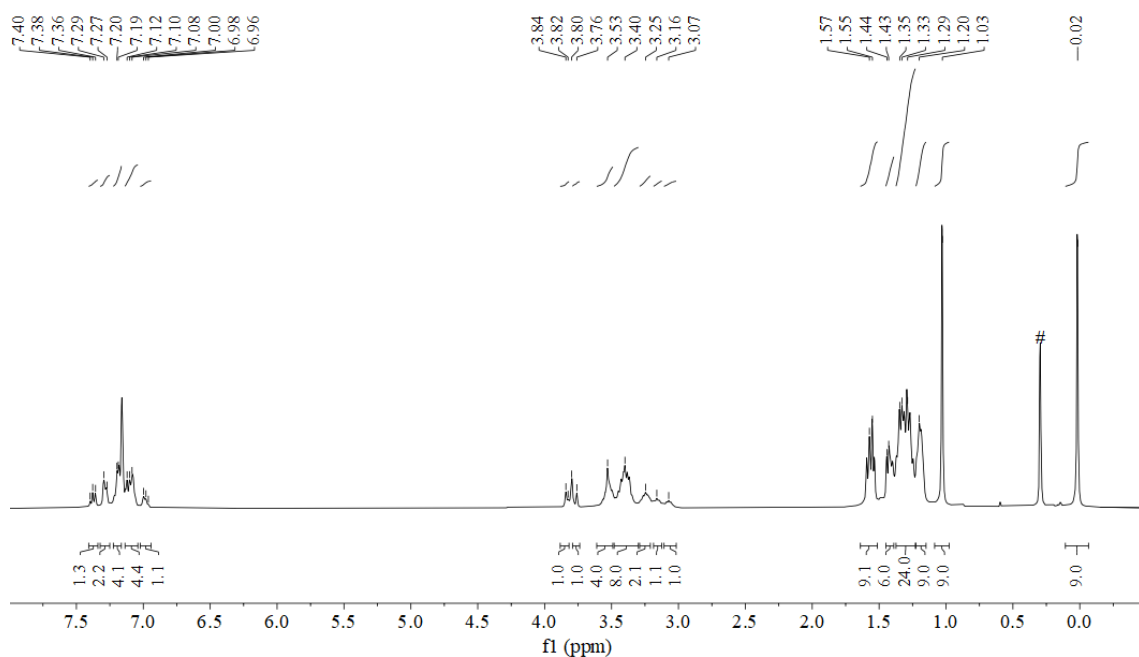

**Figure S69.**  $^1\text{H}$  NMR of **7b** in  $\text{C}_6\text{D}_6$ . #Silicone grease.

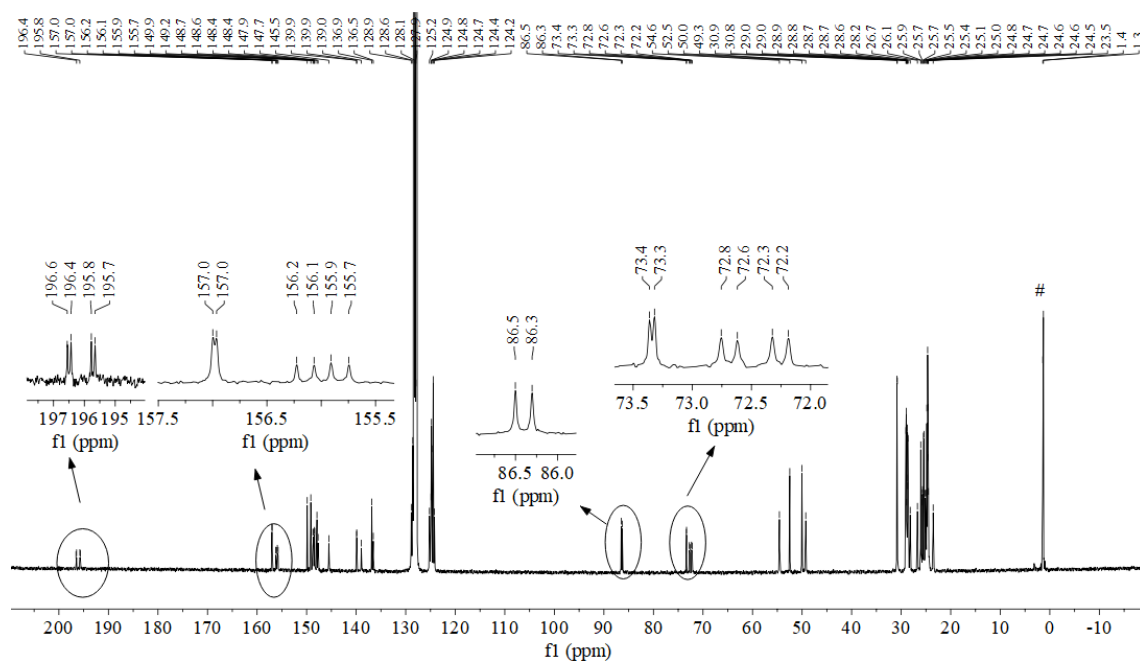

**Figure S70.**  $^{13}\text{C}\{^1\text{H}\}$  NMR of **7b** in  $\text{C}_6\text{D}_6$ . #Silicone grease.

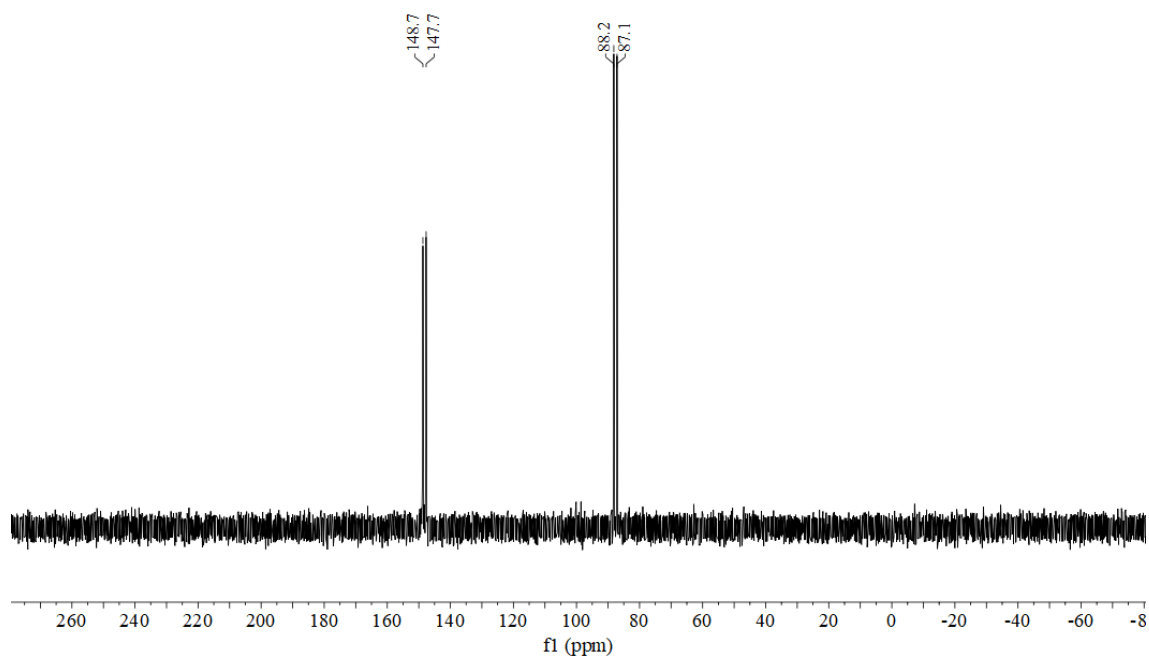

**Figure S71.**  $^{31}\text{P}\{^1\text{H}\}$  NMR of **7b** in  $\text{C}_6\text{D}_6$ .

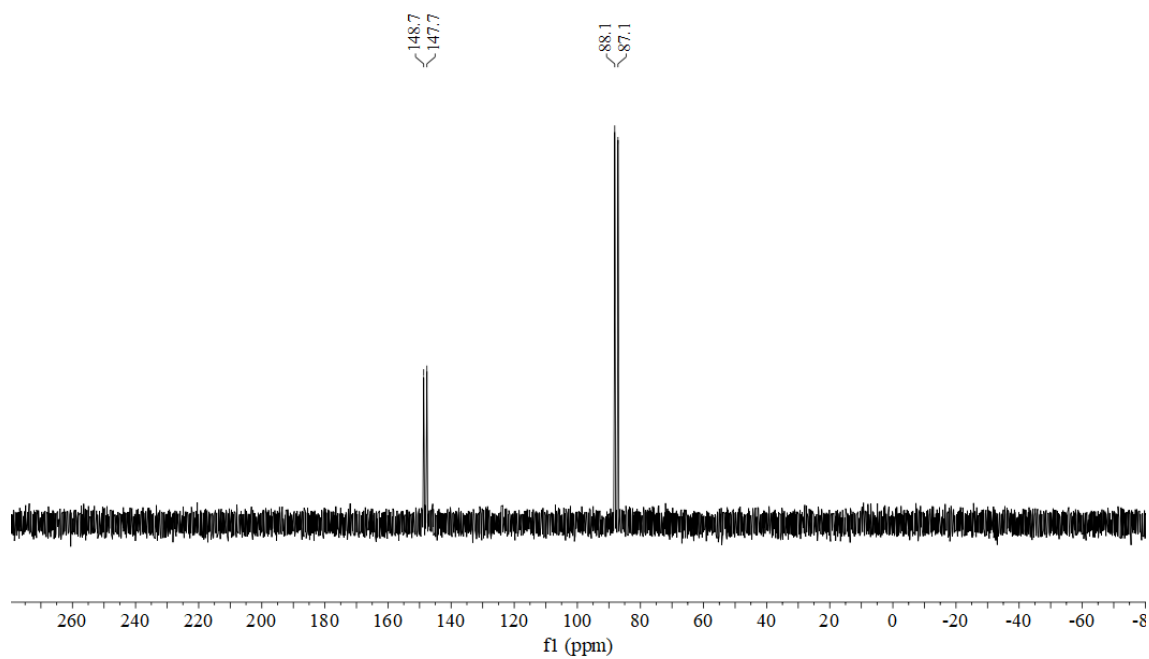

**Figure S72.** <sup>31</sup>P NMR of **7b** in C<sub>6</sub>D<sub>6</sub>.

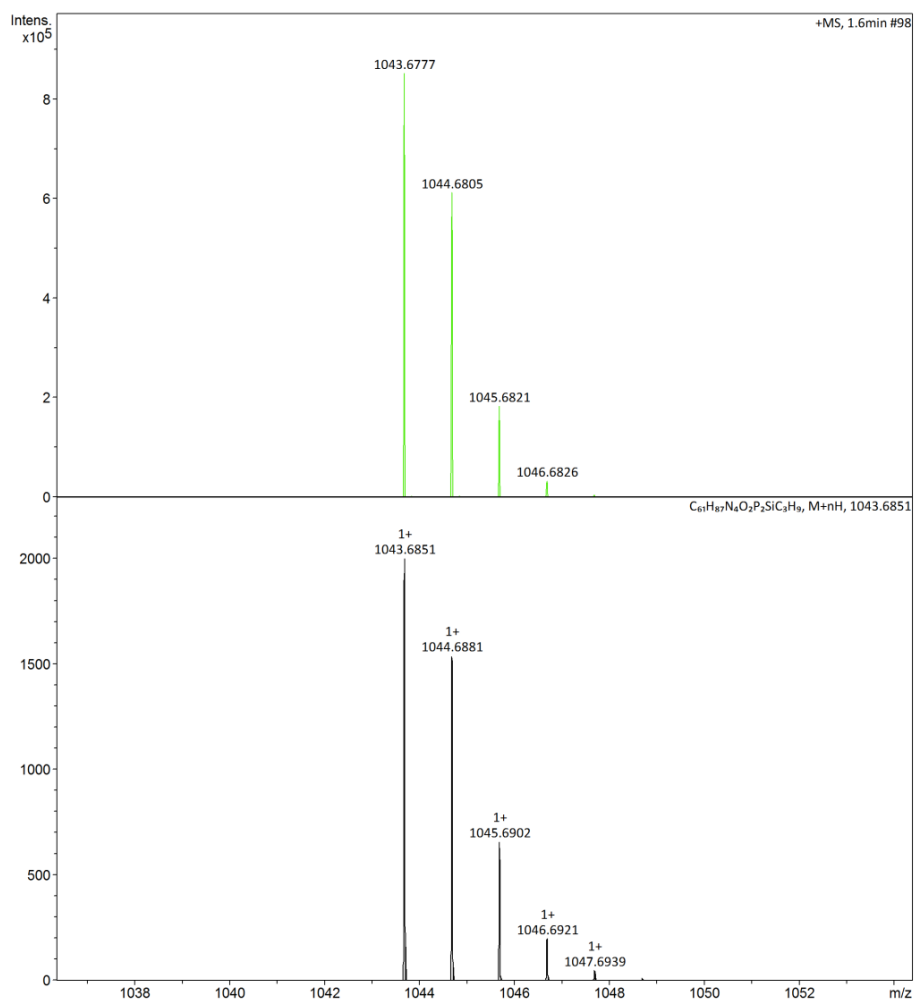

**Figure S73.** HRMS of **7b**.

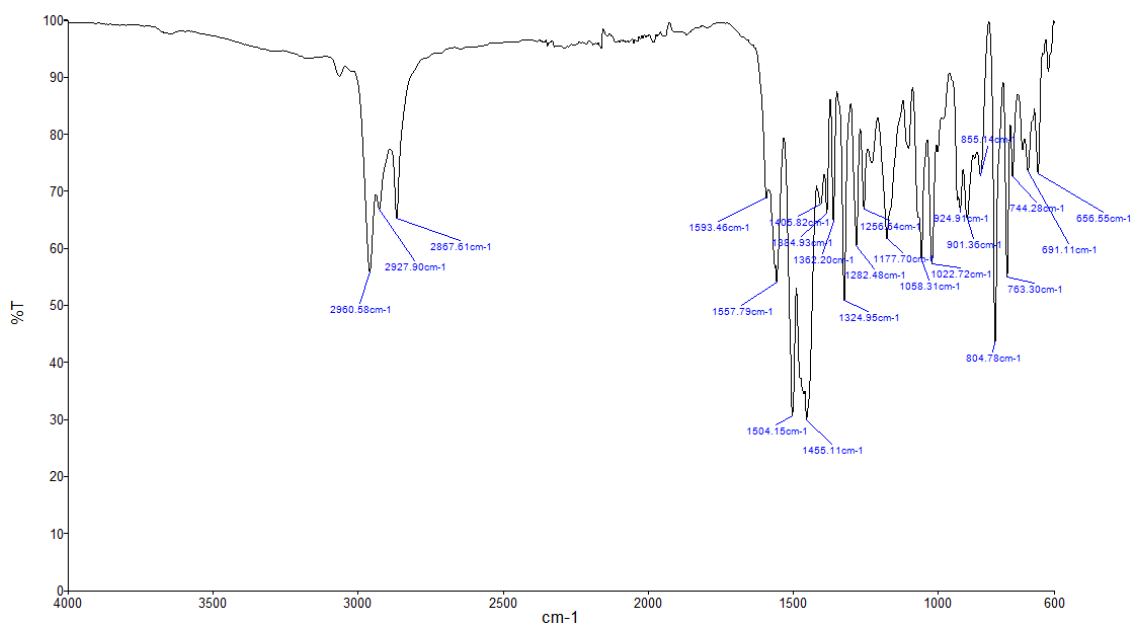

**Figure S74.** IR spectrum of **7b**.

### Synthesis of **8b**:

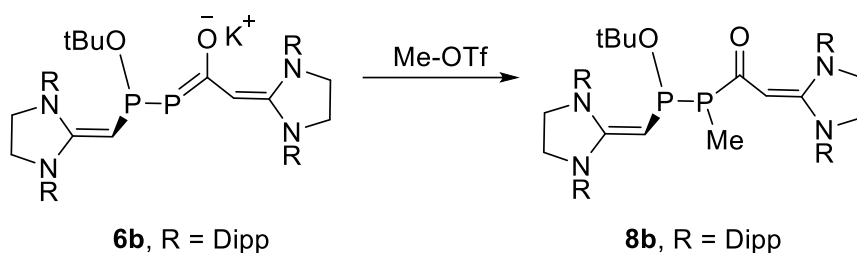

Methyl trifluoromethanesulfonate (Me-OTf) (49 mg, 0.3 mmol) in tetrahydrofuran (4 mL) was added to a stirred solution of **6b** (300 mg, 0.3 mmol) in tetrahydrofuran (12 mL) at room temperature. After stirring for 0.5 h, the solvent was removed under reduced pressure. Then, the residue was extracted with hexane (20 mL), washed with acetonitrile (1 mL) and dried *in vacuo* to afford **8b** (167 mg, yield = 56 %) as a yellow powder. M. p. = 133.5 °C (Decomposition).  $^1\text{H NMR}$  (400.1 MHz,  $\text{C}_6\text{D}_6$ ):  $\delta$  = 7.22 (t,  $J$  = 7.7 Hz, 3 H,  $\text{C}_{\text{Ar}}\text{H}$ ), 7.14~7.08 (m, 6 H,  $\text{C}_{\text{Ar}}\text{H}$ ), 7.04 (d,  $J$  = 7.3 Hz, 3 H,  $\text{C}_{\text{Ar}}\text{H}$ ), 4.52 (s, 1 H,  $\text{C}(\text{O})\text{CH}=\text{C}$ ), 3.57 (m, 2 H,  $\text{NCH}_2$ ), 3.38 (m, 6 H,  $\text{NCH}_2$ ), 3.26 (m, 8 H,  $\text{CH}_2(\text{CH}_3)_2$ ), 3.10 (br., 1 H,  $=\text{CHPP}$ ), 1.50 (d,  $J$  = 6.8 Hz, 3 H,  $\text{CH}(\text{CH}_3)_2$ ), 1.44 (br., 6 H,  $\text{CH}(\text{CH}_3)_2$ ), 1.34 (m, 9 H,  $\text{CH}(\text{CH}_3)_2$ ), 1.27 (br., 15 H,  $\text{CH}(\text{CH}_3)_2$ ), 1.21~1.18 (m, 12 H,  $\text{CH}(\text{CH}_3)_2$ ), 1.16 (d,  $J$  = 6.9 Hz, 3 H,  $\text{CH}(\text{CH}_3)_2$ ), 1.05 (s, 9 H,  $\text{C}(\text{CH}_3)_3$ ), 0.96 (m, 3 H,  $\text{P}(\text{CH}_3)$ ).  $^{13}\text{C}\{^1\text{H}\}$  NMR (150.8 MHz,  $\text{C}_6\text{D}_6$ ):  $\delta$  = 197.8 (d,  $^1J_{\text{PC}}$  = 34.1 Hz,  $\text{PC}(\text{O})$ ), 155.6 (d,  $^3J_{\text{PC}}$  = 15.6 Hz,  $\text{PC}(\text{O})\text{CH}=\text{C}$ ), 153.6 (m,  $\text{C}=\text{CHP}(\text{O}^t\text{Bu})\text{P}$ ), 149.2

(C<sub>Ar</sub>), 149.0 (C<sub>Ar</sub>), 148.4 (C<sub>Ar</sub>), 148.1 (C<sub>Ar</sub>), 145.9 (C<sub>Ar</sub>), 145.3 (C<sub>Ar</sub>), 139.6 (C<sub>Ar</sub>), 138.8 (C<sub>Ar</sub>), 136.0 (C<sub>Ar</sub>), 135.1 (C<sub>Ar</sub>), 129.4 (C<sub>Ar</sub>), 125.0 (C<sub>Ar</sub>), 124.7 (C<sub>Ar</sub>), 124.6 (C<sub>Ar</sub>), 124.5 (C<sub>Ar</sub>), 124.0 (C<sub>Ar</sub>), 123.9 (C<sub>Ar</sub>), 123.6 (C<sub>Ar</sub>), 83.5 (d, <sup>2</sup>J<sub>PC</sub> = 64.4 Hz, =CHC(O)P), 73.3 (m, =CHPP), 66.9 (m, PP(OC(CH<sub>3</sub>)<sub>3</sub>)), 53.5 (NCH<sub>2</sub>), 52.0 (NCH<sub>2</sub>), 49.9 (NCH<sub>2</sub>), 49.9 (NCH<sub>2</sub>), 30.8 (d, <sup>3</sup>J<sub>PC</sub> = 8.1 Hz, P(OC(CH<sub>3</sub>)<sub>3</sub>)), 29.3, 29.0, 28.8, 28.7, 28.7, 28.5, 26.4, 25.6, 25.2, 25.0, 24.8, 24.6, 24.5, 23.8, -1.5 (d, <sup>1</sup>J<sub>PC</sub> = 25.9 Hz, P(CH<sub>3</sub>)). <sup>31</sup>P NMR (242.9 MHz, C<sub>6</sub>D<sub>6</sub>): δ = 90.1 (d, <sup>1</sup>J<sub>PP</sub> = 311.0 Hz, PP(CH<sub>3</sub>)C(O)), 5.3 (d, <sup>1</sup>J<sub>PP</sub> = 311.0 Hz, PP(CH<sub>3</sub>)C(O)). <sup>31</sup>P{<sup>1</sup>H} NMR (242.9 MHz, C<sub>6</sub>D<sub>6</sub>): δ = 90.1 (d, <sup>1</sup>J<sub>PP</sub> = 311.0 Hz, PP(CH<sub>3</sub>)C(O)), 5.3 (d, <sup>1</sup>J<sub>PP</sub> = 311.0 Hz, PP(CH<sub>3</sub>)C(O)). UV/Vis (toluene, λ (nm) ε (M<sup>-1</sup>cm<sup>-1</sup>)): 332.5 (77091.0). HRMS (ESI, m/z) calc. for: C<sub>62</sub>H<sub>90</sub>N<sub>4</sub>O<sub>2</sub>P<sub>2</sub>: 985.6621 [M + H]<sup>+</sup>; found: 985.6621. IR (ATR, cm<sup>-1</sup>): 2961, 2926, 2866, 1510, 1054, 805, 764, 795.

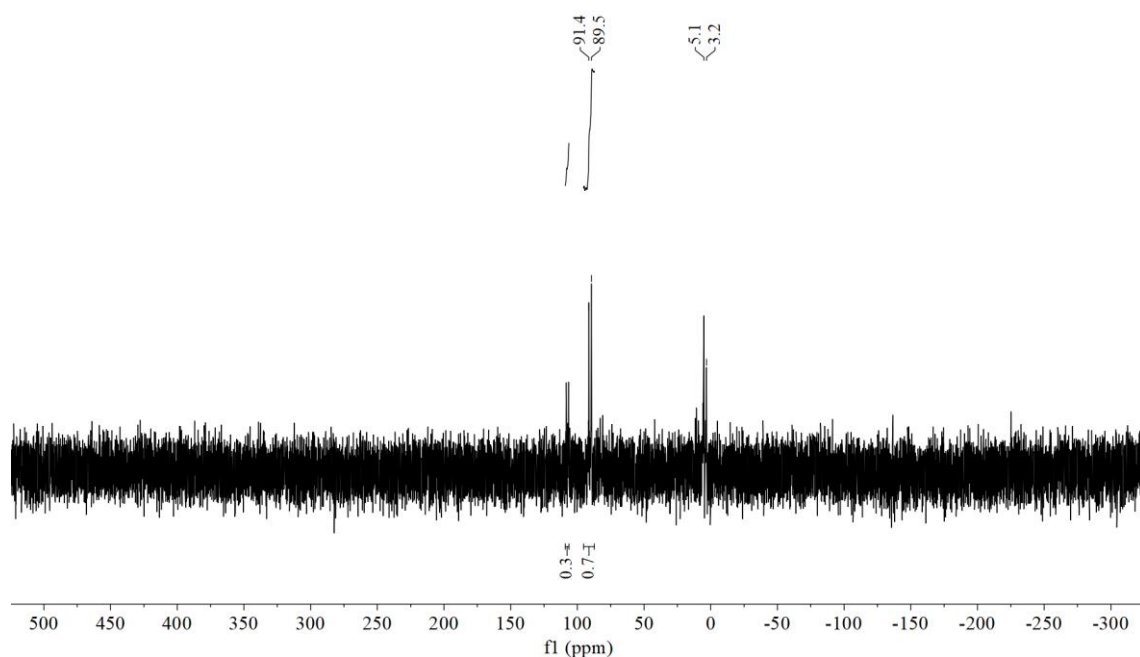

**Figure S75.** <sup>31</sup>P{<sup>1</sup>H} NMR of the reaction mixture for the preparation of **8b** in THF, the NMR spectroscopic yield is about 70%.

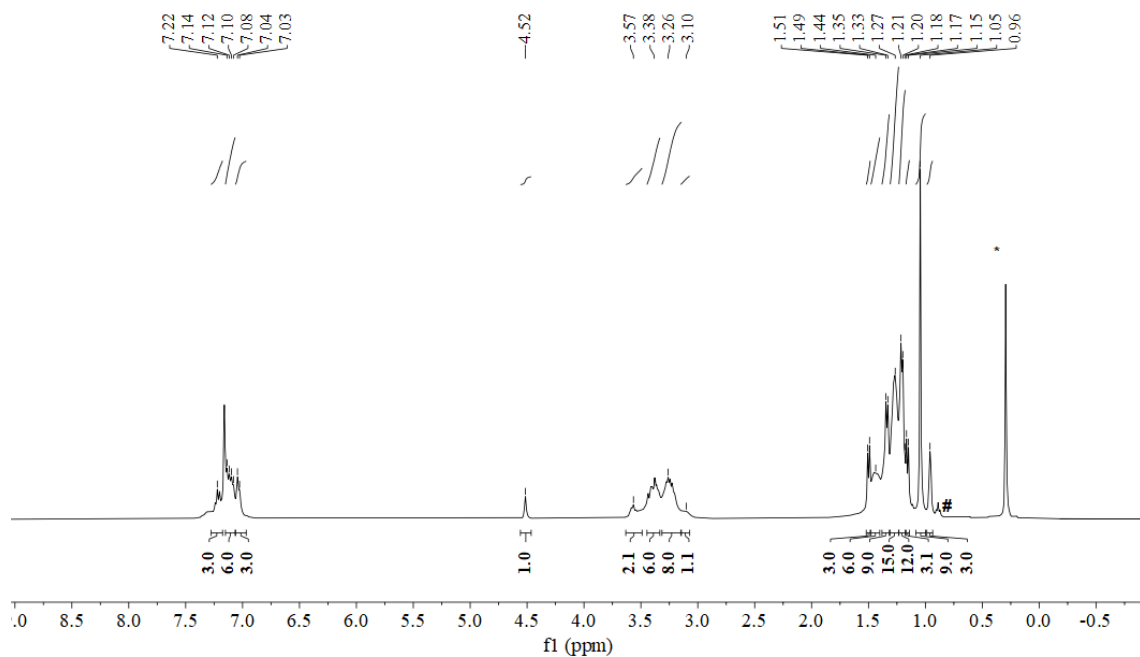

**Figure S76.**  $^1\text{H}$  NMR of **8b** in  $\text{C}_6\text{D}_6$ . #Hexane, \*silicone grease.

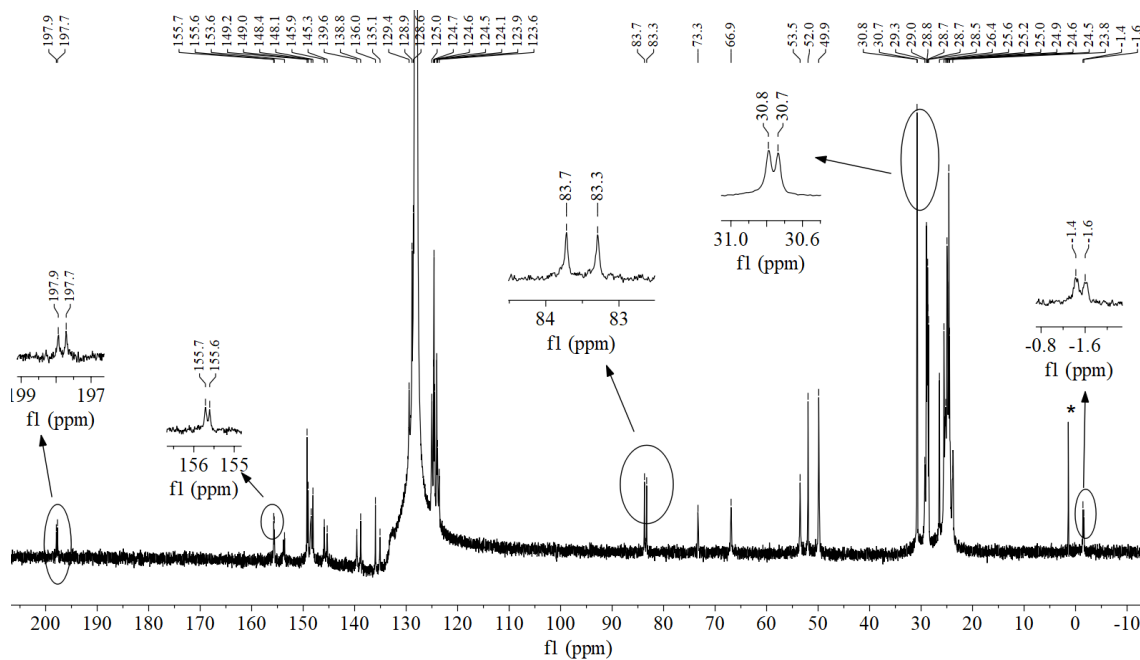

**Figure S77.**  $^{13}\text{C}\{^1\text{H}\}$  NMR of **8b** in  $\text{C}_6\text{D}_6$ . \*Silicone grease.

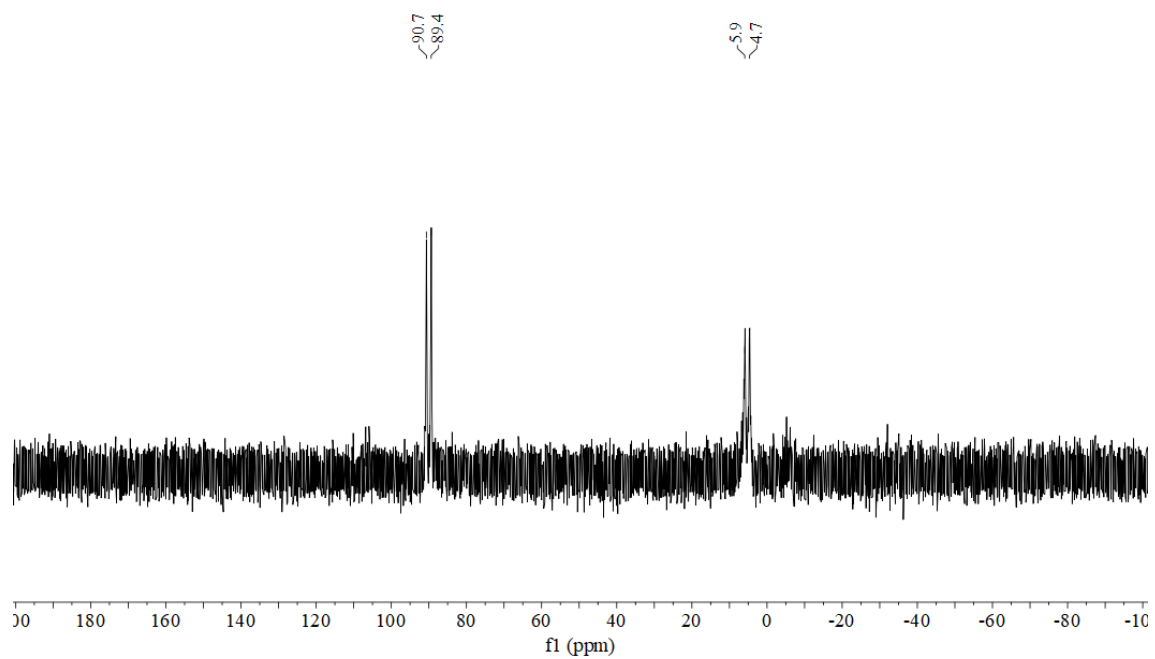

**Figure S78.**  $^{31}\text{P}\{^1\text{H}\}$  NMR of **8b** in  $\text{C}_6\text{D}_6$ .

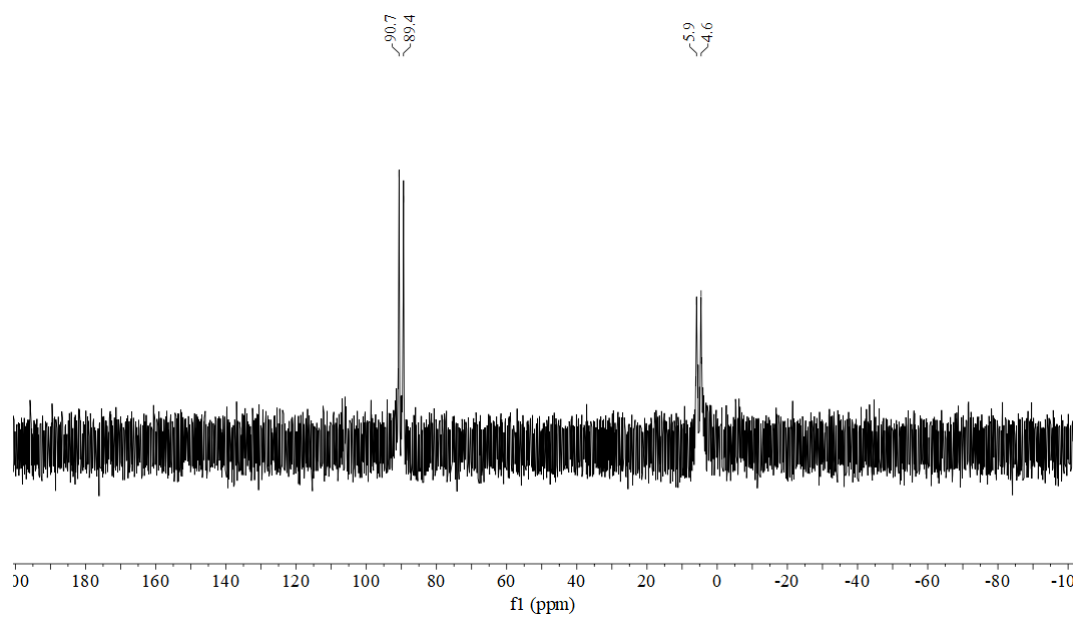

**Figure S79.**  $^{31}\text{P}\{^1\text{H}\}$  NMR of **8b** in  $\text{C}_6\text{D}_6$ .

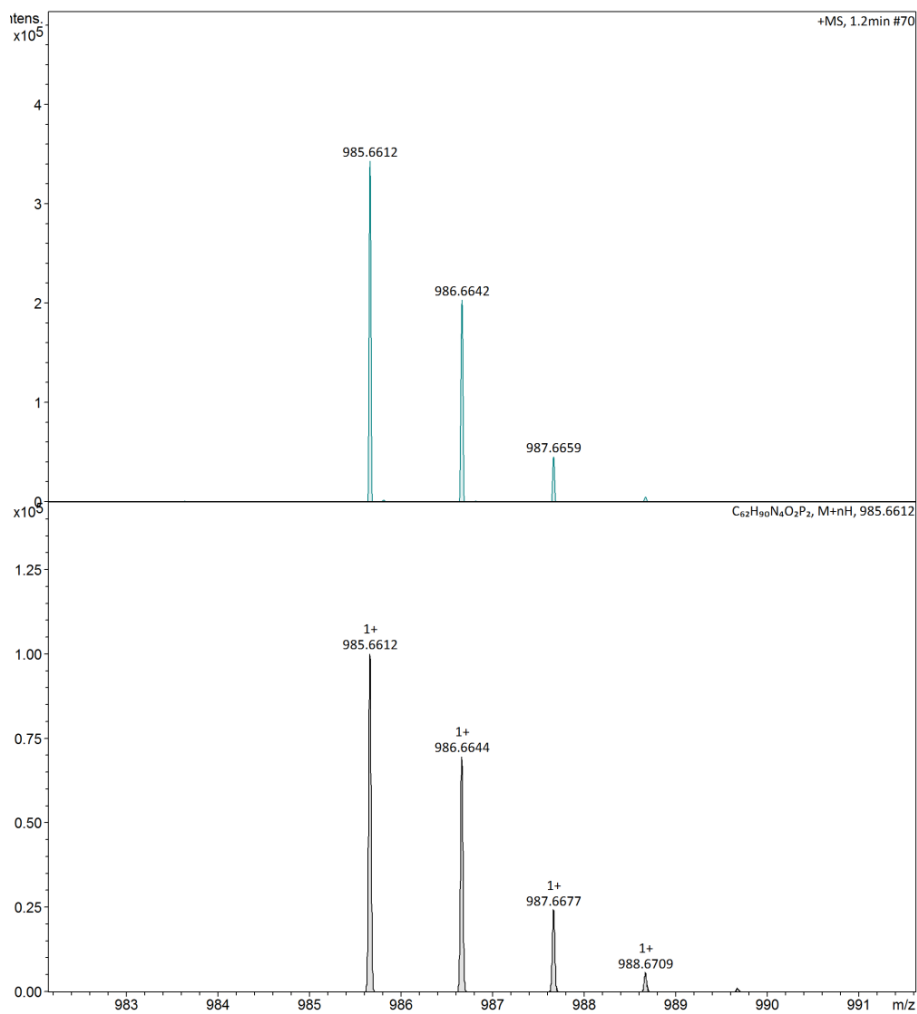

**Figure S80.** HRMS of **8b**.

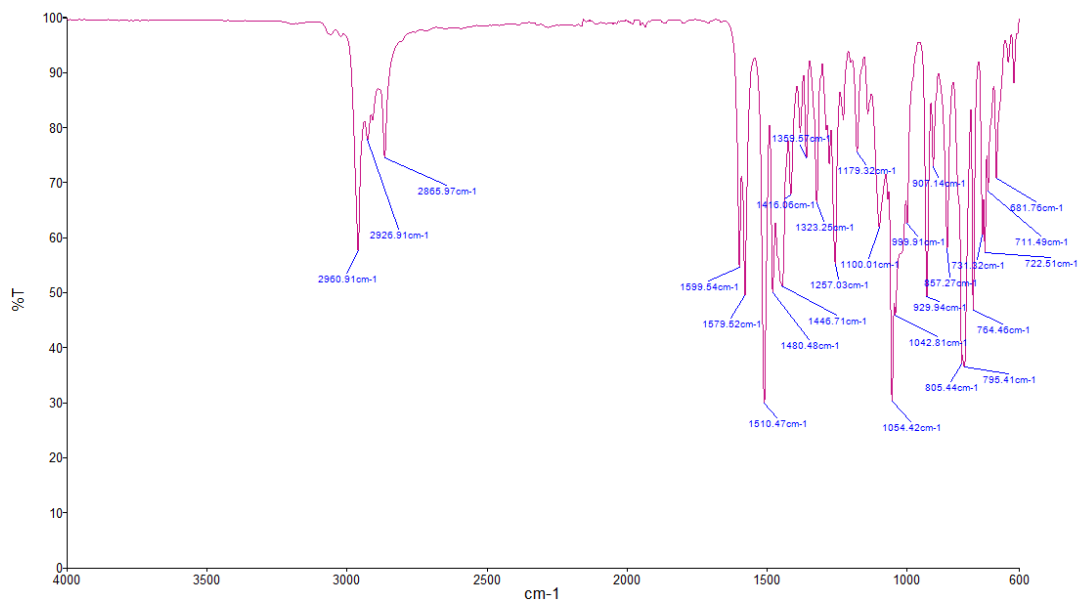

**Figure S81.** IR spectrum of **8b**.



## Synthesis of 9a:

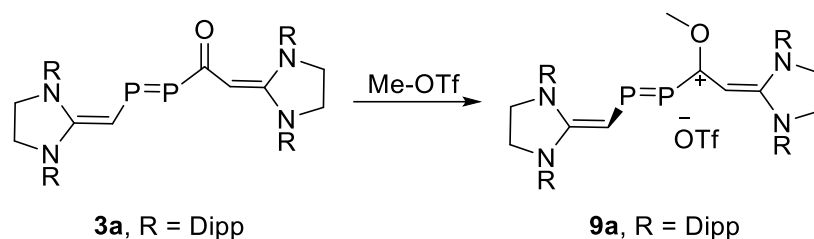

Methyl trifluoromethanesulfonate (Me-OTf) (18 mg, 0.1 mmol) in hexane (10 mL) was added to a stirred solution of **3a** (100 mg, 0.1 mmol) in hexane (30 mL) at room temperature. After stirring at room temperature for 0.5 h, the resulting precipitates were collected via filtration, then washed with hexane ( $2 \times 1$  mL) and dried *in vacuo* to afford **9a** (103 mg, yield = 99 %) as a purple powder. M. p. 115 °C (Decomposition).  $^1\text{H}$  NMR (400.1 MHz,  $\text{CD}_3\text{CN}$ ):  $\delta$  = 7.46-7.41(m, 4 H,  $\text{C}_{\text{Ar}}\text{H}$ ), 7.30 (d,  $J$  = 7.8 Hz, 4 H,  $\text{C}_{\text{Ar}}\text{H}$ ), 7.24 (d,  $J$  = 7.8 Hz, 4 H,  $\text{C}_{\text{Ar}}\text{H}$ ), 6.11 (t,  $^2J_{\text{PH}} \approx ^3J_{\text{PH}} = 14.1$  Hz, 1 H,  $\text{CHPP}$ ), 4.85 (s, 1 H,  $\text{CHCO}$ ), 4.05 (s, 4 H,  $\text{NCH}_2$ ), 3.97 (s, 4 H,  $\text{NCH}_2$ ), 3.01 (m, 4 H,  $\text{CH}(\text{CH}_3)_2$ ), 2.93 (m, 4 H,  $\text{CH}(\text{CH}_3)_2$ ), 2.82 (s, 3 H,  $\text{PCO}(\text{CH}_3)$ ), 1.27 (d,  $J$  = 6.8 Hz, 24 H,  $\text{CH}(\text{CH}_3)_2$ ), 1.08 (d,  $J$  = 6.8 Hz, 12 H,  $\text{CH}(\text{CH}_3)_2$ ), 1.01 (d,  $J$  = 6.8 Hz, 12 H,  $\text{CH}(\text{CH}_3)_2$ ).  $^{13}\text{C}\{^1\text{H}\}$  NMR (150.8 MHz,  $\text{CD}_3\text{CN}$ ):  $\delta$  = 195.0 (d,  $^1J_{\text{PC}} = 84.6$  Hz,  $^2J_{\text{PC}} = 18.5$  Hz,  $-\text{PP}(\text{O})\text{C}^+$ ), 162.7 (m,  $\text{NCN}$ ), 161.6 ( $\text{NCN}$ ), 148.3 ( $\text{C}_{\text{Ar}}$ ), 146.6 ( $\text{C}_{\text{Ar}}$ ), 134.4 ( $\text{C}_{\text{Ar}}$ ), 133.8 ( $\text{C}_{\text{Ar}}$ ), 131.4 ( $\text{C}_{\text{Ar}}$ ), 130.9 ( $\text{C}_{\text{Ar}}$ ), 126.1 ( $\text{CF}_3$ ), 126.0 ( $\text{C}_{\text{Ar}}$ ), 103.9 (t,  $^1J_{\text{PC}} \approx ^2J_{\text{PC}} = 54.3$  Hz,  $\text{CHPP}$ ), 87.9 (d,  $^2J_{\text{PC}} = 15.8$  Hz,  $\text{CHC}(\text{OCH}_3)\text{P}$ ), 59.6 (d,  $^3J_{\text{PC}} = 24.4$  Hz,  $(\text{CH}_3\text{O})\text{CP}$ ), 53.4 ( $\text{NCH}_2$ ), 52.2 ( $\text{NCH}_2$ ), 29.7, 29.6, 25.1, 24.8, 24.5, 24.4.  $^{31}\text{P}\{^1\text{H}\}$  NMR (242.9 MHz,  $\text{CD}_3\text{CN}$ ):  $\delta$  = 471.3 (d,  $^1J_{\text{PP}} = 500.6$  Hz,  $-\text{P}=\text{P}-\text{C}^+-$ ), 229.7 (d,  $^1J_{\text{PP}} = 500.6$  Hz,  $-\text{P}=\text{P}-\text{C}^+-$ ).  $^{31}\text{P}$  NMR (242.9 MHz,  $\text{CD}_3\text{CN}$ ):  $\delta$  = 471.3 (d,  $^1J_{\text{PP}} = 500.6$  Hz,  $-\text{P}=\text{P}-\text{C}^+-$ ), 229.7 (d,  $^1J_{\text{PP}} = 500.6$  Hz,  $-\text{P}=\text{P}-\text{C}^+-$ ).  $^{19}\text{F}\{^1\text{H}\}$  NMR (376 MHz,  $\text{CD}_3\text{CN}$ ):  $\delta$  = -79.3. UV/Vis (acetonitrile,  $\lambda$  (nm)  $\epsilon$  ( $\text{M}^{-1}\text{cm}^{-1}$ )): 569.0(21688). HRMS (ESI,  $m/z$ ) calc. for:  $\text{C}_{58}\text{H}_{81}\text{N}_4\text{OP}_2^+$ : 911.5880 [M]; found: 911.5881. IR (ATR,  $\text{cm}^{-1}$ ): 2963, 2929, 2870, 1435, 1263, 1030, 805, 637, 539.

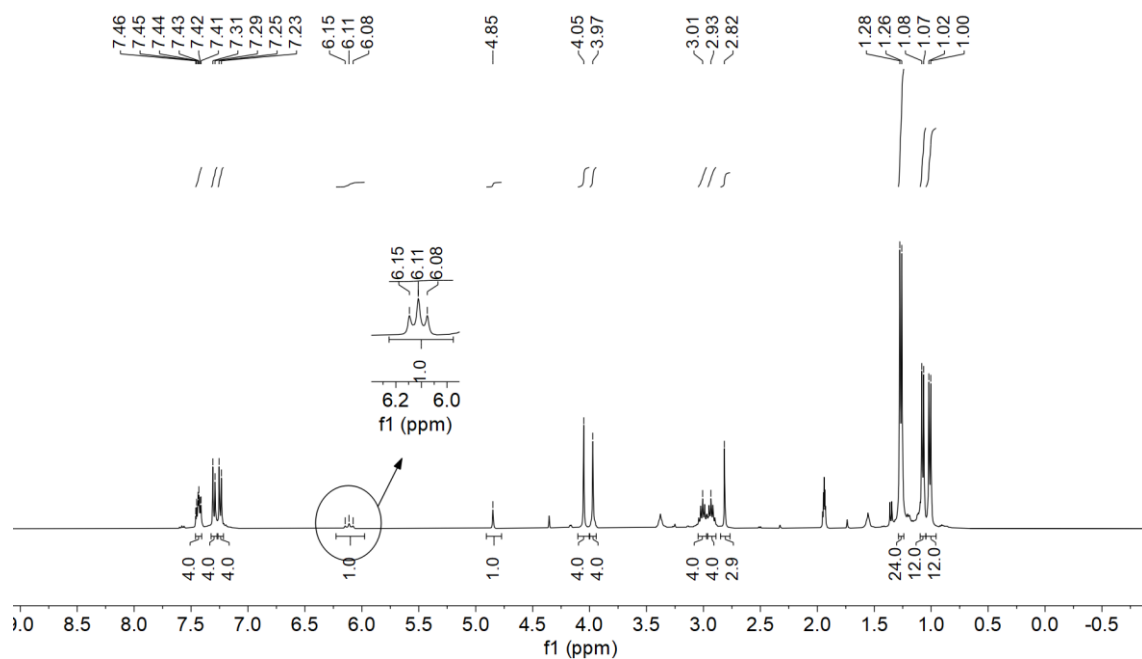

**Figure S82.**  $^1\text{H}$  NMR of **9a** in  $\text{CD}_3\text{CN}$ .

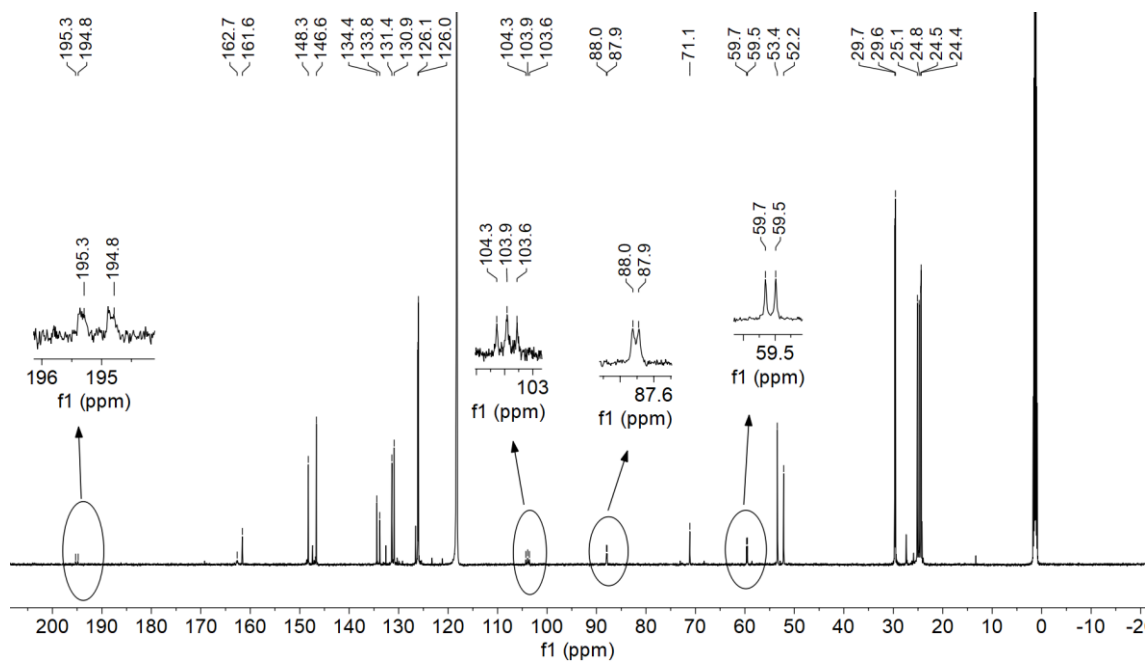

**Figure S83.**  $^{13}\text{C}\{^1\text{H}\}$  NMR of **9a** in  $\text{CD}_3\text{CN}$ .

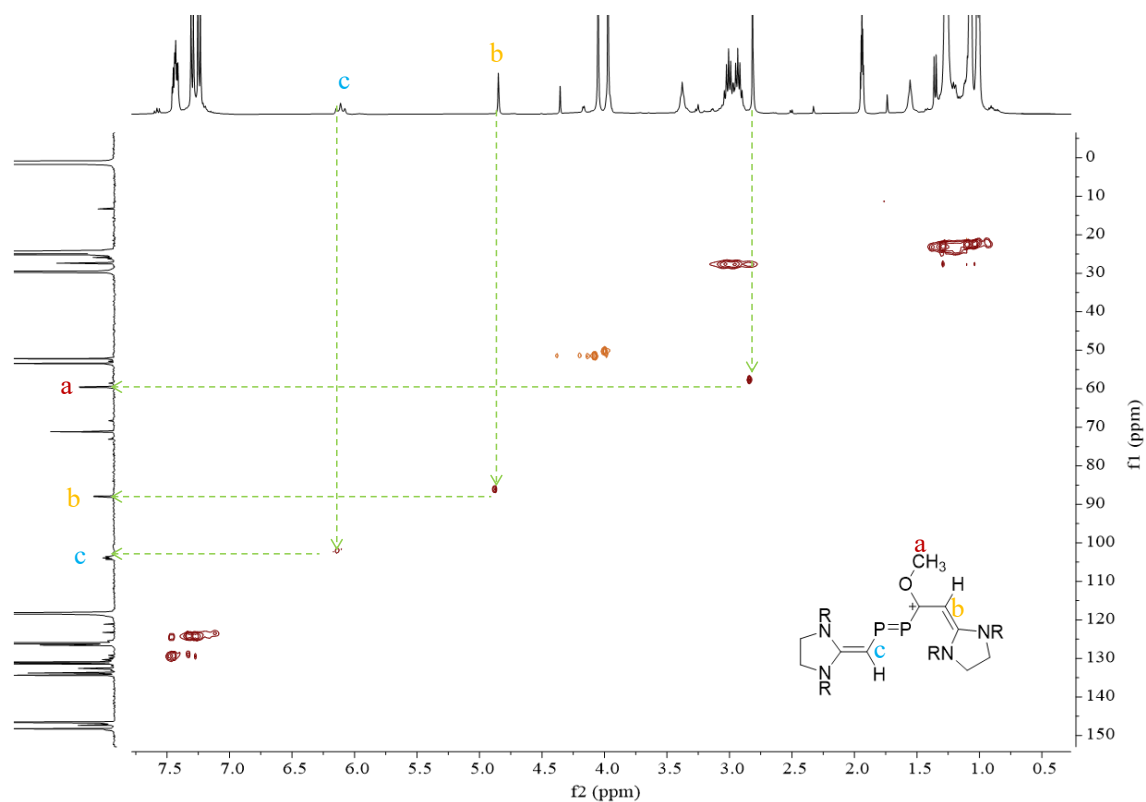

**Figure S84.**  $^1\text{H}$ - $^{13}\text{C}$  HSQC NMR of **9a** in  $\text{CD}_3\text{CN}$ .

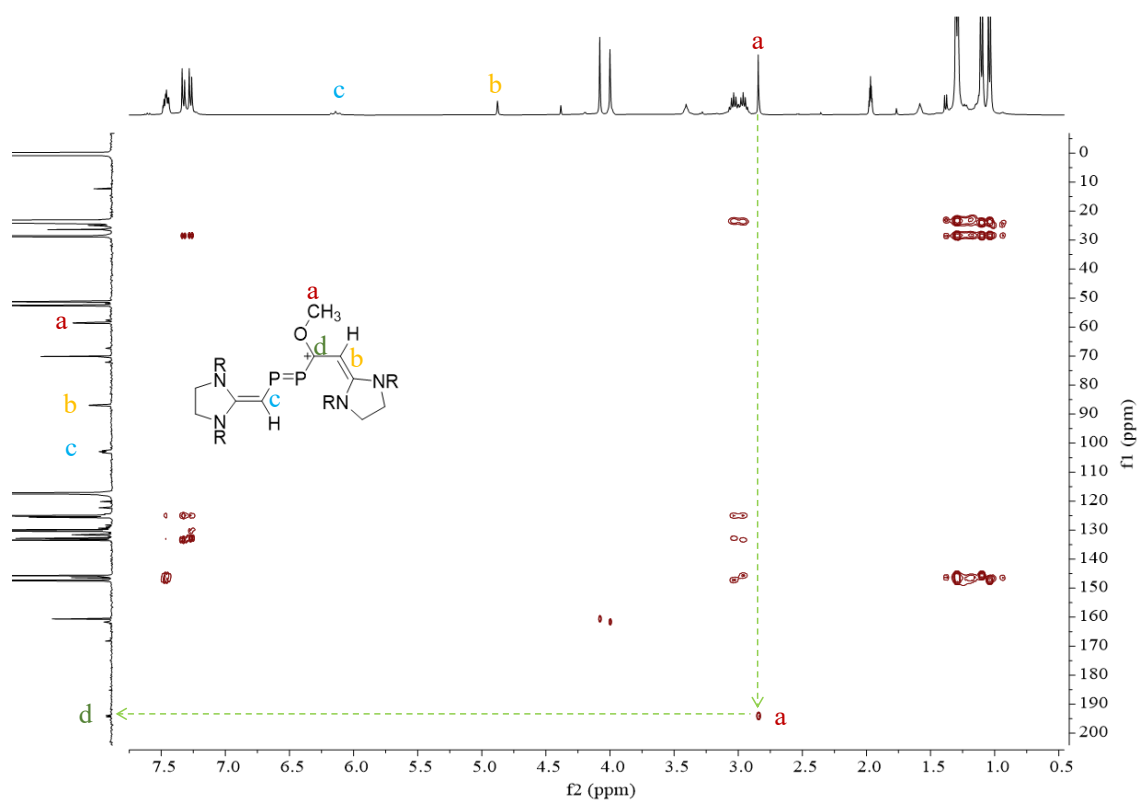

**Figure S85.**  $^1\text{H}$ - $^{13}\text{C}$  HMBC NMR of **9a** in  $\text{CD}_3\text{CN}$ .

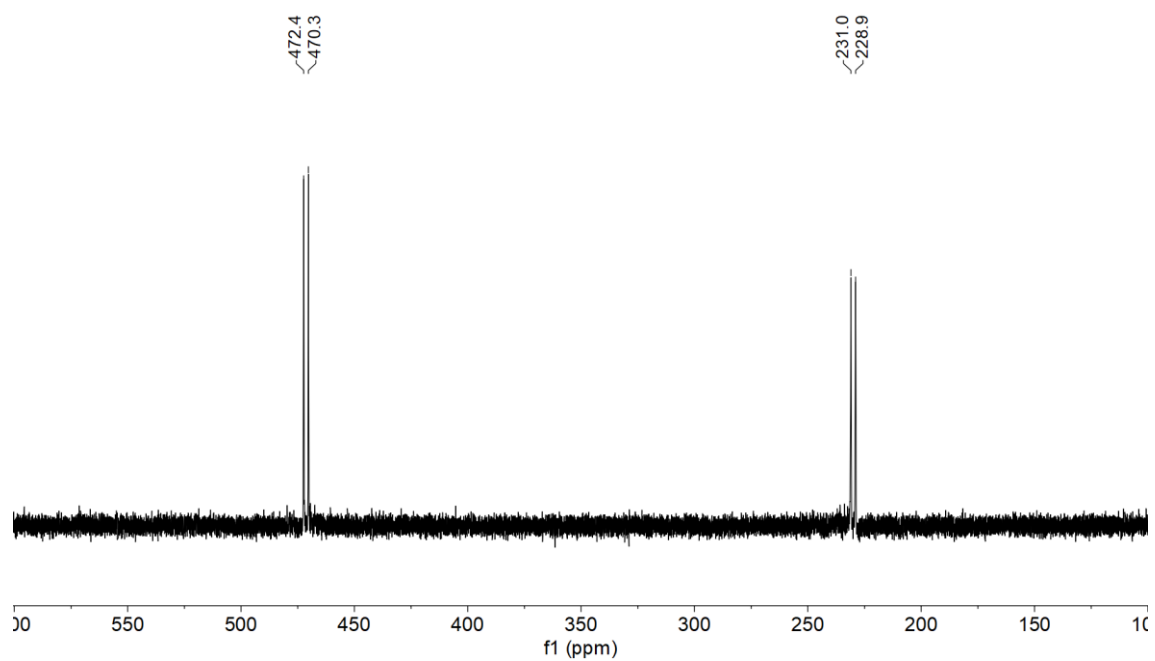

**Figure S86.**  $^{31}\text{P}\{^1\text{H}\}$  NMR of **9a** in  $\text{CD}_3\text{CN}$ .

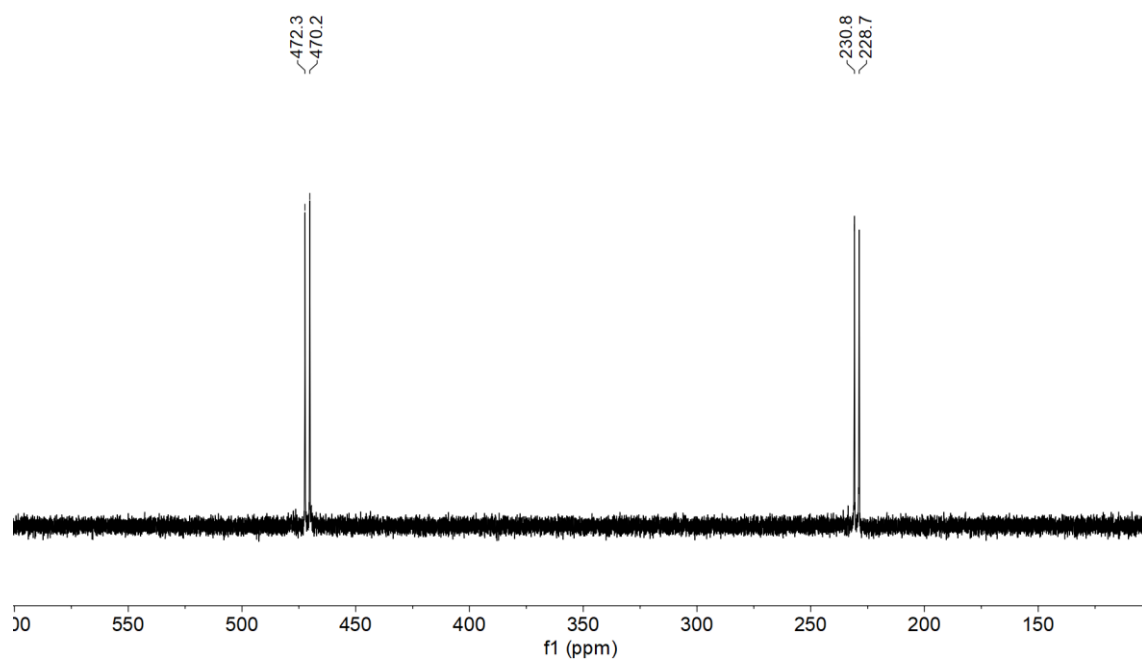

**Figure S87.**  $^{31}\text{P}$  NMR of **9a** in  $\text{CD}_3\text{CN}$ .

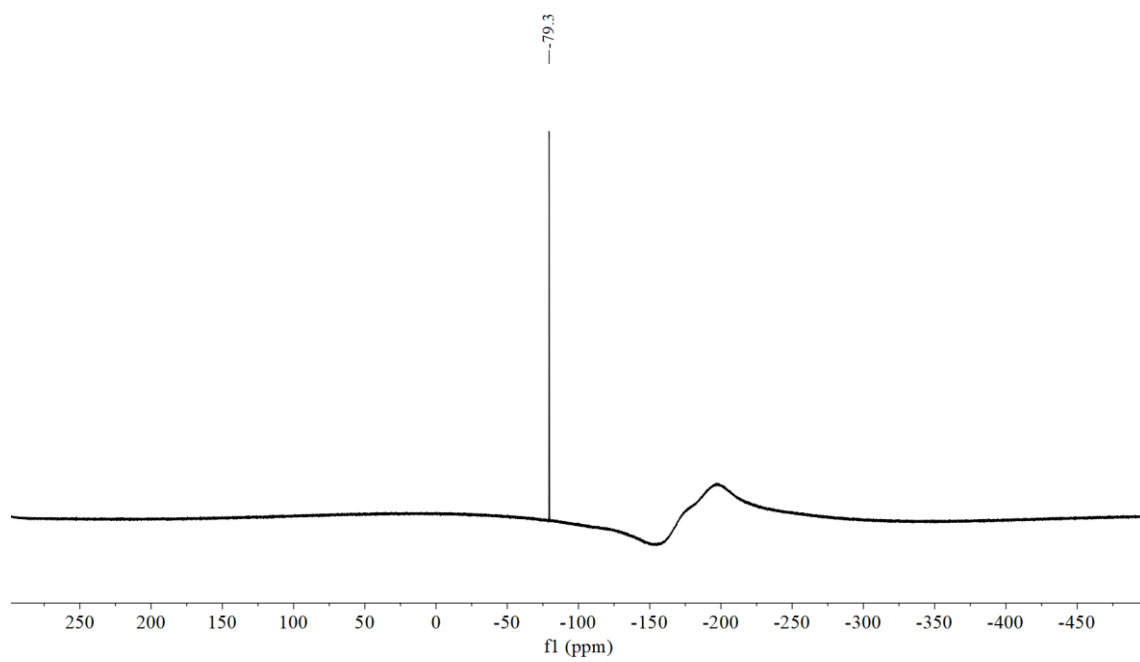

**Figure S88.**  $^{19}\text{F}\{^1\text{H}\}$  NMR of **9a** in  $\text{CD}_3\text{CN}$ .

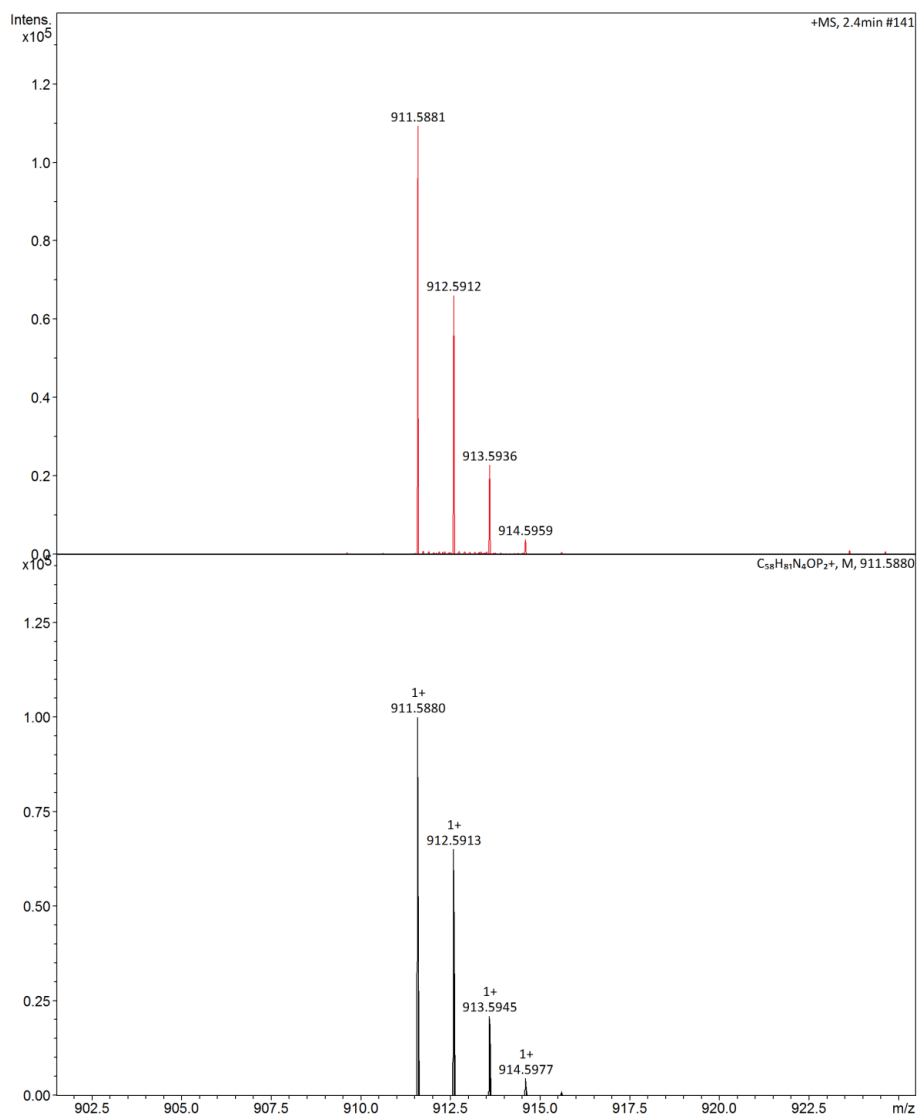

Figure S89. HRMS of 9a.

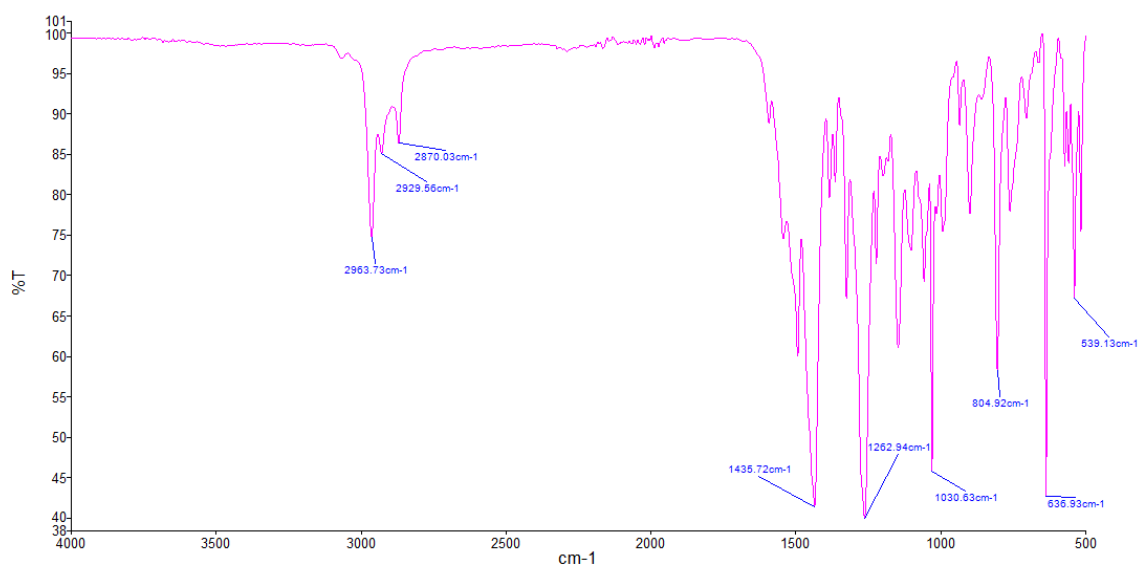

Figure S90. IR spectrum of 9a.

## Synthesis of 9b:

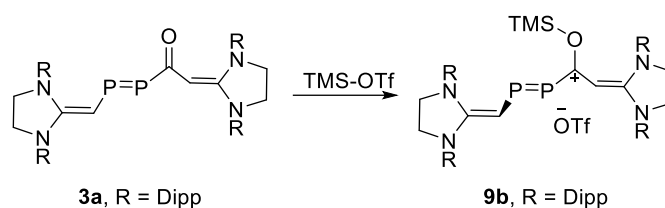

Trimethylsilyl trifluoromethanesulfonate (TMS-OTf) (24 mg, 0.1 mmol) in hexane (10 mL) was added to a stirred solution of **3a** (100 mg, 0.1 mmol) in hexane (30 mL) at room temperature. After stirring at room temperature for 0.5 h, the resulting precipitates were collected via filtration, then washed with hexane ( $2 \times 1$  mL) and dried *in vacuo* to afford **9b** (98 mg, yield = 90 %) as a purple powder.  $^1\text{H}$  NMR (600.2 MHz,  $\text{CD}_3\text{CN}$ ):  $\delta$  = 7.41 (t,  $J$  = 7.1 Hz, 2 H,  $\text{C}_{\text{Ar}}\text{H}$ ), 7.33 (t,  $J$  = 7.8 Hz, 2 H,  $\text{C}_{\text{Ar}}\text{H}$ ), 7.28 (d,  $J$  = 7.1 Hz, 4 H,  $\text{C}_{\text{Ar}}\text{H}$ ), 7.20 (d,  $J$  = 7.8 Hz, 4 H,  $\text{C}_{\text{Ar}}\text{H}$ ), 6.06 (t,  $^2J_{\text{PH}} \sim ^3J_{\text{PH}} = 11.0$  Hz, 1 H,  $\text{CH-PP}$ ), 4.70 (d,  $^3J_{\text{PH}} = 19.5$  Hz, 1 H,  $\text{CH-C(O)-P}$ ), 4.18 (s, 4 H,  $\text{NCH}_2$ ), 3.98 (s, 4 H,  $\text{NCH}_2$ ), 3.07 (m, 4 H,  $\text{CH}(\text{CH}_3)_2$ ), 2.89 (m, 4 H,  $\text{CH}(\text{CH}_3)_2$ ), 1.28 (d,  $J$  = 7.0 Hz, 12 H,  $\text{CH}(\text{CH}_3)_2$ ), 1.20 (d,  $J$  = 6.8 Hz, 12 H,  $\text{CH}(\text{CH}_3)_2$ ), 1.11~1.09 (m, 24 H,  $\text{CH}(\text{CH}_3)_2$ ), -0.34 (s, 9 H,  $\text{Si}(\text{CH}_3)_3$ ).  $^{13}\text{C}\{^1\text{H}\}$  NMR (150.8 MHz,  $\text{CD}_3\text{CN}$ ):  $\delta$  = 188.1 (m,  $^+C\text{-O-}$ ), 167.7 (NCN), 163.1 (NCN), 148.5 ( $\text{C}_{\text{Ar}}$ ), 147.3 ( $\text{C}_{\text{Ar}}$ ), 134.5 ( $\text{C}_{\text{Ar}}$ ), 133.2 ( $\text{C}_{\text{Ar}}$ ), 131.4 ( $\text{C}_{\text{Ar}}$ ), 131.1 ( $\text{C}_{\text{Ar}}$ ), 126.1 ( $\text{CF}_3$ ), 126.0 ( $\text{C}_{\text{Ar}}$ ), 101.0 (t,  $^1J_{\text{PC}} = ^2J_{\text{PC}} = 51.7$  Hz, =CHPP), 98.8 (d,  $^2J_{\text{PC}} = 22.2$  Hz, =CHC(OTMS)P), 53.3 ( $\text{NCH}_2$ ), 52.2 ( $\text{NCH}_2$ ), 29.7, 29.6, 26.1, 24.9, 24.5, 23.9, 0.2 ( $\text{Si}(\text{CH}_3)_3$ ).  $^{31}\text{P}\{^1\text{H}\}$  NMR (242.9 MHz,  $\text{CD}_3\text{CN}$ ):  $\delta$  = 477.5 (d, 493.4 Hz, CHPP), 252.0 (d, 493.4 Hz, CHPP).  $^{31}\text{P}$  NMR (242.9 MHz,  $\text{CD}_3\text{CN}$ ):  $\delta$  = 477.5 (d, 493.4 Hz, CHPP), 252.0 (d, 493.4 Hz, CHPP).  $^{19}\text{F}\{^1\text{H}\}$  NMR (565 MHz,  $\text{CD}_3\text{CN}$ ):  $\delta$  = -79.3. UV/Vis (acetonitrile,  $\lambda$  (nm)  $\epsilon$  ( $\text{M}^{-1}\text{cm}^{-1}$ )): 426.5 (11963), 555.0 (21071). HRMS (ESI,  $m/z$ ) calc. for:  $\text{C}_{60}\text{H}_{87}\text{N}_4\text{SiOP}_2^+$ : 969.6119 [M]; found: 969.6115. IR (ATR,  $\text{cm}^{-1}$ ): 2962, 2928, 2869, 1508, 1499, 1459, 1273, 1148, 1031, 804, 637.

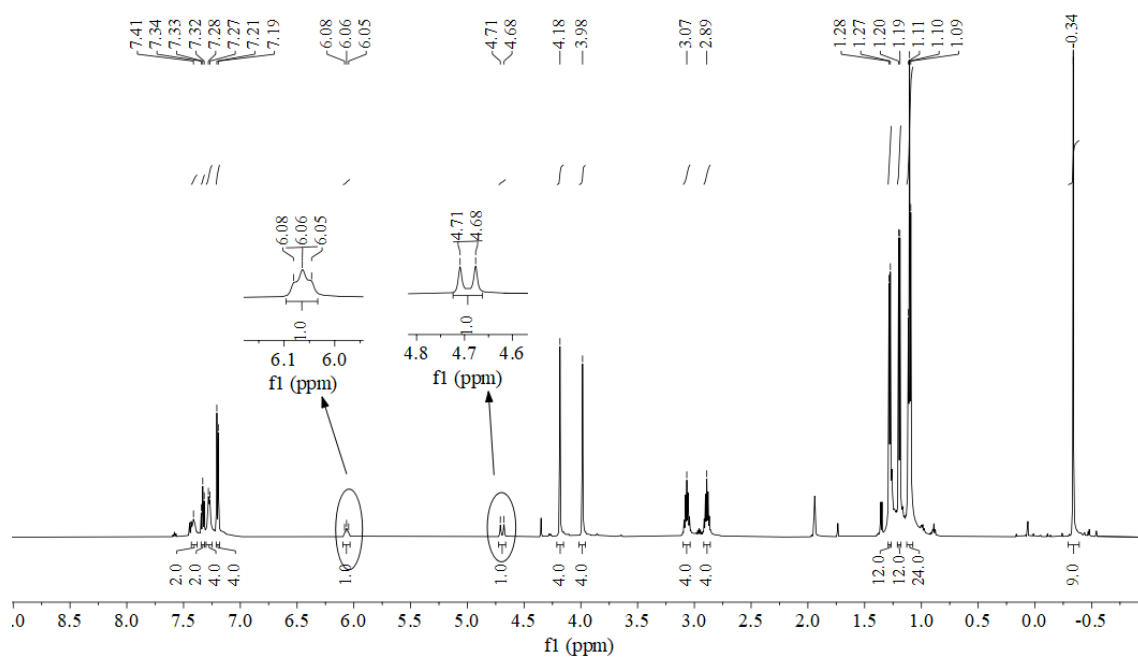

**Figure S91.**  $^1\text{H}$  NMR of **9b** in  $\text{CD}_3\text{CN}$ .

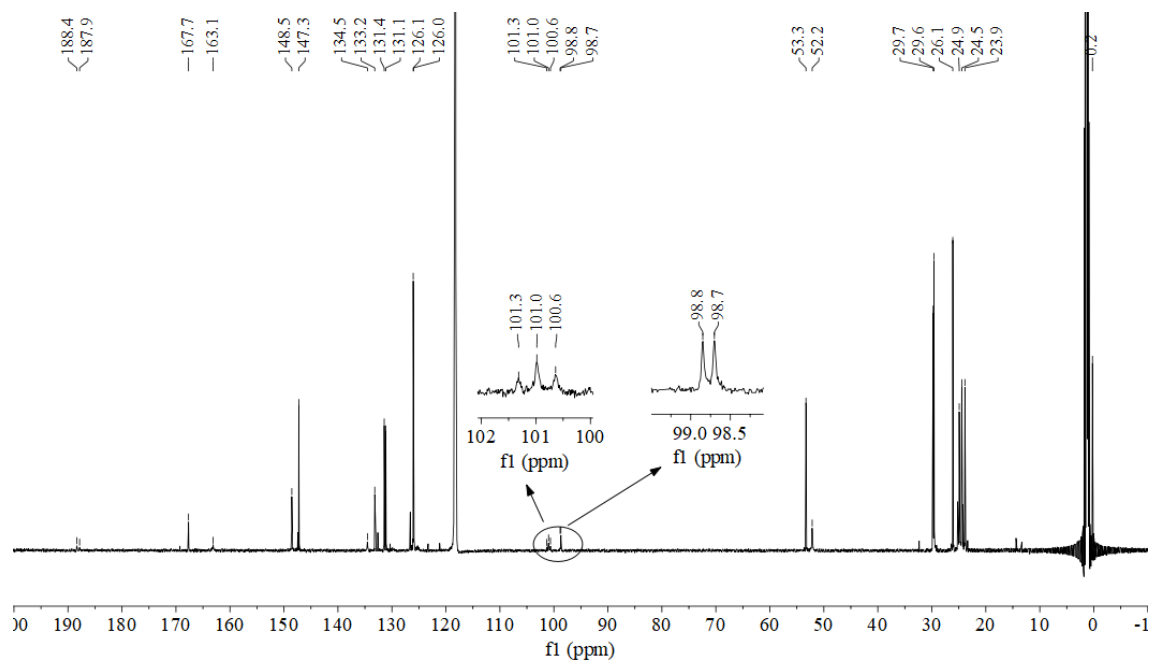

**Figure S92.**  $^{13}\text{C}\{^1\text{H}\}$  NMR of **9b** in  $\text{CD}_3\text{CN}$ .



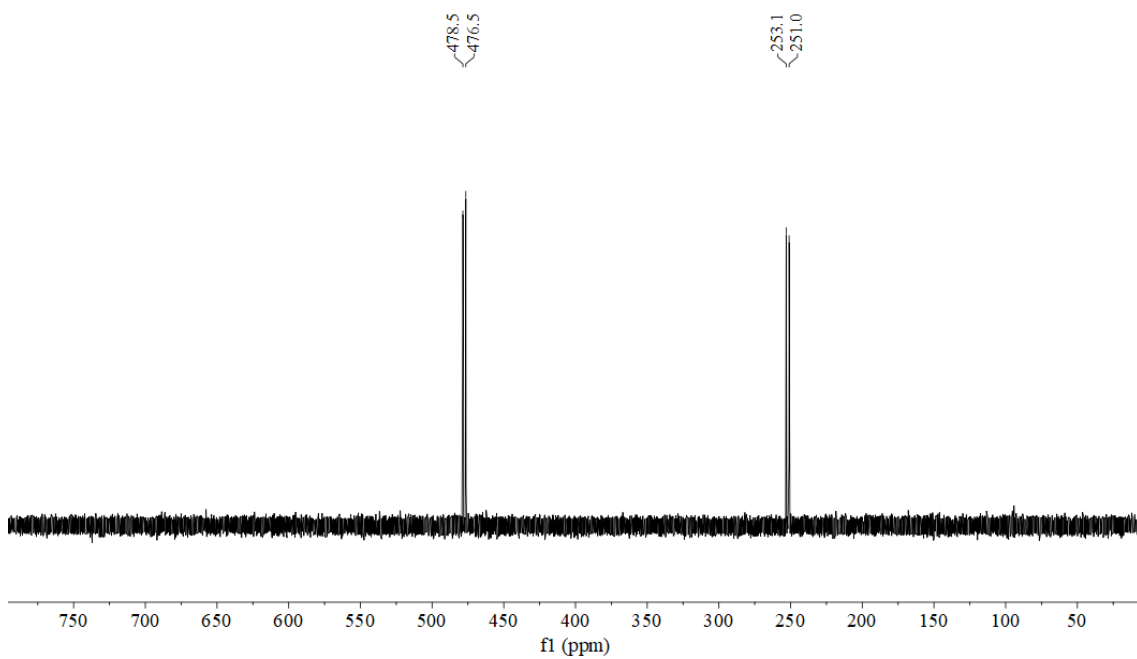

*Figure S93.* <sup>35</sup>P{<sup>1</sup>H} NMR of **9b** in CD<sub>3</sub>CN.

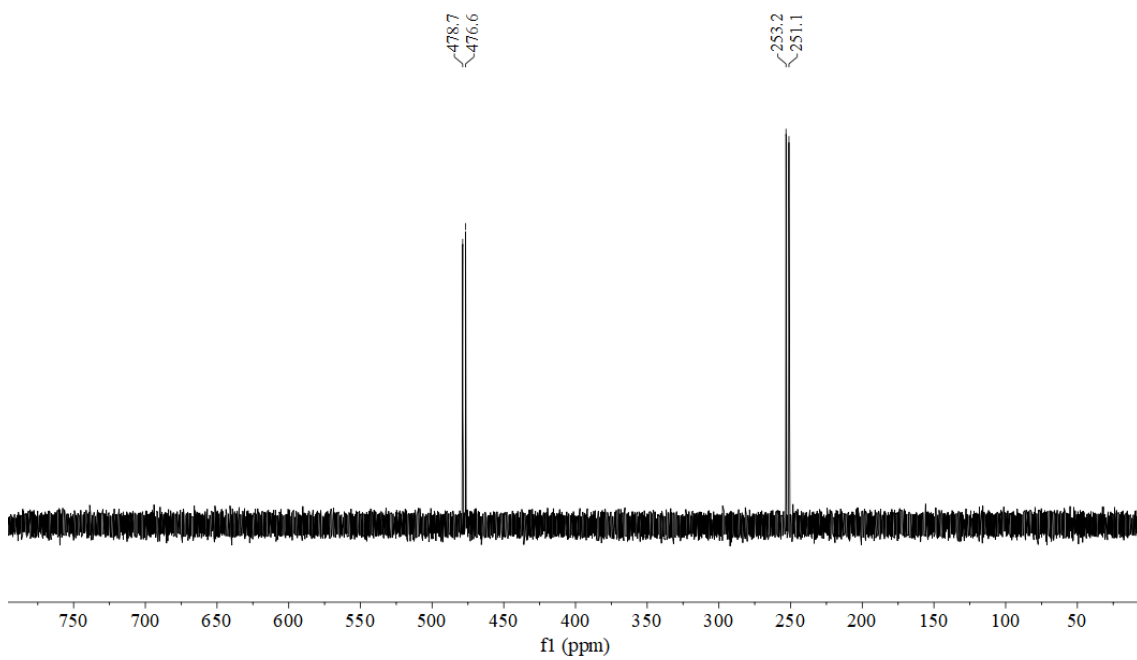

*Figure S94.* <sup>35</sup>P{<sup>1</sup>H} NMR of **9b** in CD<sub>3</sub>CN.

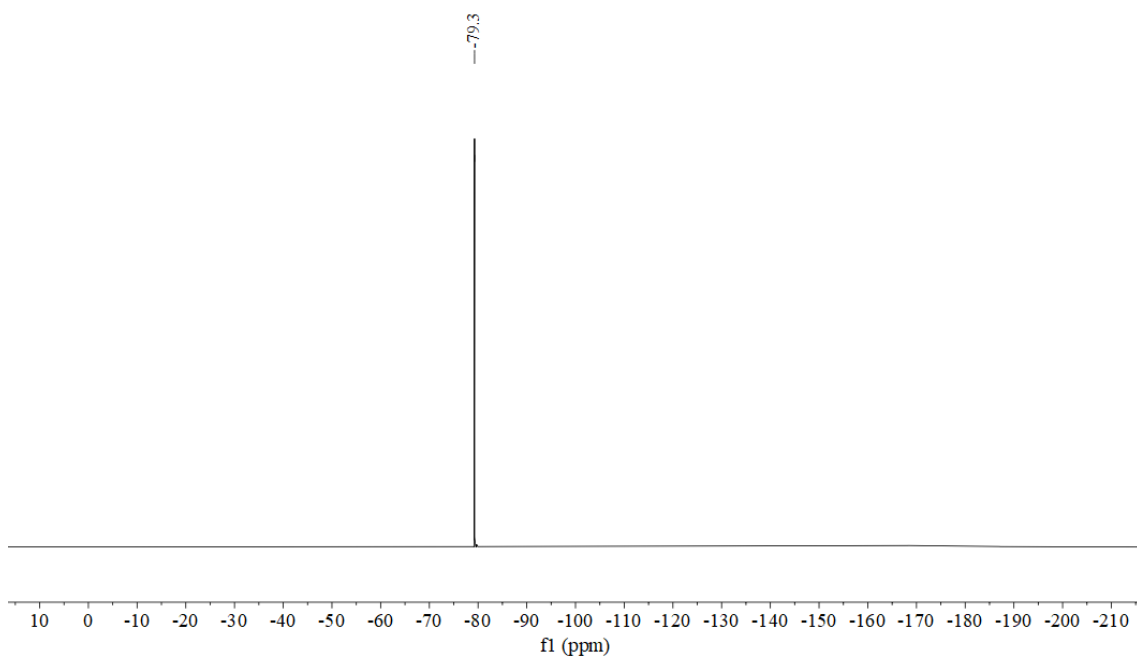

**Figure S95.**  $^{19}\text{F}\{^1\text{H}\}$  NMR of **9b** in  $\text{CD}_3\text{CN}$ .

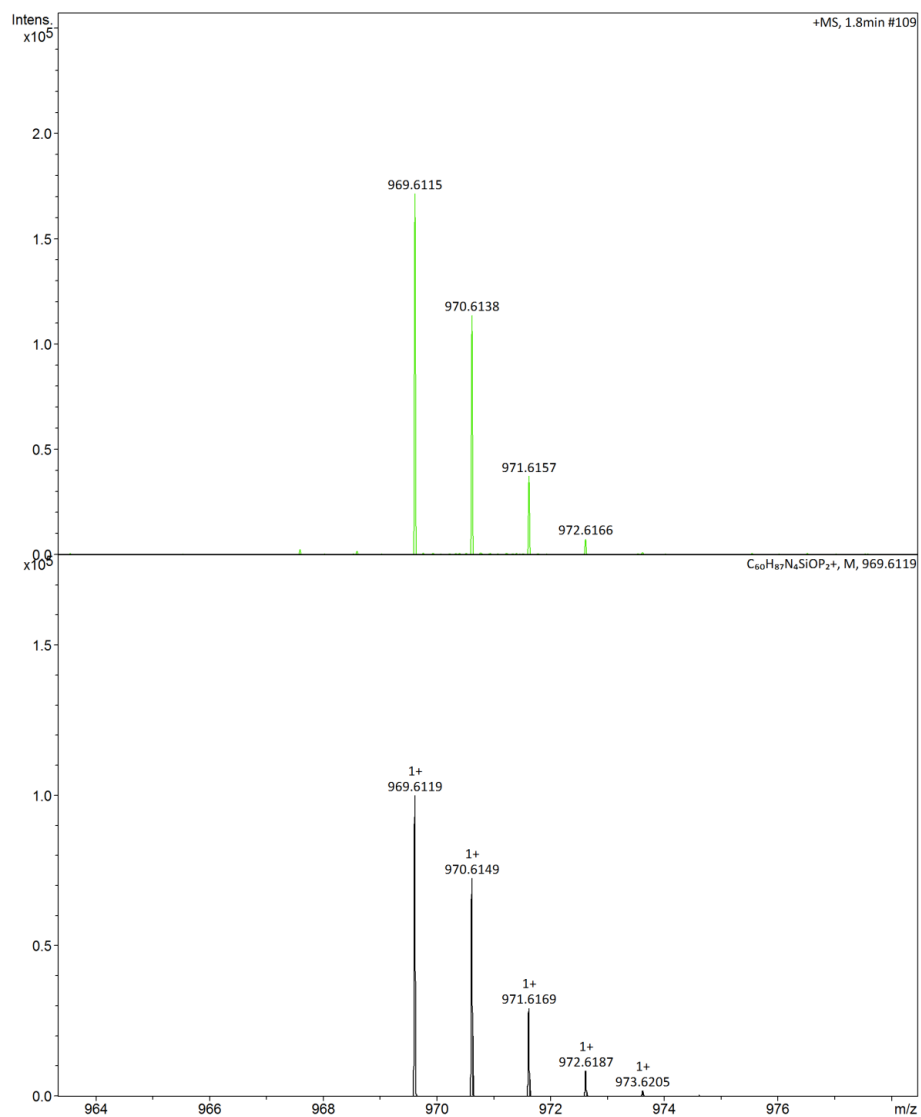

**Figure S96.** HRMS of **9b**.

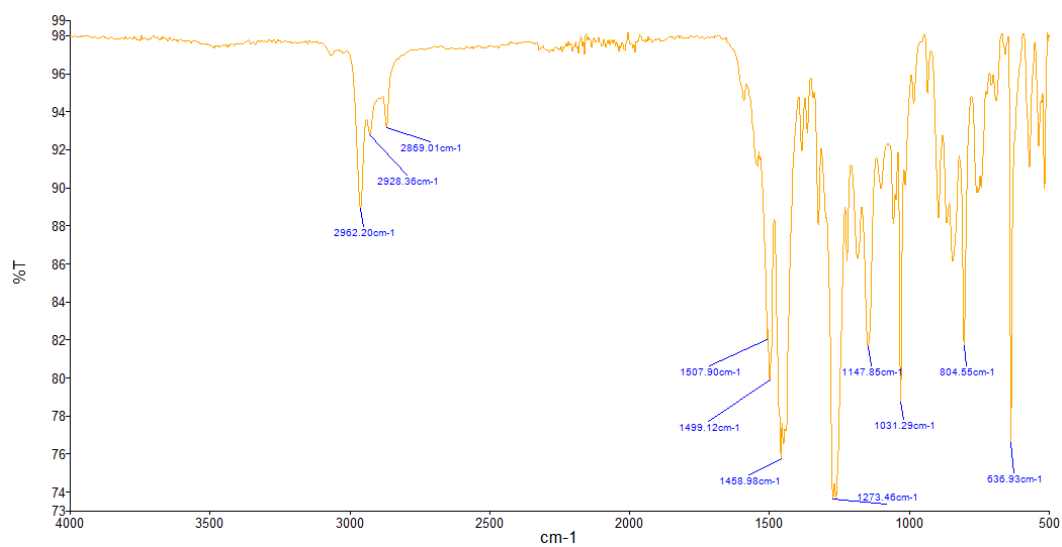

**Figure S97.** IR spectrum of **9b**.

## Synthesis of S2:

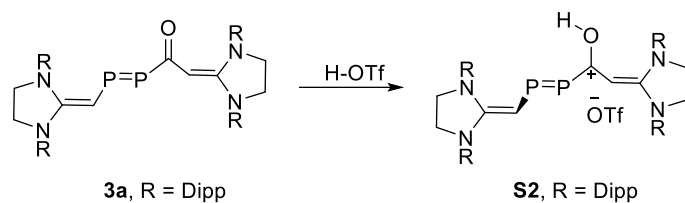

Trifluoromethanesulfonic acid (H-OTf) (3 mg, 0.02 mmol) in acetonitrile (0.1 mL) was added slowly to a stirred solution of **3a** (18 mg, 0.02 mmol) in tetrahydrofuran (1 mL) at room temperature. The reaction mixture was monitored with NMR spectroscopy revealing that **S2** was too unstable to be isolated.  $^{31}\text{P}\{^1\text{H}\}$  NMR (161.9 MHz):  $\delta = 509.2$  (d,  $^1J_{\text{PP}} = 503.6$  Hz), 267.9 (d,  $^1J_{\text{PP}} = 503.6$  Hz).  $^{31}\text{P}$  NMR (161.9 MHz):  $\delta = 509.2$  (d,  $^1J_{\text{PP}} = 503.6$  Hz), 267.9 (d,  $^1J_{\text{PP}} = 503.6$  Hz).

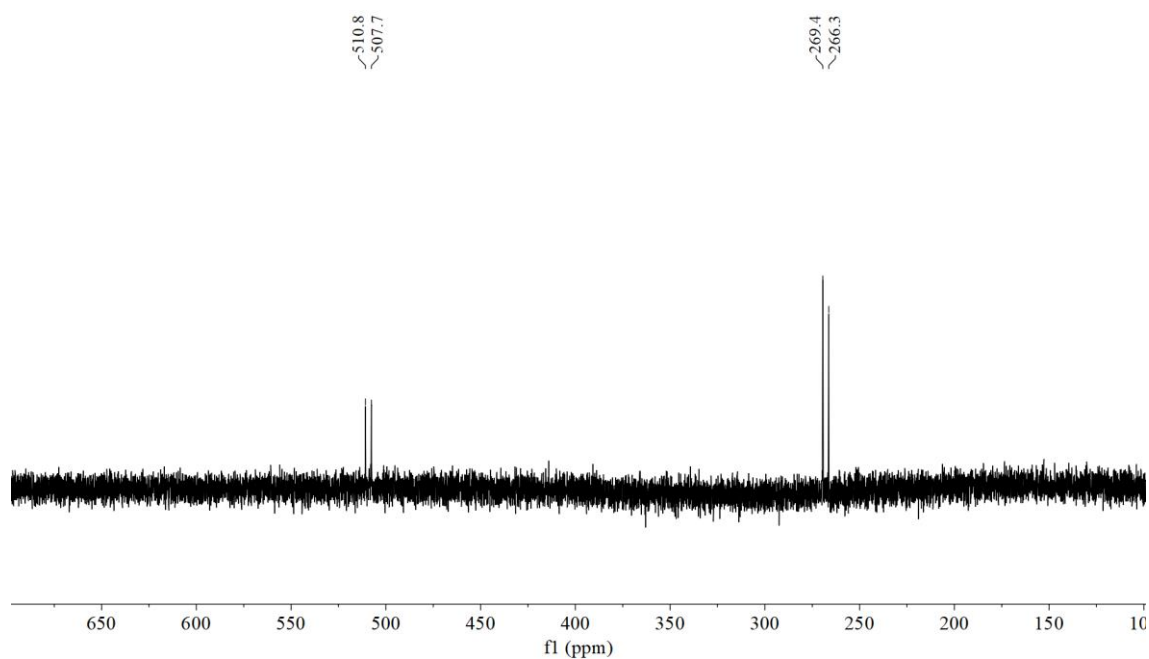

**Figure S98.**  $^{31}\text{P}\{^1\text{H}\}$  NMR spectrum of the reaction mixture.

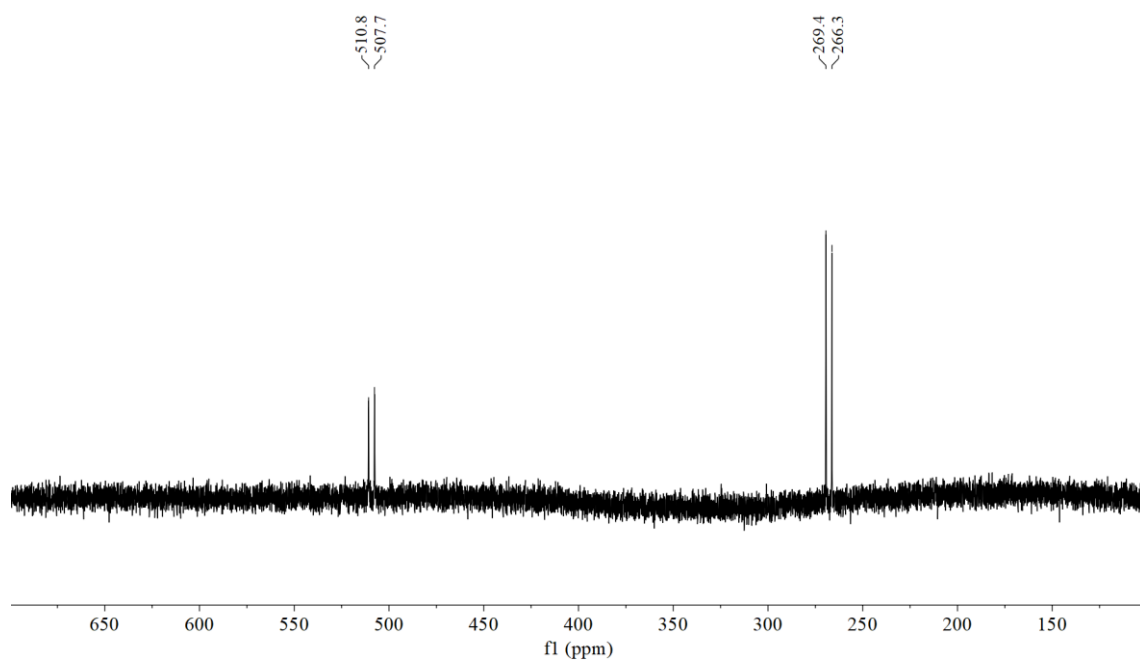

**Figure S99.**  $^{31}\text{P}$  NMR spectrum of the reaction mixture.

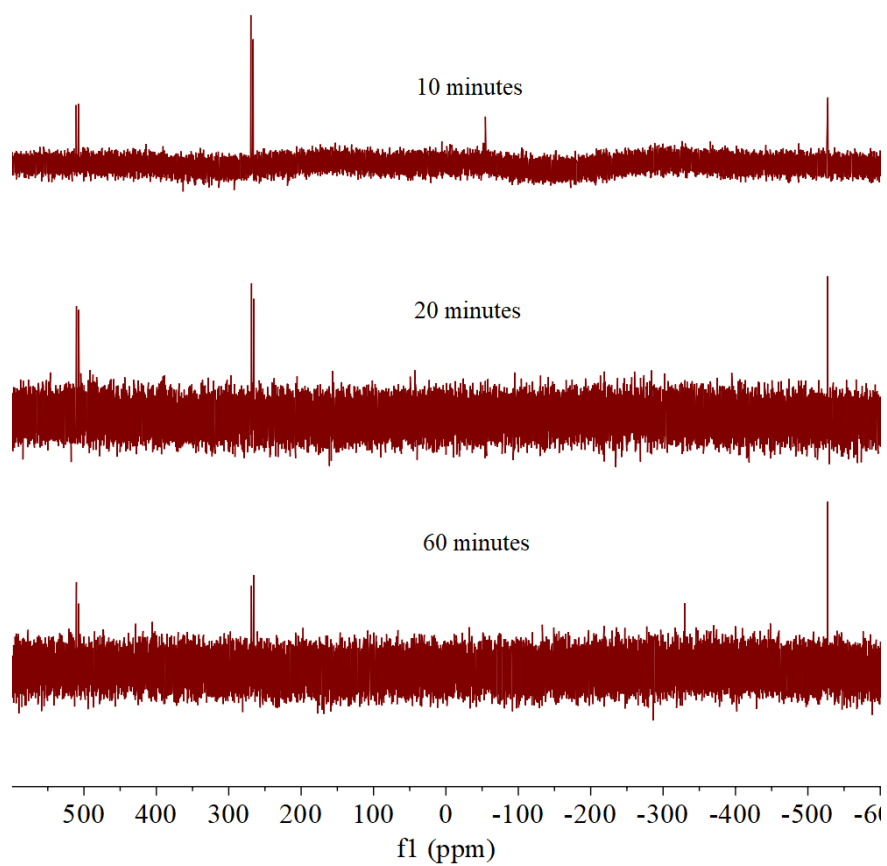

**Figure S100**  $^{31}\text{P}\{^1\text{H}\}$  NMR spectra the reaction mixture within one hour.

## Synthesis of 10:

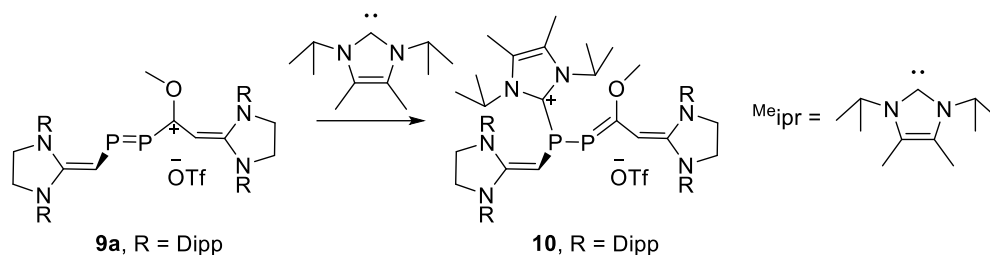

4,5-Dimethyl-1,3-diisopropylimidazol-2-ylidene ( $\text{Meipr}$ , 16 mg, 0.1 mmol) in tetrahydrofuran (4 mL) was added to a stirred solution of **9a** (100 mg, 0.1 mmol) in tetrahydrofuran (20 mL) at room temperature. After stirring at room temperature for 0.5 h, the solvent was removed *in vacuo*, the residue was dispersed in hexane (6 mL). The resulting precipitates were collected via filtration, and then washed with hexane ( $2 \times 1$  mL) and dried *in vacuo* to afford **10** (102 mg, yield = 88 %) as a dark red powder. M. p. 102 °C (decompose).  $^1\text{H}$  NMR (600.2 MHz,  $\text{CD}_2\text{Cl}_2$ ):  $\delta$  = 7.36 (t,  $J$  = 7.7 Hz, 2 H,  $\text{C}_{\text{Ar}}\text{H}$ ), 7.30 (t,  $J$  = 7.7 Hz, 1 H,  $\text{C}_{\text{Ar}}\text{H}$ ), 7.27 – 7.23 (m, 2 H,  $\text{C}_{\text{Ar}}\text{H}$ ), 7.21 (d,  $J$  = 8.0 Hz, 3 H,  $\text{C}_{\text{Ar}}\text{H}$ ), 7.13 (m, 2 H,  $\text{C}_{\text{Ar}}\text{H}$ ), 7.08 (d,  $J$  = 7.5 Hz, 1 H,  $\text{C}_{\text{Ar}}\text{H}$ ), 7.02 (d,  $J$  = 7.6 Hz, 1 H,  $\text{C}_{\text{Ar}}\text{H}$ ), 5.15 (br., 1 H, =C( $\text{CH}_3$ )), 4.98 (br., 1 H, =C( $\text{CH}_3$ )), 4.51 (m, 1 H,  $\text{CH}(\text{CH}_3)_2$ ), 4.40 (d,  $^1J_{\text{PC}}$  = 7.4 Hz, 1 H, =CHPP), 3.99 (m, 1 H,  $\text{CH}(\text{CH}_3)_2$  or/and  $\text{NCH}_2$ ), 3.88 (m, 3 H,  $\text{CH}(\text{CH}_3)_2$  or/and  $\text{NCH}_2$ ), 3.75 (m, 2 H,  $\text{CH}(\text{CH}_3)_2$  or/and  $\text{NCH}_2$ ), 3.60 (m, 1 H,  $\text{CH}(\text{CH}_3)_2$  or/and  $\text{NCH}_2$ ), 3.55 (m, 1 H,  $\text{CH}(\text{CH}_3)_2$  or/and  $\text{NCH}_2$ ), 3.36 (m, 1 H,  $\text{CH}(\text{CH}_3)_2$  or/and  $\text{NCH}_2$ ), 3.20 (m, 1 H,  $\text{CH}(\text{CH}_3)_2$  or/and  $\text{NCH}_2$ ), 3.11 (m, 3 H,  $\text{CH}(\text{CH}_3)_2$  or/and  $\text{NCH}_2$ ), 2.88 (m, 3 H,  $\text{CH}(\text{CH}_3)_2$  or/and  $\text{NCH}_2$ ), 2.54 (d,  $^2J_{\text{PC}}$  = 4.5 Hz, 1 H, =CHC(OCH<sub>3</sub>)PP), 2.42 (s, 2 H, =C( $\text{CH}_3$ )), 2.30 (s, 2 H, =C( $\text{CH}_3$ )), 2.14 (br., 4 H, -PCO( $\text{CH}_3$ ) &  $\text{CH}(\text{CH}_3)_2$ ), 1.63 (d,  $J$  = 6.8 Hz, 3 H,  $\text{CH}(\text{CH}_3)_2$ ), 1.35 – 1.18 (m, 48 H,  $\text{CH}(\text{CH}_3)_2$ ), 1.01 (m, 6 H,  $\text{CH}(\text{CH}_3)_2$ ), 0.72 (d,  $J$  = 6.9 Hz, 3 H,  $\text{CH}(\text{CH}_3)_2$ ).  $^{13}\text{C}\{^1\text{H}\}$  NMR (150.8 MHz,  $\text{CD}_2\text{Cl}_2$ ):  $\delta$  = 205.8 (dd,  $^1J_{\text{PC}}$  = 97.5,  $^2J_{\text{PC}}$  = 9.5 Hz, C(OCH<sub>3</sub>)), 160.5 (d,  $^2J_{\text{PC}}$  = 39.3 Hz, NCN), 156.2 (d,  $^3J_{\text{PC}}$  = 18.0 Hz, NCN), 152.8 (d,  $^1J_{\text{PP}}$  = 80.8 Hz, NCN), 149.5 ( $\text{C}_{\text{Ar}}$ ), 149.2 ( $\text{C}_{\text{Ar}}$ ), 148.0 ( $\text{C}_{\text{Ar}}$ ), 147.9 ( $\text{C}_{\text{Ar}}$ ), 147.0 ( $\text{C}_{\text{Ar}}$ ), 146.8 ( $\text{C}_{\text{Ar}}$ ), 146.2 ( $\text{C}_{\text{Ar}}$ ), 138.6 ( $\text{C}_{\text{Ar}}$ ), 134.9 ( $\text{C}_{\text{Ar}}$ ), 128.9 ( $\text{C}_{\text{Ar}}$ ), 128.6 ( $\text{C}_{\text{Ar}}$ ), 128.1 ( $\text{C}_{\text{Ar}}$ ), 126.3 ( $\text{CF}_3$ ), 124.9 ( $\text{C}_{\text{Ar}}$ ), 124.8 ( $\text{C}_{\text{Ar}}$ ), 124.6 ( $\text{C}_{\text{Ar}}$ ), 124.5 ( $\text{C}_{\text{Ar}}$ ), 124.0 ( $\text{C}_{\text{Ar}}$ ), 123.4 ( $\text{C}_{\text{Ar}}$ ), 81.4 (dd,  $^1J_{\text{PC}}$  = 52.2,  $^2J_{\text{PC}}$  = 9.3 Hz, =CHPP), 60.6 (d,  $^1J_{\text{PC}}$  = 24.3 Hz, =CHC(OCH<sub>3</sub>)PP), 52.2 ( $\text{NCH}_2$ ), 51.6 ( $\text{NCH}_2$ ), 51.0 ( $\text{NCH}_2$ ), 50.7 (d,  $^3J_{\text{PC}}$  = 5.6 Hz, NC( $\text{CH}_3$ )), 50.5 (d,  $^3J_{\text{PC}}$  = 5.6 Hz, NC( $\text{CH}_3$ )),



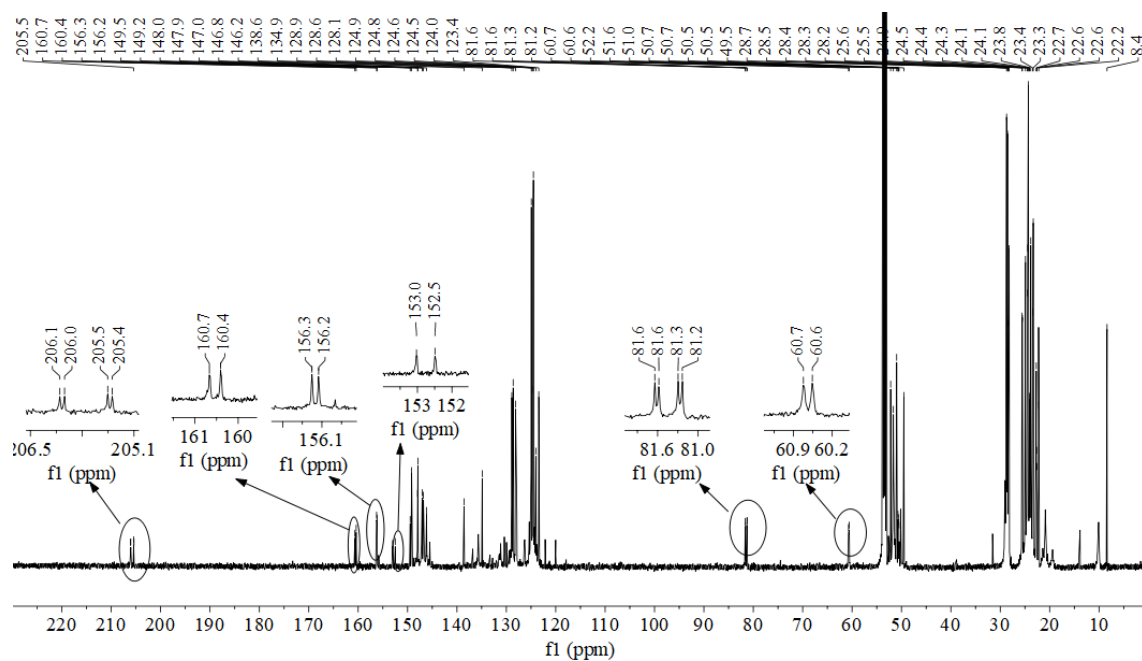

**Figure S102.**  $^{13}\text{C}\{^1\text{H}\}$  NMR of **10** in  $\text{CD}_2\text{Cl}_2$ .

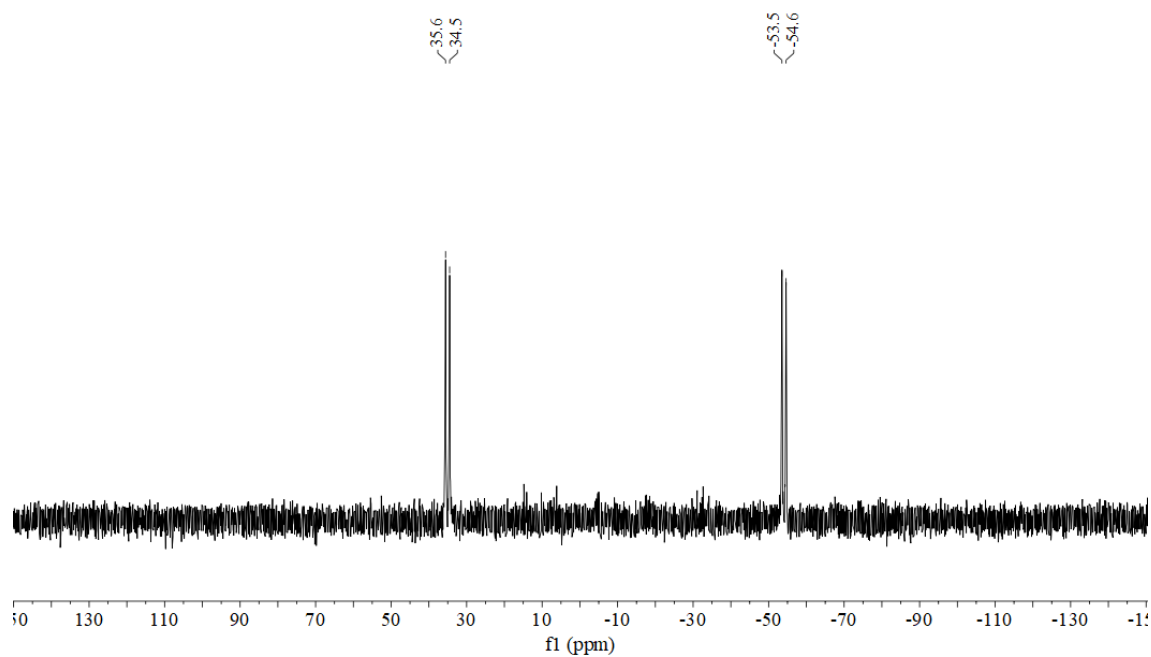

**Figure S103.**  $^{31}\text{P}\{^1\text{H}\}$  NMR of **10** in  $\text{CD}_2\text{Cl}_2$ .



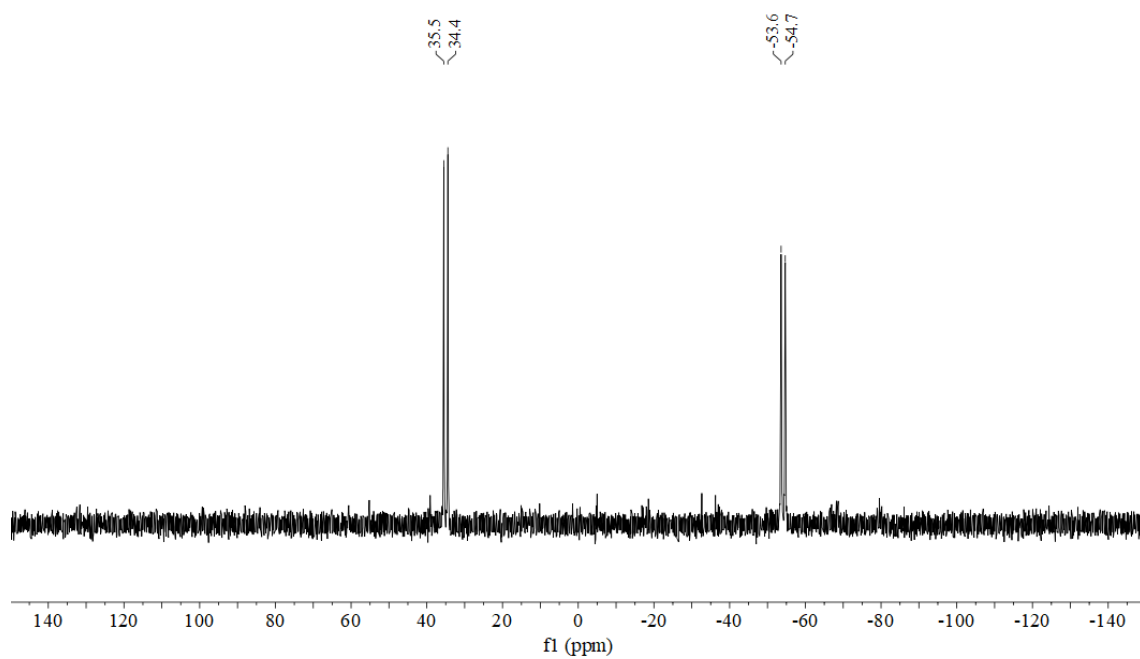

**Figure S104.**  $^{31}\text{P}$  NMR of **10** in  $\text{CD}_2\text{Cl}_2$ .

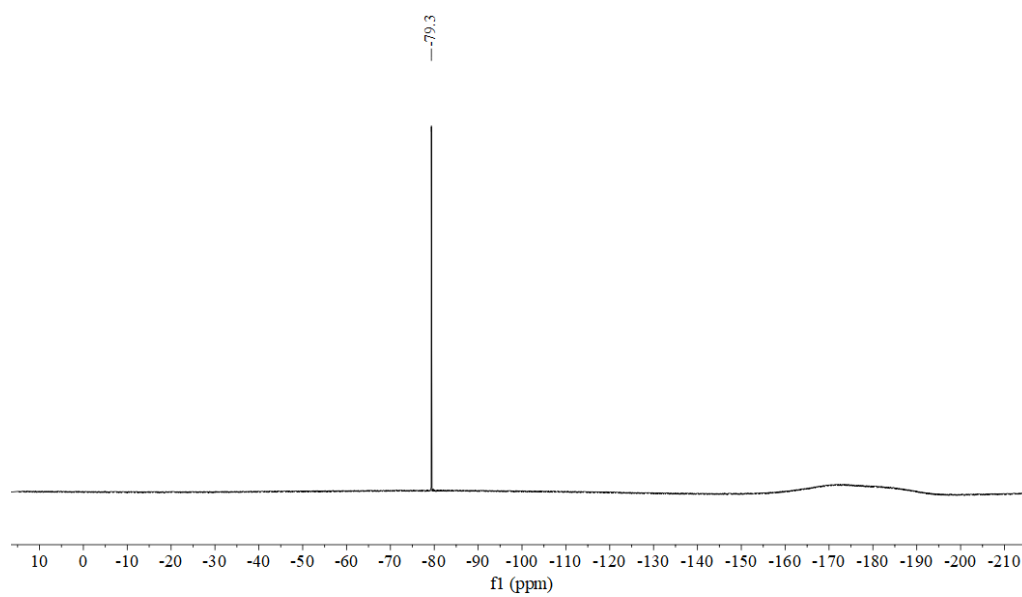

**Figure S105.**  $^{19}\text{F}\{^1\text{H}\}$  NMR of **10** in  $\text{CD}_2\text{Cl}_2$ .

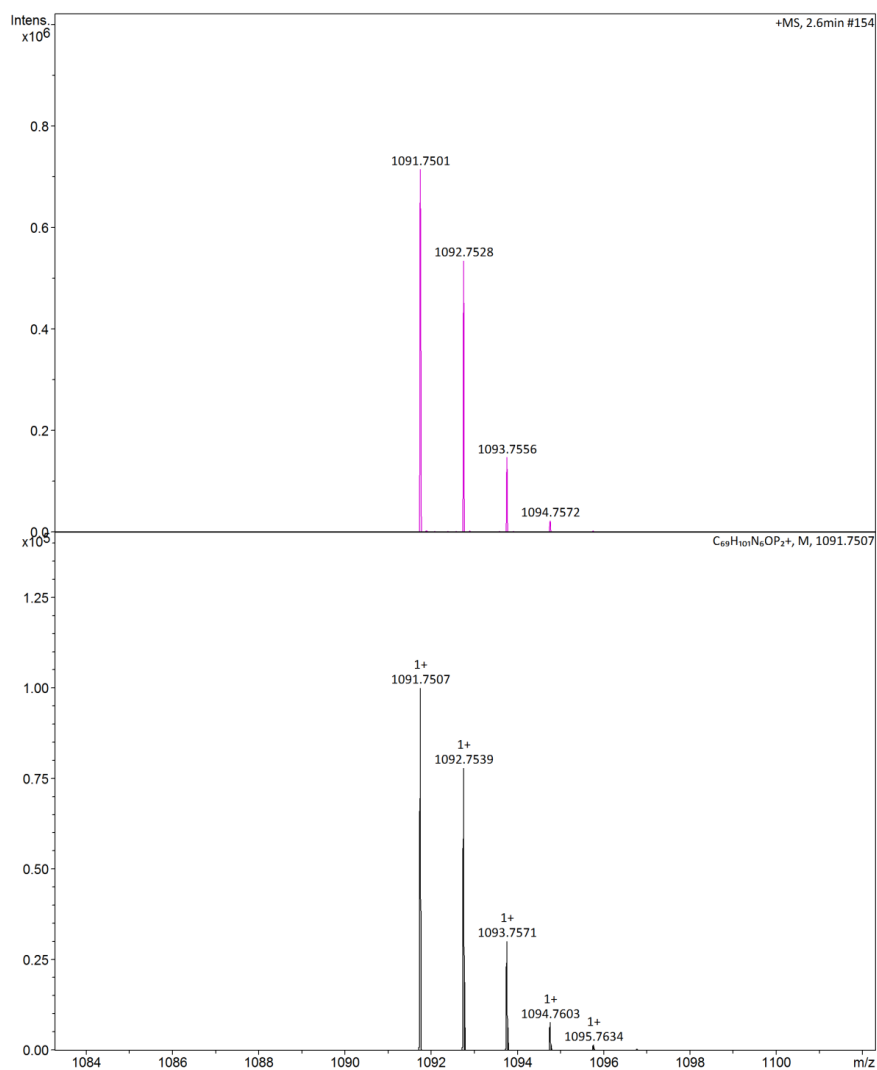

**Figure S106.** HRMS of 10.

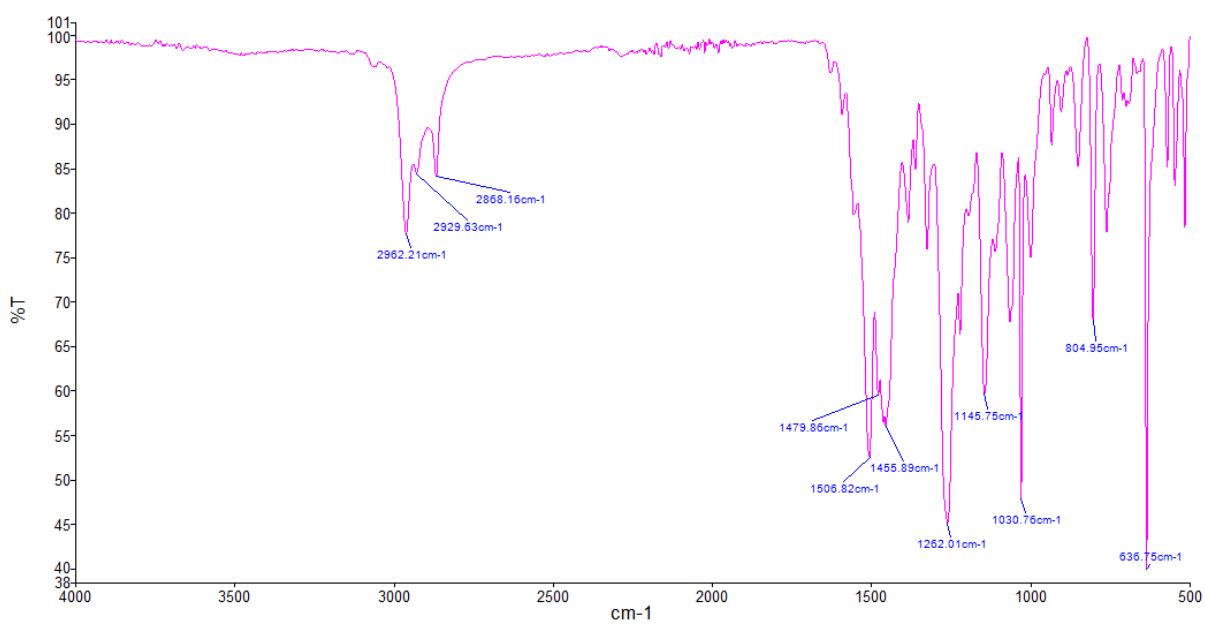

**Figure S107.** IR spectrum of 10.

## Synthesis of 11:

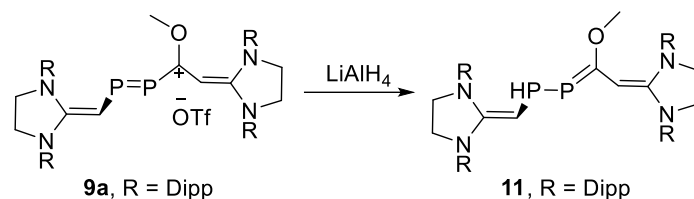

Lithium aluminium hydride ( $\text{LiAlH}_4$ , 2 mg, 0.05 mmol) in tetrahydrofuran (1 mL) was added to a stirred solution of **9a** (50 mg, 0.05 mmol) in tetrahydrofuran (10 mL) at room temperature. After stirring for 0.5 hour, the solvent was removed under reduced pressure and the residue was extracted with hexane (20 mL). Then, the solvent was removed under reduced pressure to afford crude product **11** (31 mg, yield = 62 %) as a light yellow oil.  $^1\text{H}$  NMR (600.2 MHz,  $\text{C}_6\text{D}_6$ ):  $\delta$  = 7.30 (t,  $J$  = 7.7 Hz, 1 H,  $\text{C}_{\text{Ar}}\text{H}$ ), 7.26 (t,  $J$  = 7.6 Hz, 1 H,  $\text{C}_{\text{Ar}}\text{H}$ ), 7.14 (d,  $J$  = 4.6 Hz, 1 H,  $\text{C}_{\text{Ar}}\text{H}$ ), 7.10-7.12 (m, 2 H,  $\text{C}_{\text{Ar}}\text{H}$ ), 7.09-7.04 (m, 4 H,  $\text{C}_{\text{Ar}}\text{H}$ ), 7.00-6.97 (m, 2 H,  $\text{C}_{\text{Ar}}\text{H}$ ), 6.94-6.93 (m, 1 H,  $\text{C}_{\text{Ar}}\text{H}$ ), 4.35 (s, 1 H,  $\text{C}(\text{OMe})\text{-CH=}$ ), 3.77 (d,  $^2J_{\text{PH}}$  = 6.3 Hz, 1 H,  $=\text{CH-P}(\text{H})\text{P}$ ), 3.32-3.47 (m,  $\text{NCH}_2$  or  $\text{CH}(\text{CH}_3)_2$  or  $\text{P}(\text{H})$ , 10 H), 3.23 (m,  $\text{NCH}_2$  or  $\text{CH}(\text{CH}_3)_2$  or  $\text{P}(\text{H})$ , 3 H), 3.15 (m,  $\text{NCH}_2$  or  $\text{CH}(\text{CH}_3)_2$  or  $\text{P}(\text{H})$ , 1 H), 3.09 (m,  $\text{NCH}_2$  or  $\text{CH}(\text{CH}_3)_2$  or  $\text{P}(\text{H})$ , 1 H), 3.04 (m,  $\text{NCH}_2$  or  $\text{CH}(\text{CH}_3)_2$  or  $\text{P}(\text{H})$ , 2 H), 2.96 (d,  $^4J_{\text{PH}}$  = 1.7 Hz, 1 H,  $\text{OCH}_3$ ), 1.46 (d,  $J$  = 6.8 Hz, 3 H,  $\text{CH}(\text{CH}_3)_2$ ), 1.40 (t,  $J$  = 6.4 Hz, 6 H,  $\text{CH}(\text{CH}_3)_2$ ), 1.35 (d,  $J$  = 6.9 Hz, 3 H,  $\text{CH}(\text{CH}_3)_2$ ), 1.29 (d,  $J$  = 7.0 Hz, 3 H,  $\text{CH}(\text{CH}_3)_2$ ), 1.26 (m, 6 H,  $\text{CH}(\text{CH}_3)_2$ ), 1.23 (d,  $J$  = 4.8 Hz, 6 H,  $\text{CH}(\text{CH}_3)_2$ ), 1.21 (d,  $J$  = 7.2 Hz, 15 H,  $\text{CH}(\text{CH}_3)_2$ ), 1.16 (d,  $J$  = 6.7 Hz, 3 H,  $\text{CH}(\text{CH}_3)_2$ ), 1.13 (d,  $J$  = 6.9 Hz, 3 H,  $\text{CH}(\text{CH}_3)_2$ ).  $^{13}\text{C}\{^1\text{H}\}$  NMR (150.8 MHz,  $\text{C}_6\text{D}_6$ ):  $\delta$  = 205.3 (dd,  $^1J_{\text{PC}}$  = 72.6,  $^2J_{\text{PC}}$  = 10.1 Hz,  $\text{P}(\text{H})\text{-P}=\text{C}(\text{OCH}_3)$ ), 156.9 (dd,  $^2J_{\text{PC}}$  = 22.7,  $^2J_{\text{PC}}$  = 8.9 Hz,  $\text{C}=\text{CHP}(\text{H})\text{-P}=\text{C}(\text{OCH}_3)$ ), 156.1 ( $=\text{C}(\text{OCH}_3)\text{-CH}=\text{C}$ ), 149.2 ( $\text{C}_{\text{Ar}}$ ), 148.8 ( $\text{C}_{\text{Ar}}$ ), 148.7 ( $\text{C}_{\text{Ar}}$ ), 148.6 ( $\text{C}_{\text{Ar}}$ ), 148.3 ( $\text{C}_{\text{Ar}}$ ), 148.2 ( $\text{C}_{\text{Ar}}$ ), 147.8 ( $\text{C}_{\text{Ar}}$ ), 146.4 ( $\text{C}_{\text{Ar}}$ ), 145.9 ( $\text{C}_{\text{Ar}}$ ), 145.9 ( $\text{C}_{\text{Ar}}$ ), 140.1 ( $\text{C}_{\text{Ar}}$ ), 140.0 ( $\text{C}_{\text{Ar}}$ ), 138.8 ( $\text{C}_{\text{Ar}}$ ), 138.7 ( $\text{C}_{\text{Ar}}$ ), 137.2 ( $\text{C}_{\text{Ar}}$ ), 136.7 ( $\text{C}_{\text{Ar}}$ ), 135.8 ( $\text{C}_{\text{Ar}}$ ), 128.6 ( $\text{C}_{\text{Ar}}$ ), 124.6 ( $\text{C}_{\text{Ar}}$ ), 124.4 ( $\text{C}_{\text{Ar}}$ ), 82.4 (dd,  $^1J_{\text{PC}}$  = 27.6,  $^2J_{\text{PC}}$  = 11.3 Hz,  $\text{P}(\text{H})\text{-P-C}(\text{OCH}_3)\text{-CH=}$ ), 55.4 ( $\text{NCH}_2$ ), 55.1 ( $\text{NCH}_2$ ), 53.6 ( $\text{NCH}_2$ ), 52.9 (dd,  $^2J_{\text{PC}}$  = 28.1,  $^3J_{\text{PC}}$  = 9.2 Hz,  $=\text{CHP}(\text{H})\text{-P-}$ ), 52.2 ( $\text{OCH}_3$ ), 51.9 ( $\text{NCH}_2$ ), 50.5 ( $\text{NCH}_2$ ), 50.2 ( $\text{NCH}_2$ ), 49.9 ( $\text{NCH}_2$ ), 49.8 ( $\text{NCH}_2$ ), 29.1, 29.0, 29.0, 28.9, 28.9, 28.8, 28.7, 25.7, 25.4, 25.3, 25.2, 24.9, 24.8, 24.6, 24.3, 24.1, 24.0, 23.7.  $^{31}\text{P}\{^1\text{H}\}$  NMR (243 MHz,  $\text{C}_6\text{D}_6$ ):  $\delta$  = 49.9 (d,  $^1J_{\text{PP}}$  = 218.9 Hz,  $\text{HP-P-C}(\text{OCH}_3)$ ), -105.4 (d,  $^1J_{\text{PP}}$  = 218.9 Hz,  $\text{HP-P-C}(\text{OCH}_3)$ ).  $^{31}\text{P}$  NMR (243 MHz,  $\text{C}_6\text{D}_6$ ):  $\delta$  = 49.9 (d,  $^1J_{\text{PP}}$  = 218.9 Hz,  $\text{HP-P-C}(\text{OCH}_3)$ ), -105.4 (d,  $^1J_{\text{PP}}$  = 218.9 Hz,  $^1J_{\text{PH}}$  = 179.8



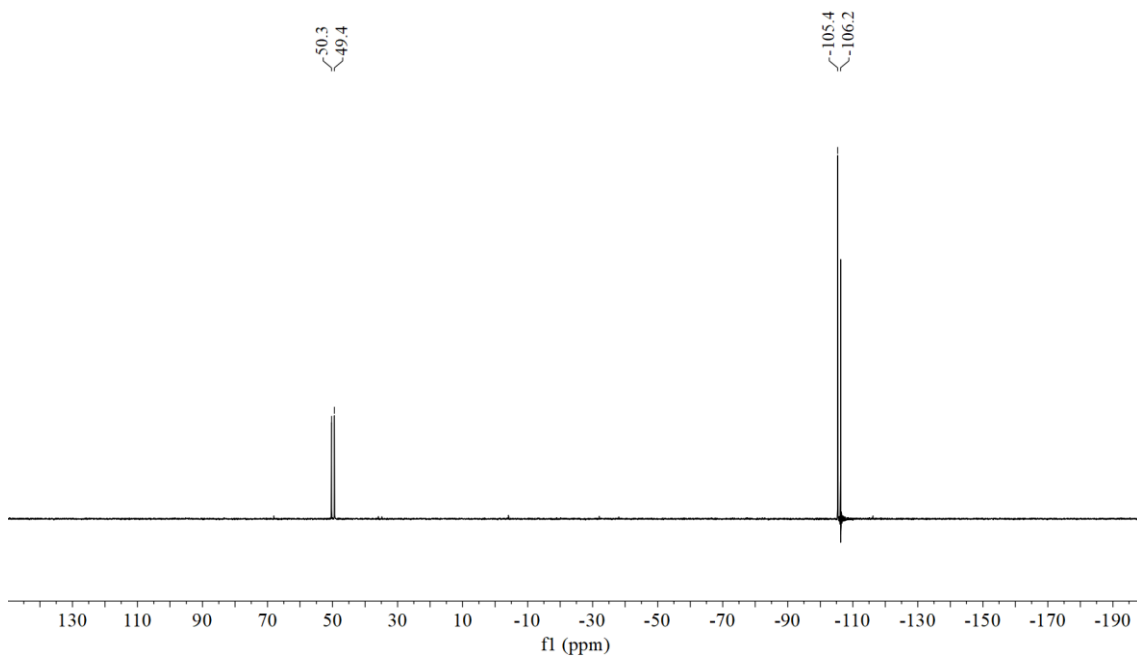

Figure S110.  $^{31}\text{P}\{^1\text{H}\}$  NMR of **11** in  $\text{C}_6\text{D}_6$ .

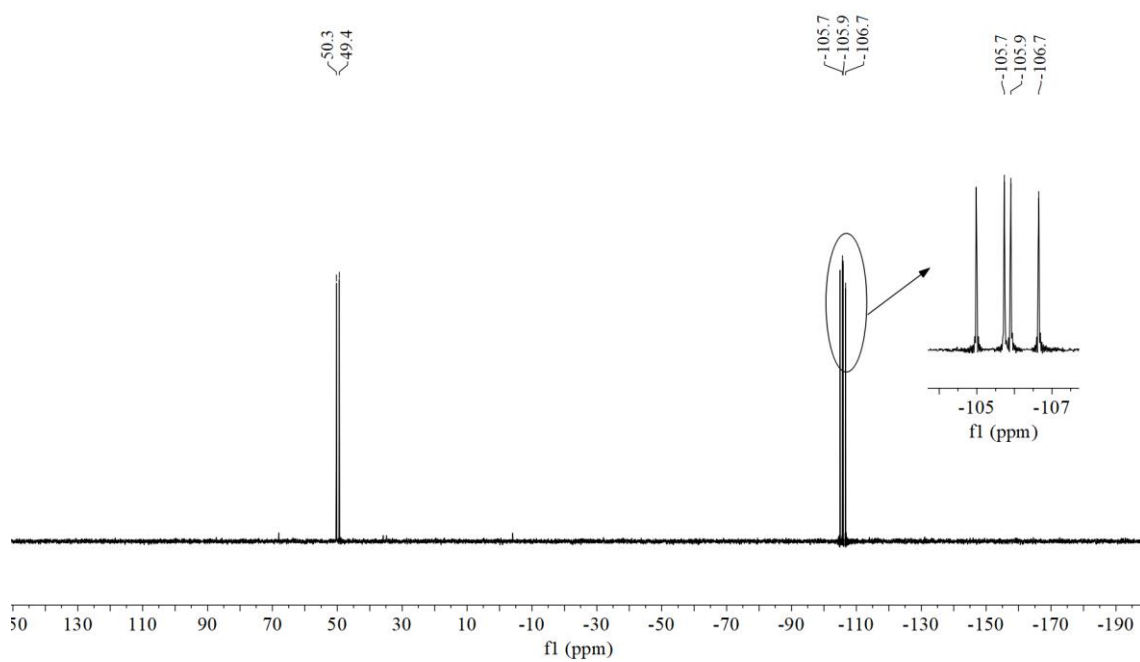

Figure S111.  $^{31}\text{P}$  NMR of **11** in  $\text{C}_6\text{D}_6$ .

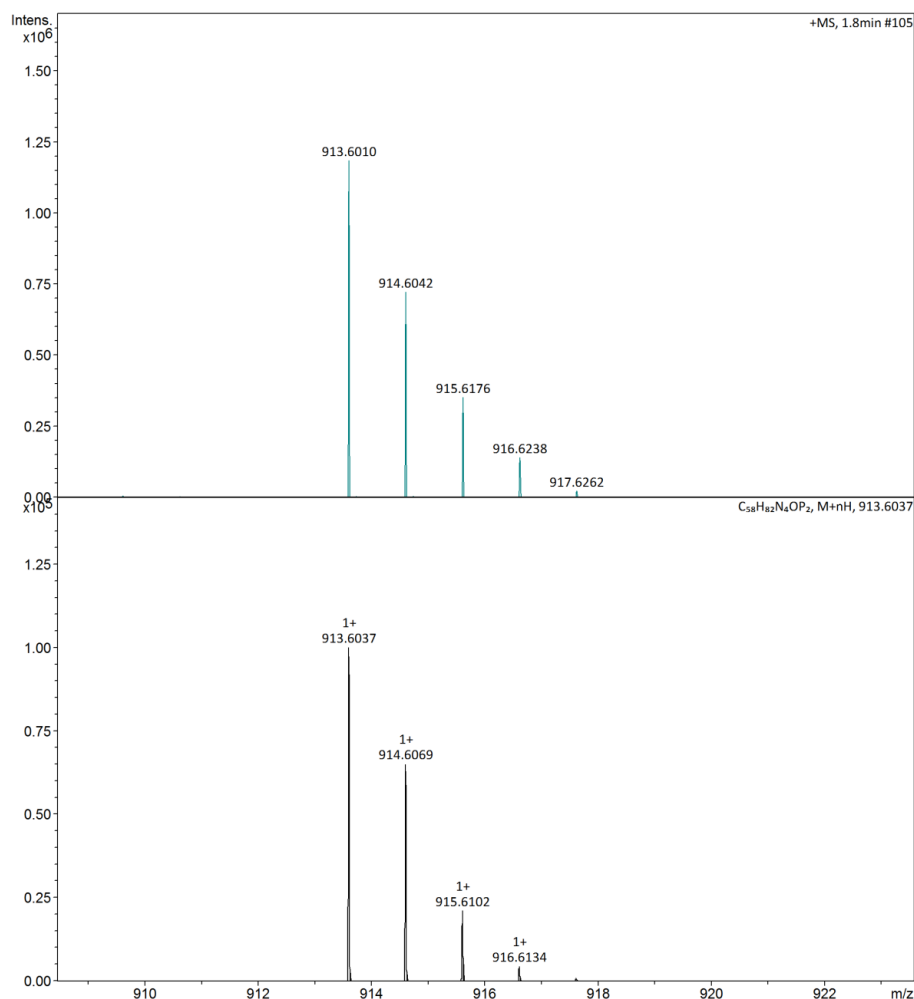

**Figure S112.** HRMS of **11**.

### Synthesis of **14**:

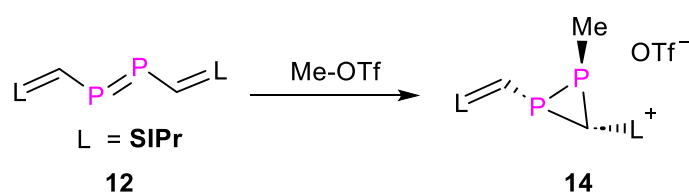

Methyl trifluoromethanesulfonate (Me-OTf) (18 mg, 0.1 mmol) in hexane (10 mL) was added to a stirred solution of **12** (100 mg, 0.1 mmol) in hexane (30 mL) at room temperature. After stirring at room temperature for 0.5 h, the resulting precipitates were collected via filtration, then washed with hexane ( $2 \times 2$  mL) and dried *in vacuo* to afford **14** (103 mg, yield = 91 %) as a yellow powder. Yellow crystals of **14** were obtained from a saturated solution of fluorobenzene and hexane stored at  $-30$  °C for 7 days.  $^1\text{H}$  NMR (600.2 MHz,  $\text{CD}_3\text{CN}$ ):  $\delta = 7.43$  (t,  $J = 7.7$  Hz, 3 H,  $\text{C}_{\text{Ar}}\text{H}$ ), 7.31 (t,  $J = 7.7$  Hz, 3 H,  $\text{C}_{\text{Ar}}\text{H}$ ), 7.11 (d,  $J = 7.7$  Hz, 6 H,  $\text{C}_{\text{Ar}}\text{H}$ ), 4.35

(s, 1 H, C=CH), 4.17 (br., 2 H, NCH<sub>2</sub>), 4.03 (br., 2 H, NCH<sub>2</sub>), 3.73(s, 4 H, NCH<sub>2</sub>), 3.65 (m, 1 H, C<sup>+</sup>-CH), 2.95 (m, 8 H, CH(CH<sub>3</sub>)<sub>2</sub>), 2.56 (br., 3 H, PCH<sub>3</sub>), 1.27 (d, *J* = 6.9 Hz, 9 H, CH(CH<sub>3</sub>)<sub>2</sub>), 1.19 (d, *J* = 6.6 Hz, 9 H, CH(CH<sub>3</sub>)<sub>2</sub>), 1.14 (d, *J* = 6.7 Hz, 18 H, CH(CH<sub>3</sub>)<sub>2</sub>), 1.09 (br., 3 H, CH(CH<sub>3</sub>)<sub>2</sub>), 0.76 (m, 6 H, CH(CH<sub>3</sub>)<sub>2</sub>), 0.30 (d, *J* = 6.8 Hz, 3 H, CH(CH<sub>3</sub>)<sub>2</sub>). <sup>13</sup>C{<sup>1</sup>H} NMR (150.8 MHz, CD<sub>3</sub>CN): δ = 172.6 (m, NCN<sup>+</sup>), 162.30 (d, <sup>2</sup>*J*<sub>PC</sub> = 15.4 Hz, NCN), 147.2 (C<sub>Ar</sub>), 135.1 (C<sub>Ar</sub>), 132.2 (C<sub>Ar</sub>), 131.2 (C<sub>Ar</sub>), 130.4 (C<sub>Ar</sub>), 126.2 (CF<sub>3</sub>), 53.2 (NCH<sub>2</sub>), 51.5 (NCH<sub>2</sub>), 50.1 (dd, <sup>1</sup>*J*<sub>PC</sub> = 53.6 Hz, <sup>2</sup>*J*<sub>PC</sub> = 3.9 Hz, C=CHPP), 35.3 (dd, <sup>1</sup>*J*<sub>PC</sub> = 49.6, <sup>1</sup>*J*<sub>PC</sub> = 38.9 Hz, PCHP), 29.6, 29.0, 26.0, 25.2, 24.9, 24.5, 24.2, 6.71 (d, <sup>1</sup>*J*<sub>PC</sub> = 45.7 Hz, PCH<sub>3</sub>). <sup>31</sup>P{<sup>1</sup>H} NMR (242.9 MHz, CD<sub>3</sub>CN): δ = -120.2 (d, <sup>1</sup>*J*<sub>PP</sub> = 184.6 Hz, P(CH<sub>3</sub>)PCH), -124.9 (d, <sup>1</sup>*J*<sub>PP</sub> = 184.5 Hz, P(CH<sub>3</sub>)PCH). <sup>31</sup>P NMR (242.9 MHz, CD<sub>3</sub>CN): δ = -120.2 (d, <sup>1</sup>*J*<sub>PP</sub> = 184.6 Hz, P(CH<sub>3</sub>)PCH), -124.9 (dd, <sup>1</sup>*J*<sub>PP</sub> = 184.5 Hz, <sup>2</sup>*J*<sub>PH</sub> = 5.8 Hz, P(CH<sub>3</sub>)PCH). <sup>19</sup>F{<sup>1</sup>H} NMR (565 MHz, CD<sub>3</sub>CN): δ = -79.3. UV/Vis (acetonitrile, λ (nm) ε(M<sup>-1</sup>cm<sup>-1</sup>)): 328.0 (54024.3), 472.0 (5748.5). HRMS (ESI, m/z) calc. for: C<sub>57</sub>H<sub>81</sub>N<sub>4</sub>P<sub>2</sub><sup>+</sup>: 883.5931 [M]; found: 883.5927.

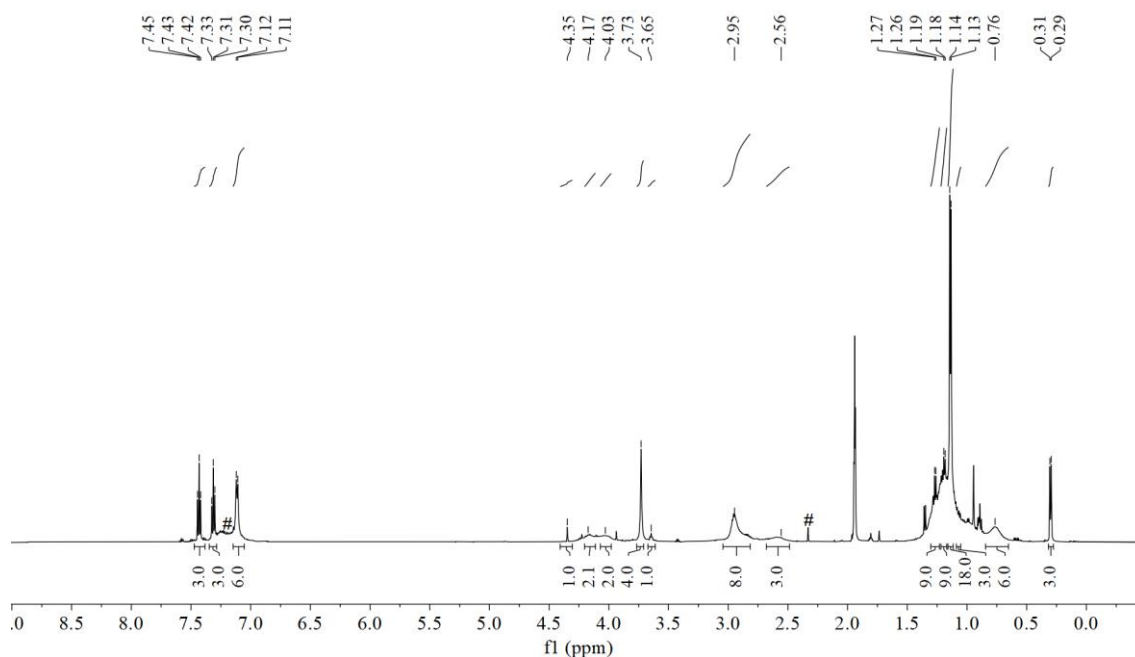

**Figure S113.** <sup>1</sup>H NMR of **14** in CD<sub>3</sub>CN. #Toluene.

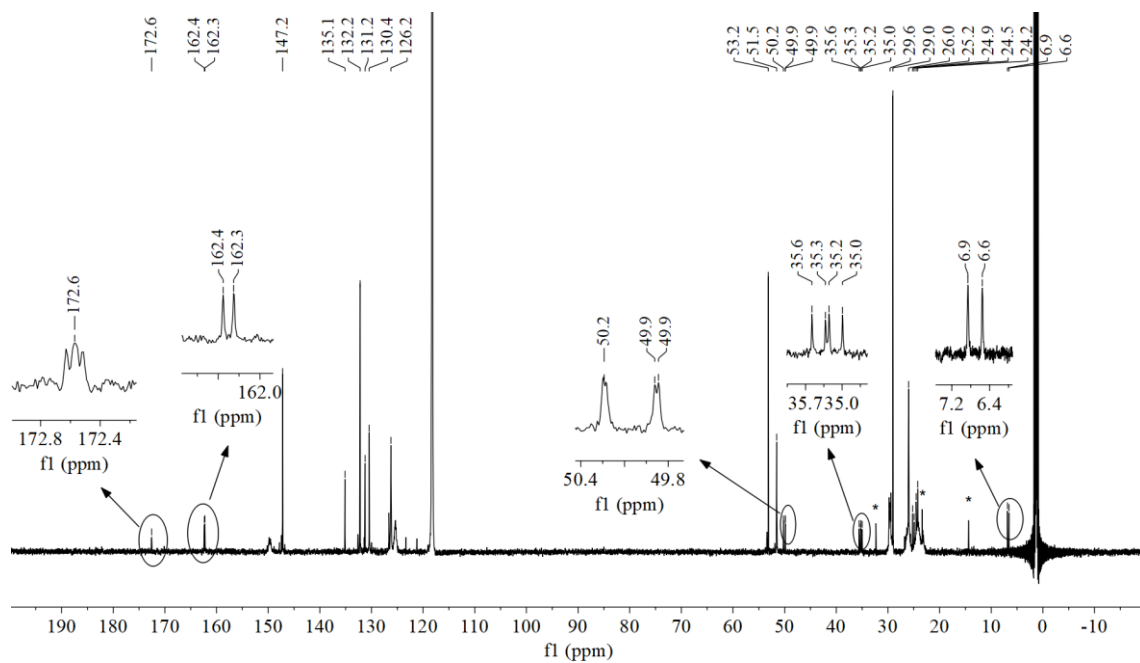

**Figure S114.**  $^{13}\text{C}\{^1\text{H}\}$  NMR of **14** in  $\text{CD}_3\text{CN}$ . #Hexane.

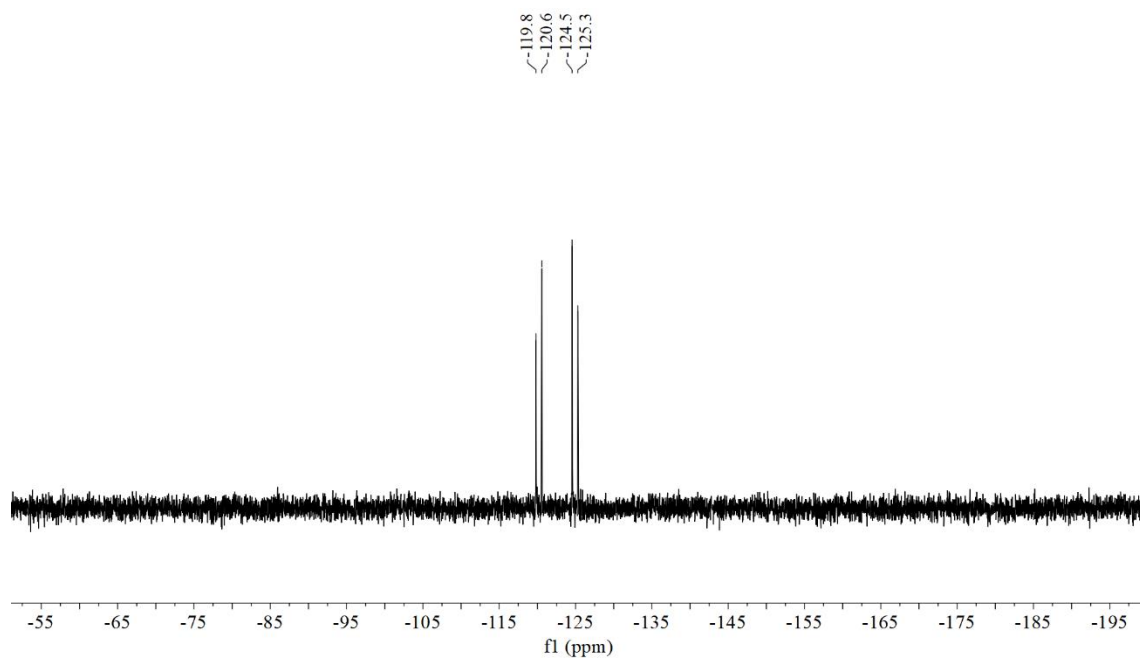

**Figure S115.**  $^{31}\text{P}\{^1\text{H}\}$  NMR of **14** in  $\text{CD}_3\text{CN}$ .



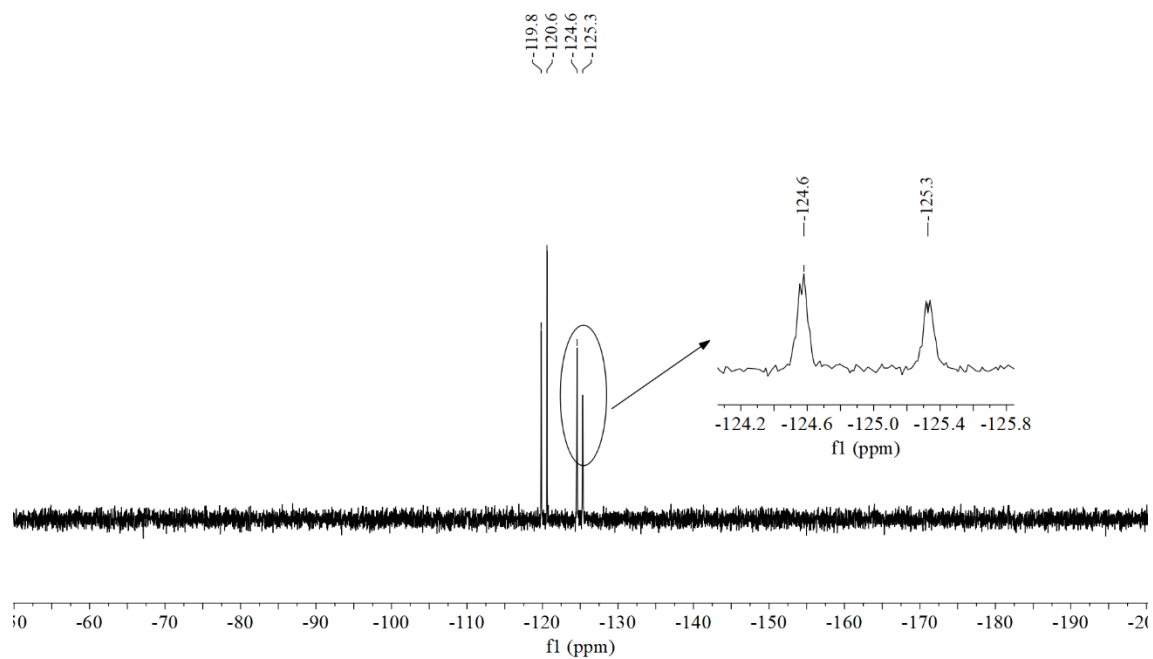

**Figure S116.**  $^{31}\text{P}$  NMR of **14** in  $\text{CD}_3\text{CN}$ .

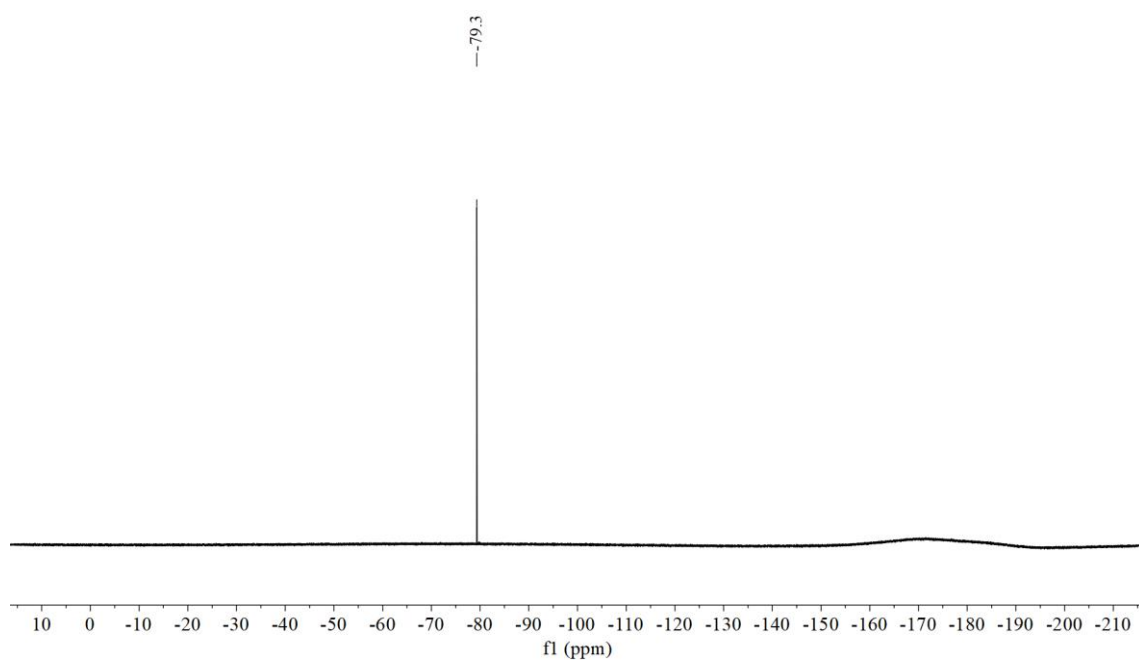

**Figure S117.**  $^{19}\text{F}\{^1\text{H}\}$  NMR of **14** in  $\text{CD}_3\text{CN}$ .

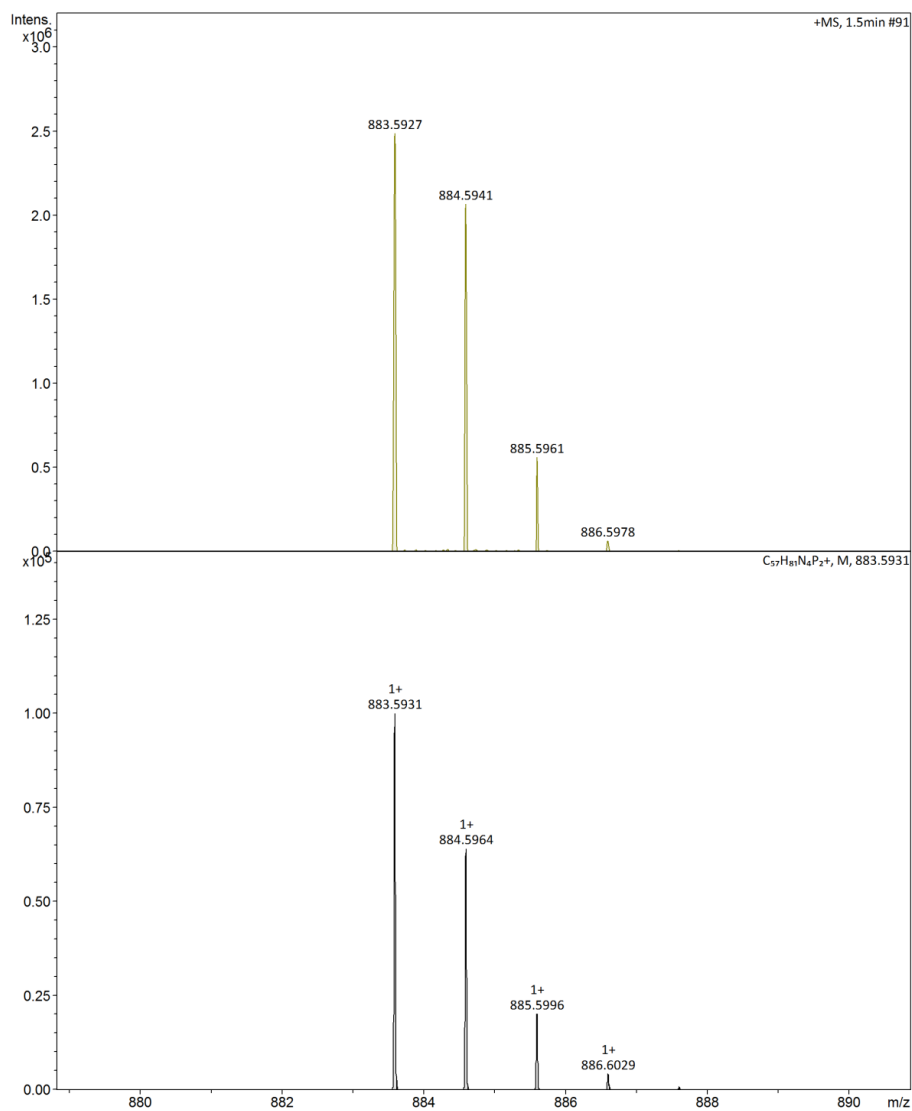

**Figure S118.** HRMS of **14**.

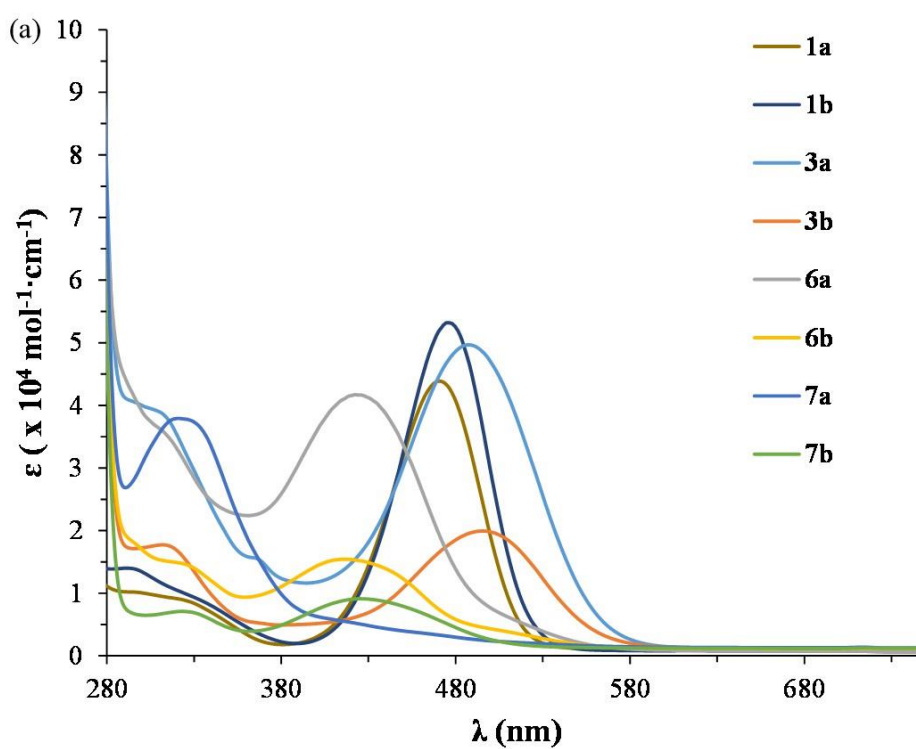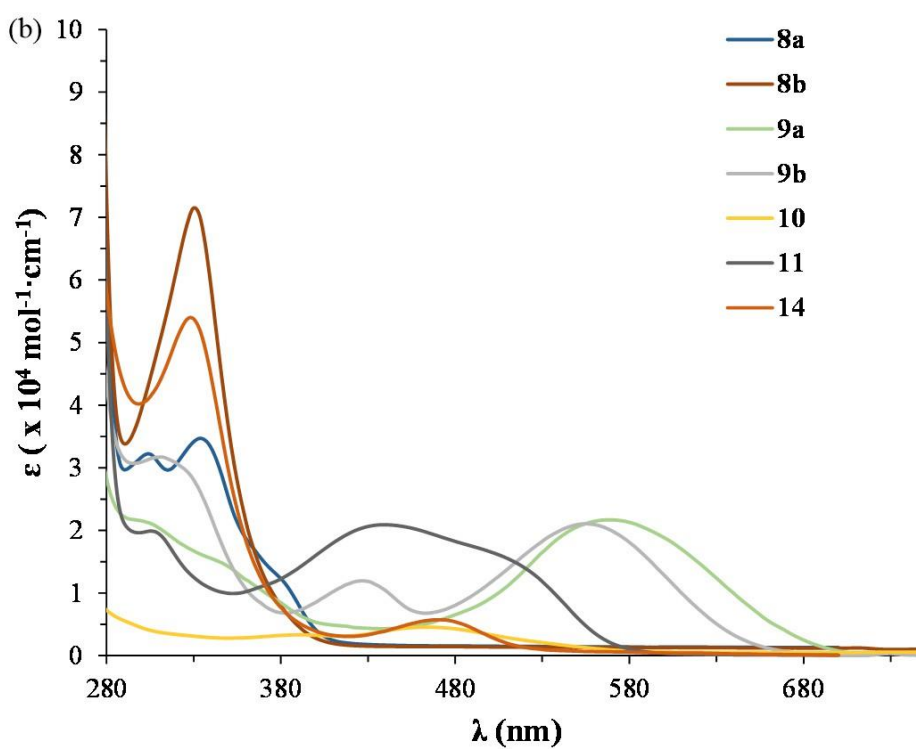

**Figure S119.** (a) UV-Vis absorption spectra of the acetonitrile solution of **1a**, **1b**, and toluene solution of **3a**, **3b**, **6a**, **6b**, **7a**, **7b**. (b) UV-Vis absorption spectra of the acetonitrile solution of **9a**, **9b**, **10**, **14**, and toluene solution of **11**.

## S2. X-Ray diffraction studies

These data can be obtained free of charge via <http://www.ccdc.cam.ac.uk/cgi-bin/catreq.cgi>, or by emailing [data\\_request@ccdc.cam.ac.uk](mailto:data_request@ccdc.cam.ac.uk). The CCDC reference numbers are 2343829, 2343830, 2343833-2343835, 2346470, and 2385608.

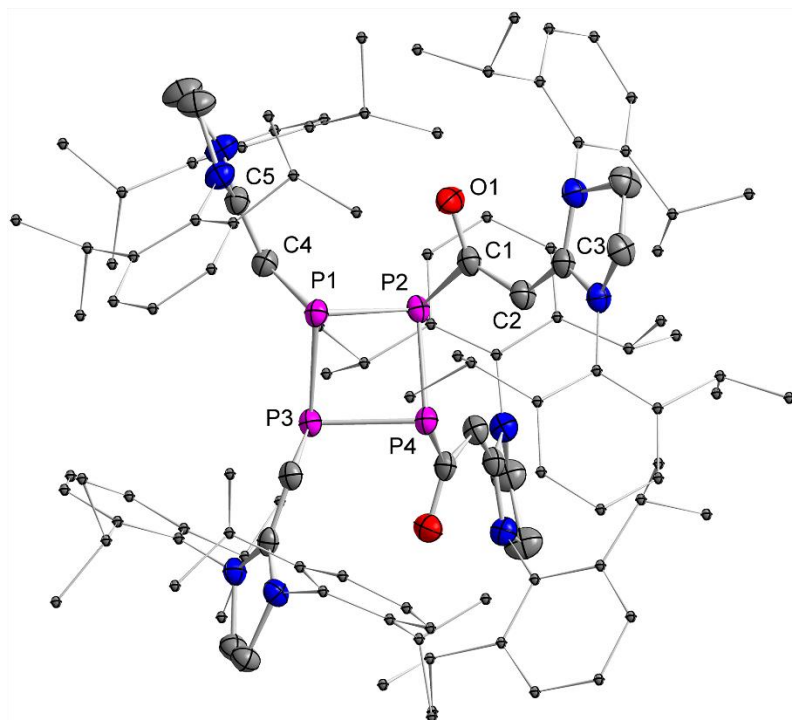

**Figure S120.** Solid-state structure of **3a\_dimer** (Ellipsoids are set to 50% probability; H atoms are omitted for clarity). Selected distances (Å): P1-P2 2.2431(5), P1-P3 2.2563(6), P2-P4 2.2018(6), P3-P4 2.2441(5), P2-C1 1.8811(17), C1-O1 1.238(2), C1-C2 1.426(2), C2-C3 1.376(2), P1-C4 1.7877(17), C4-C5 1.359(2).

**Table S1.** The summary of crystal data and structure refinement

| Compounds         | <b>3a</b>                                                      | <b>3b</b>                                                      | <b>6a</b>                                                                         |
|-------------------|----------------------------------------------------------------|----------------------------------------------------------------|-----------------------------------------------------------------------------------|
| CCDC              | 2343829                                                        | 2346470                                                        | 2343833                                                                           |
| Empirical formula | C <sub>57</sub> H <sub>78</sub> N <sub>4</sub> OP <sub>2</sub> | C <sub>63</sub> H <sub>82</sub> N <sub>4</sub> OP <sub>2</sub> | C <sub>69</sub> H <sub>100</sub> FKN <sub>5</sub> OP <sub>2</sub> Si <sub>2</sub> |
| Formula weight    | 897.17                                                         | 973.26                                                         | 1191.75                                                                           |
| Temperature/K     | 149.99(10)                                                     | 100.00(10)                                                     | 150.00                                                                            |
| Crystal system    | tetragonal                                                     | orthorhombic                                                   | triclinic                                                                         |
| Space group       | P-42 <sub>1</sub> c                                            | P2 <sub>1</sub> 2 <sub>1</sub> 2 <sub>1</sub>                  | P-1                                                                               |
| a/Å               | 27.95760(10)                                                   | 10.5100(2)                                                     | 12.0896(6)                                                                        |
| b/Å               | 27.95760(10)                                                   | 18.2431(3)                                                     | 16.0159(8)                                                                        |
| c/Å               | 15.51230(10)                                                   | 30.1703(7)                                                     | 21.5597(11)                                                                       |

|                                                |                                                                     |                                                                |                                                                              |
|------------------------------------------------|---------------------------------------------------------------------|----------------------------------------------------------------|------------------------------------------------------------------------------|
| $\alpha/^\circ$                                | 90                                                                  | 90                                                             | 98.712(2)                                                                    |
| $\beta/^\circ$                                 | 90                                                                  | 90                                                             | 103.862(2)                                                                   |
| $\gamma/^\circ$                                | 90                                                                  | 90                                                             | 98.212(2)                                                                    |
| Volume/ $\text{\AA}^3$                         | 12124.84(12)                                                        | 5784.7(2)                                                      | 3935.8(3)                                                                    |
| Z                                              | 8                                                                   | 4                                                              | 2                                                                            |
| $\rho_{\text{calc}}/\text{cm}^3$               | 0.983                                                               | 1.118                                                          | 1.006                                                                        |
| $\mu/\text{mm}^{-1}$                           | 0.919                                                               | 1.001                                                          | 1.038                                                                        |
| F(000)                                         | 3888.0                                                              | 2104.0                                                         | 1286.0                                                                       |
| Crystal size/ $\text{mm}^3$                    | $0.18 \times 0.16 \times 0.16$                                      | $0.09 \times 0.08 \times 0.08$                                 | $0.15 \times 0.08 \times 0.04$                                               |
| Radiation                                      | Cu K $\alpha$ ( $\lambda = 1.54184$ )                               | Cu K $\alpha$ ( $\lambda = 1.54184$ )                          | GaK $\alpha$ ( $\lambda = 1.34138$ )                                         |
| 2 $\theta$ range for data collection/ $^\circ$ | 6.322 to 148.658                                                    | 5.662 to 151.826                                               | 3.742 to 118.882                                                             |
| Index ranges                                   | $-23 \leq h \leq 34, -34 \leq k \leq 34, -19 \leq l \leq 12$        | $-12 \leq h \leq 11, -22 \leq k \leq 22, -36 \leq l \leq 36$   | $-15 \leq h \leq 15, -20 \leq k \leq 20, -27 \leq l \leq 27$                 |
| Reflections collected                          | 73809                                                               | 33798                                                          | 74751                                                                        |
| Independent reflections                        | 12206 [ $R_{\text{int}} = 0.0426, R_{\text{sigma}} = 0.0268$ ]      | 11179 [ $R_{\text{int}} = 0.0622, R_{\text{sigma}} = 0.0598$ ] | 17203 [ $R_{\text{int}} = 0.0569, R_{\text{sigma}} = 0.0474$ ]               |
| Data/restraints/parameters                     | 12206/0/593                                                         | 11179/8/658                                                    | 17203/42/770                                                                 |
| Goodness-of-fit on $F^2$                       | 1.068                                                               | 1.049                                                          | 1.079                                                                        |
| Final R indexes [ $I \geq 2\sigma(I)$ ]        | $R_1 = 0.0330, wR_2 = 0.0896$                                       | $R_1 = 0.0708, wR_2 = 0.1789$                                  | $R_1 = 0.0459, wR_2 = 0.1243$                                                |
| Final R indexes [all data]                     | $R_1 = 0.0342, wR_2 = 0.0904$                                       | $R_1 = 0.0893, wR_2 = 0.1909$                                  | $R_1 = 0.0636, wR_2 = 0.1360$                                                |
| Largest diff. peak/hole / $e \text{\AA}^{-3}$  | 0.23/-0.24                                                          | 0.83/-0.37                                                     | 0.39/-0.42                                                                   |
| Flack parameter                                | 0.011(5)                                                            | 0.022(10)                                                      |                                                                              |
| <hr/>                                          |                                                                     |                                                                |                                                                              |
| Compounds                                      | <b>7b</b>                                                           | <b>8a</b>                                                      | <b>14</b>                                                                    |
| CCDC                                           | 2343835                                                             | 2343834                                                        | 2385608                                                                      |
| Empirical formula                              | $\text{C}_{66}\text{H}_{99}\text{N}_5\text{O}_2\text{P}_2\text{Si}$ | $\text{C}_{64}\text{H}_{99}\text{N}_5\text{OP}_2\text{Si}_2$   | $\text{C}_{73}\text{H}_{93}\text{F}_6\text{N}_4\text{O}_3\text{P}_2\text{S}$ |
| Formula weight                                 | 1084.53                                                             | 1072.60                                                        | 1282.51                                                                      |
| Temperature/K                                  | 100.00(10)                                                          | 155(8)                                                         | 149.9(6)                                                                     |
| Crystal system                                 | monoclinic                                                          | orthorhombic                                                   | triclinic                                                                    |
| Space group                                    | P2 <sub>1</sub> /n                                                  | P2 <sub>1</sub> 2 <sub>1</sub> 2 <sub>1</sub>                  | P-1                                                                          |
| a/ $\text{\AA}$                                | 18.5772(2)                                                          | 15.1737(2)                                                     | 13.0834(2)                                                                   |
| b/ $\text{\AA}$                                | 16.1173(2)                                                          | 20.6058(2)                                                     | 13.3184(2)                                                                   |
| c/ $\text{\AA}$                                | 21.8954(2)                                                          | 20.9842(3)                                                     | 20.9406(3)                                                                   |
| $\alpha/^\circ$                                | 90                                                                  | 90                                                             | 79.7010(10)                                                                  |
| $\beta/^\circ$                                 | 99.6100(10)                                                         | 90                                                             | 86.7710(10)                                                                  |

|                                                |                                                                    |                                                                     |                                                                     |
|------------------------------------------------|--------------------------------------------------------------------|---------------------------------------------------------------------|---------------------------------------------------------------------|
| $\gamma/^\circ$                                | 90                                                                 | 90                                                                  | 80.6750(10)                                                         |
| Volume/ $\text{\AA}^3$                         | 6463.80(12)                                                        | 6561.05(14)                                                         | 3541.26(9)                                                          |
| Z                                              | 4                                                                  | 4                                                                   | 2                                                                   |
| $\rho_{\text{calc}}/\text{cm}^3$               | 1.114                                                              | 1.086                                                               | 1.203                                                               |
| $\mu/\text{mm}^{-1}$                           | 1.126                                                              | 1.261                                                               | 1.352                                                               |
| F(000)                                         | 2360.0                                                             | 2336.0                                                              | 1366.0                                                              |
| Crystal size/ $\text{mm}^3$                    | $0.06 \times 0.05 \times 0.03$                                     | $0.18 \times 0.16 \times 0.15$                                      | $0.09 \times 0.08 \times 0.06$                                      |
| Radiation                                      | Cu K $\alpha$ ( $\lambda = 1.54184$ )                              | Cu K $\alpha$ ( $\lambda = 1.54184$ )                               | Cu K $\alpha$ ( $\lambda = 1.54184$ )                               |
| 2 $\Theta$ range for data collection/ $^\circ$ | 5.784 to 103.646                                                   | 7.19 to 144.804                                                     | 6.828 to 145.374                                                    |
| Index ranges                                   | $-18 \leq h \leq 18, -16 \leq k \leq 16,$<br>$-22 \leq l \leq 22$  | $-16 \leq h \leq 18, -22 \leq k \leq 25,$<br>$-23 \leq l \leq 25$   | $-16 \leq h \leq 16, -16 \leq k \leq 15,$<br>$-25 \leq l \leq 25$   |
| Reflections collected                          | 67186                                                              | 21497                                                               | 63032                                                               |
| Independent reflections                        | 7107 [ $R_{\text{int}} = 0.0337,$<br>$R_{\text{sigma}} = 0.0136$ ] | 12465 [ $R_{\text{int}} = 0.0283,$<br>$R_{\text{sigma}} = 0.0347$ ] | 13789 [ $R_{\text{int}} = 0.0274,$<br>$R_{\text{sigma}} = 0.0185$ ] |
| Data/restraints/parameters                     | 7107/0/708                                                         | 12465/0/690                                                         | 13789/0/828                                                         |
| Goodness-of-fit on $F^2$                       | 1.038                                                              | 1.046                                                               | 1.038                                                               |
| Final R indexes [ $I \geq 2\sigma(I)$ ]        | $R_1 = 0.0319, wR_2 = 0.0794$                                      | $R_1 = 0.0436, wR_2 = 0.1140$                                       | $R_1 = 0.0587, wR_2 = 0.1671$                                       |
| Final R indexes [all data]                     | $R_1 = 0.0346, wR_2 = 0.0809$                                      | $R_1 = 0.0460, wR_2 = 0.1172$                                       | $R_1 = 0.0652, wR_2 = 0.1743$                                       |
| Largest diff. peak/hole / $e \text{\AA}^{-3}$  | 0.18/-0.25                                                         | 0.87/-0.24                                                          | 0.99/-0.65                                                          |
| Flack parameter                                |                                                                    | 0.010(6)                                                            |                                                                     |

|                   |                                                              |
|-------------------|--------------------------------------------------------------|
| Compounds         | <b>3a_dimer</b>                                              |
| CCDC              | 2343830                                                      |
| Empirical formula | $\text{C}_{114}\text{H}_{156}\text{N}_8\text{O}_2\text{P}_4$ |
| Formula weight    | 1794.34                                                      |
| Temperature/K     | 149.99(10)                                                   |
| Crystal system    | monoclinic                                                   |
| Space group       | I2/c                                                         |
| a/ $\text{\AA}$   | 27.6579(4)                                                   |
| b/ $\text{\AA}$   | 15.0908(2)                                                   |
| c/ $\text{\AA}$   | 57.5737(9)                                                   |
| $\alpha/^\circ$   | 90                                                           |
| $\beta/^\circ$    | 97.571(2)                                                    |

---

|                                               |                                                                       |
|-----------------------------------------------|-----------------------------------------------------------------------|
| $\gamma/^\circ$                               | 90                                                                    |
| Volume/ $\text{\AA}^3$                        | 23820.6(6)                                                            |
| Z                                             | 8                                                                     |
| $\rho_{\text{calc}}/\text{cm}^3$              | 1.001                                                                 |
| $\mu/\text{mm}^{-1}$                          | 0.936                                                                 |
| F(000)                                        | 7776.0                                                                |
| Crystal size/ $\text{mm}^3$                   | $0.21 \times 0.16 \times 0.13$                                        |
| Radiation                                     | Cu K $\alpha$ ( $\lambda = 1.54184$ )                                 |
| $2\Theta$ range for data collection/ $^\circ$ | 6.448 to 150.8                                                        |
| Index ranges                                  | $-30 \leq h \leq 34$ , $-16 \leq k \leq 18$ ,<br>$-70 \leq l \leq 71$ |
| Reflections collected                         | 110629                                                                |
| Independent reflections                       | 23738 [ $R_{\text{int}} = 0.0903$ ,<br>$R_{\text{sigma}} = 0.0608$ ]  |
| Data/restraints/parameters                    | 23738/0/1185                                                          |
| Goodness-of-fit on $F^2$                      | 1.078                                                                 |
| Final R indexes [ $I \geq 2\sigma(I)$ ]       | $R_1 = 0.0529$ , $wR_2 =$<br>0.1312                                   |
| Final R indexes [all data]                    | $R_1 = 0.0652$ , $wR_2 =$<br>0.1423                                   |
| Largest diff. peak/hole / $e \text{\AA}^{-3}$ | 0.59/-0.56                                                            |

---

### S3: Theoretical details

Geometry optimizations were performed using the Gaussian16 optimizer.<sup>[2]</sup> All geometry optimizations were computed using the functional M06-2X functional. The Def2-SVP basis set was used for all the atoms. Frequency calculations at the same level of theory were performed to identify the number of imaginary frequencies (zero for local minimum and one for transition states) and provide the thermal corrections of Gibbs free energy. Transition states were submitted to intrinsic reaction coordinate (IRC) calculations to determine two corresponding minima. The single-point energy calculations were performed at the M06-2X/Def2-TZVP level of theory for solution-phase (toluene) for organic compounds. The gas-phase geometry was

used for all the solution phase calculations. The SMD method was used with the corresponding solvent, while the Bondi radii were chosen as the atomic radii to define the molecular cavity.<sup>[3]</sup> The Gibbs energy corrections from frequency calculations were added to the single-point energies to obtain the Gibbs free energies in solution, respectively. All the solution-phase free energies reported in the paper correspond to the reference state of 1 mol/L, 298K. TD-DFT calculations were performed at the PBE0-SMD(toluene)/def2tzvp level of theory. NBO calculations were carried out using NBO 7.0 program<sup>[4]</sup> at the M06-2X/Def2TZVP//M06-2X/Def2-SVP level of theory.

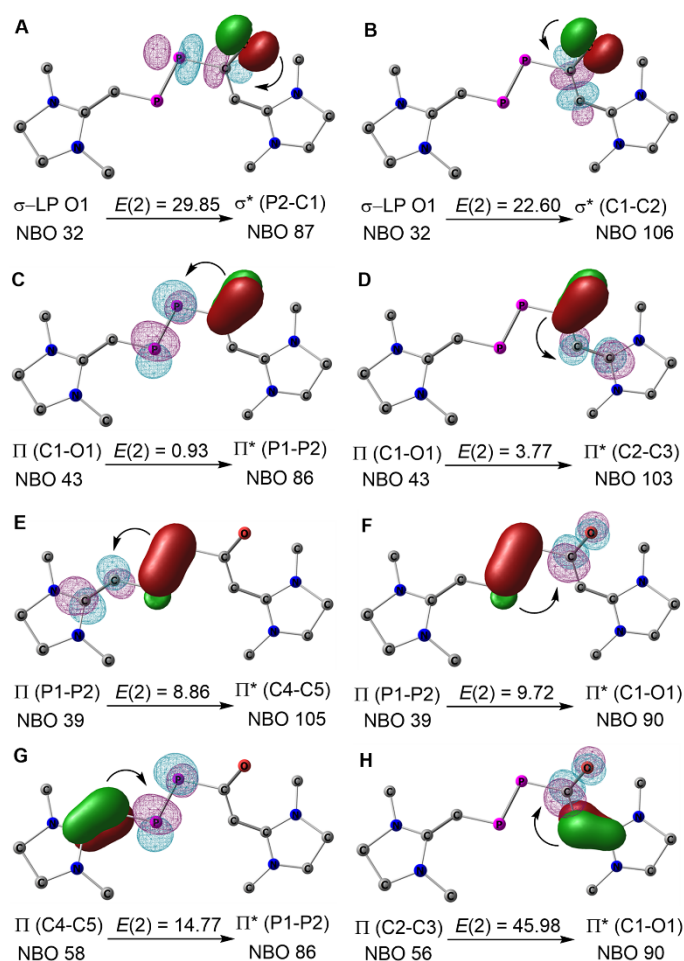

**Figure S121.** Second order perturbation analysis of **3a<sup>M</sup>** at M062X/Def2-TZVP level of theory.



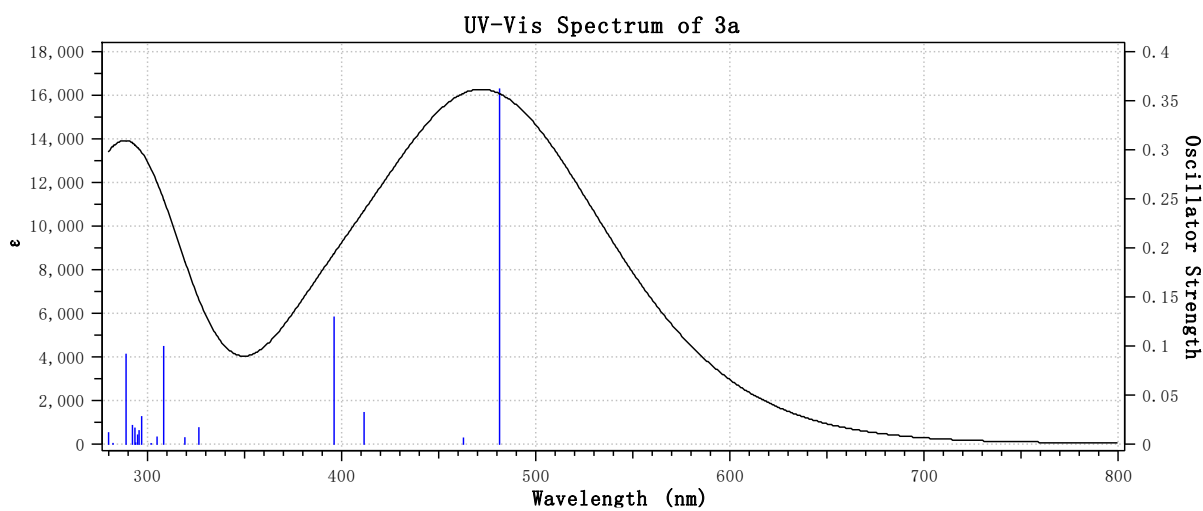

**Figure S122.** Electronic transitions of **3a** as modeled by TD-DFT.

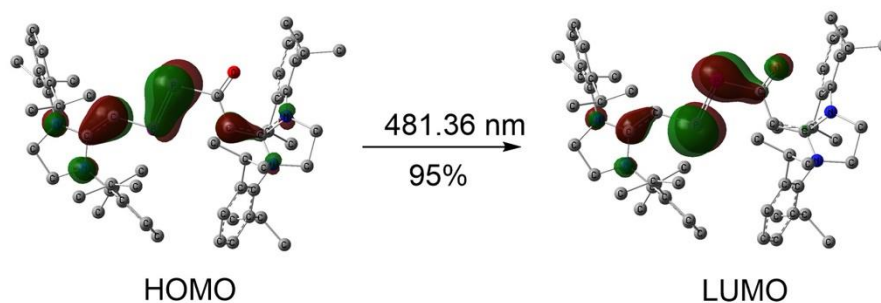

**Figure S123.** Major Kohn-Sham orbitals of **3a** for transitions at 481 nm from TD-DFT calculations.

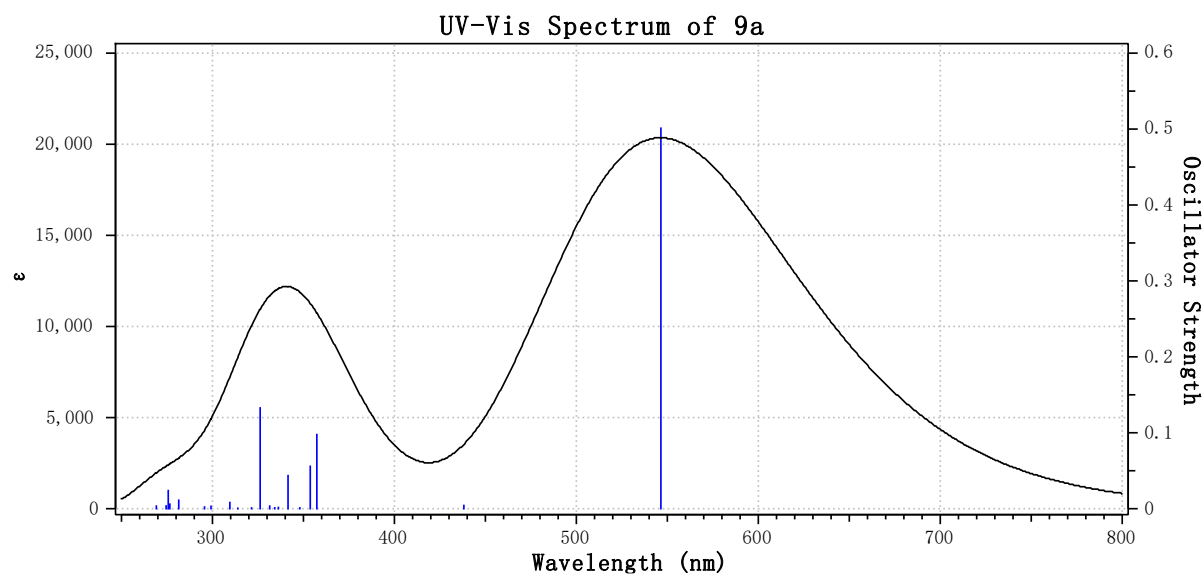

**Figure S124.** Electronic transitions of **9a** as modeled by TD-DFT.

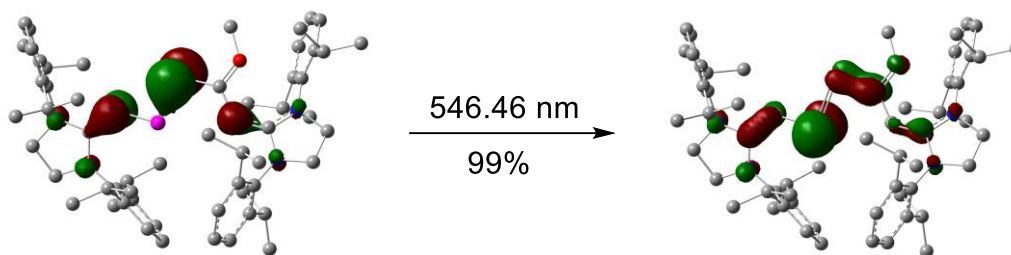

**Figure S125.** Major Kohn-Sham orbitals of **9a** for transitions at 546 nm from TD-DFT calculations.

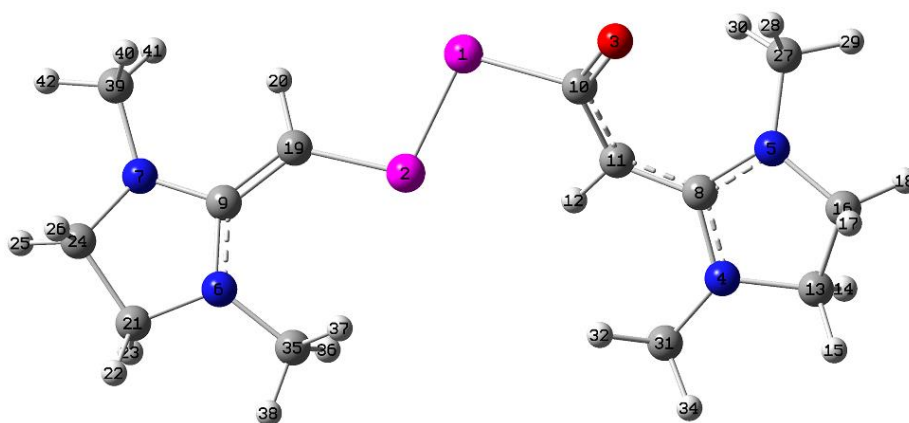

**Figure S126.** Optimized geometry of **3a<sup>M</sup>**.

**Table S2.** Calculated  $^1\text{H}$  and  $^{31}\text{P}$  NMR chemical shifts (ppm) of **3a<sup>M</sup>** at the B97-2/def2TZVP-SMD(benzene)//M062X/Def2SVP level of theory.

| Atomic number | Calculated GIAO magnetic shielding tensor | Predicted chemical shifts | Experimental chemical shifts |
|---------------|-------------------------------------------|---------------------------|------------------------------|
| H12           | 26.0491                                   | 5.5604 <sup>a</sup>       | 4.77                         |
| H20           | 25.0390                                   | 6.5705 <sup>a</sup>       | 5.77                         |
| P1            | -112.957                                  | 413.9188 <sup>b</sup>     | 385.0                        |
| P2            | -210.318                                  | 511.2799 <sup>b</sup>     | 487.5                        |

<sup>a</sup> Relative to TMS with calculated average GIAO magnetic shielding tensor  $^1\text{H}_{\text{cal.}} = 31.6095$  ppm,  $^{13}\text{C}_{\text{cal.}} = 186.9552$ ; <sup>b</sup> Relative to  $\text{PH}_3$  with calculated GIAO magnetic shielding tensor  $^{31}\text{P}_{\text{cal.}} = 567.0622$  ppm and experimentally observed  $^{31}\text{P}_{\text{exp.}} = -266.1$  ppm. The predicted  $^{31}\text{P}$  chemical shifts were calculated according to formular:  $^{31}\text{P}_{\text{pred. (sample)}} = ^{31}\text{P}_{\text{cal. (PH}_3)} + ^{31}\text{P}_{\text{exp. (PH}_3)} - ^{31}\text{P}_{\text{cal. (sample)}}.$ <sup>[4]</sup>

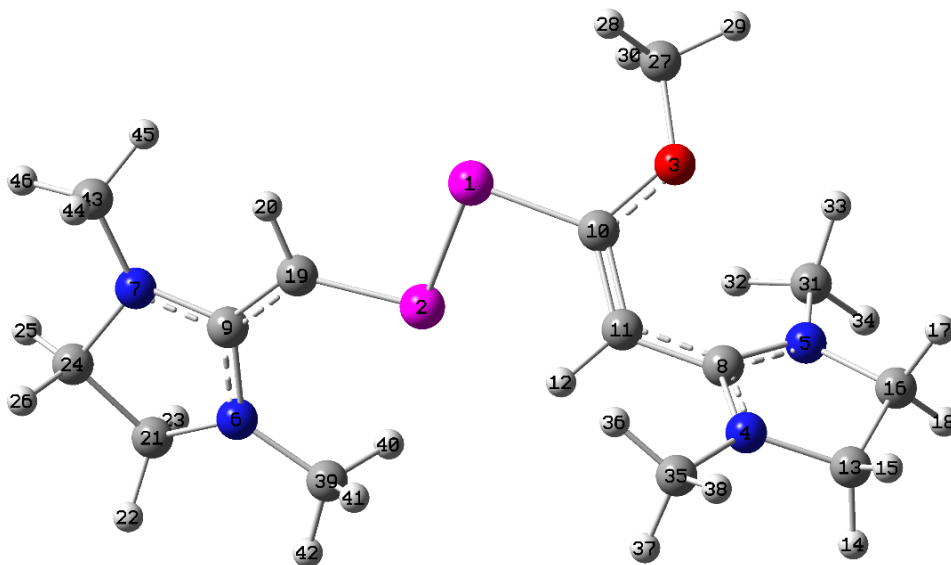

**Figure S127.** Optimized geometry of **9a<sup>M</sup>**.

**Table S3.** Calculated <sup>1</sup>H and <sup>31</sup>P NMR chemical shifts (ppm) of **9a<sup>M</sup>** at the B97-2/def2TZVP-SMD(benzene)//M062X/Def2SVP level of theory.

| Atomic number | Calculated GIAO magnetic shielding tensor | Predicted chemical shifts | Experimental chemical shifts |
|---------------|-------------------------------------------|---------------------------|------------------------------|
| H28, 29, 30   | 27.5547                                   | 4.0548                    | 2.82                         |
| H12           | 25.9258                                   | 5.6837                    | 4.85                         |
| H20           | 24.0929                                   | 7.5166                    | 6.11                         |
| C27           | 127.0909                                  | 59.8643                   | 59.6                         |
| C10           | -18.2827                                  | 205.2379                  | 195.0                        |
| C11           | 103.0425                                  | 83.9127                   | 87.9                         |
| C19           | 74.0868                                   | 112.8684                  | 103.9                        |
| P1            | 64.6911                                   | 236.2711                  | 229.7                        |
| P2            | -215.3132                                 | 516.2754                  | 471.3                        |

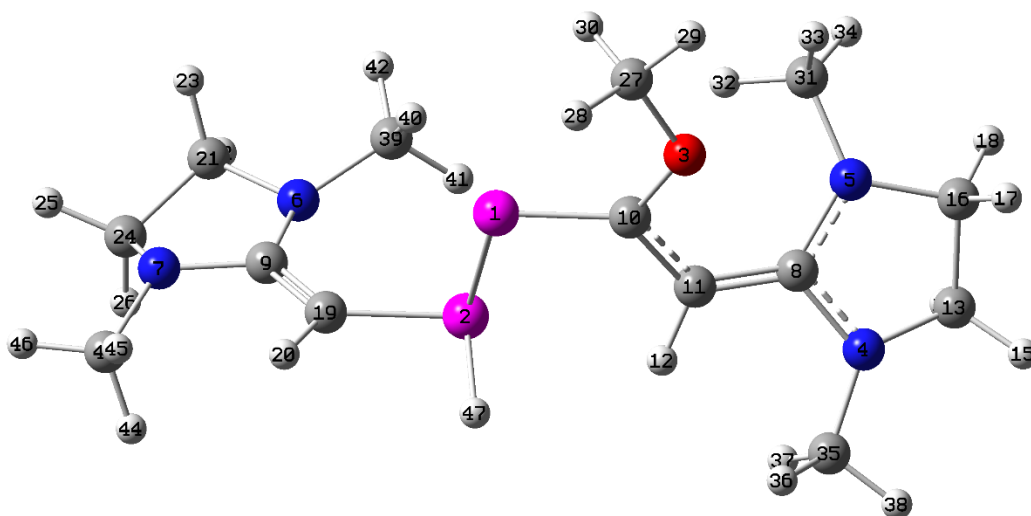

**Figure S128.** Optimized geometry of **11<sup>M</sup>**.

**Table S4.** Calculated  $^1\text{H}$  and  $^{31}\text{P}$  NMR chemical shifts (ppm) of  $\mathbf{11}^{\text{M}}$  at the B97-2/def2TZVP-SMD(benzene)//M062X/Def2SVP level of theory.

| Atomic number | Calculated GIAO magnetic shielding tensor | Predicted chemical shifts | Experimental chemical shifts |
|---------------|-------------------------------------------|---------------------------|------------------------------|
| C27           | 131.3167                                  | 55.6385                   | 55.2                         |
| C10           | -26.3173                                  | 213.2725                  | 205.3                        |
| C11           | 108.5255                                  | 78.4297                   | 82.0                         |
| C19           | 133.9734                                  | 52.9818                   | 52.5                         |
| P1            | 264.9559                                  | 36.0063                   | 49.6                         |
| P2            | 400.9159                                  | -99.9537                  | -105.9                       |

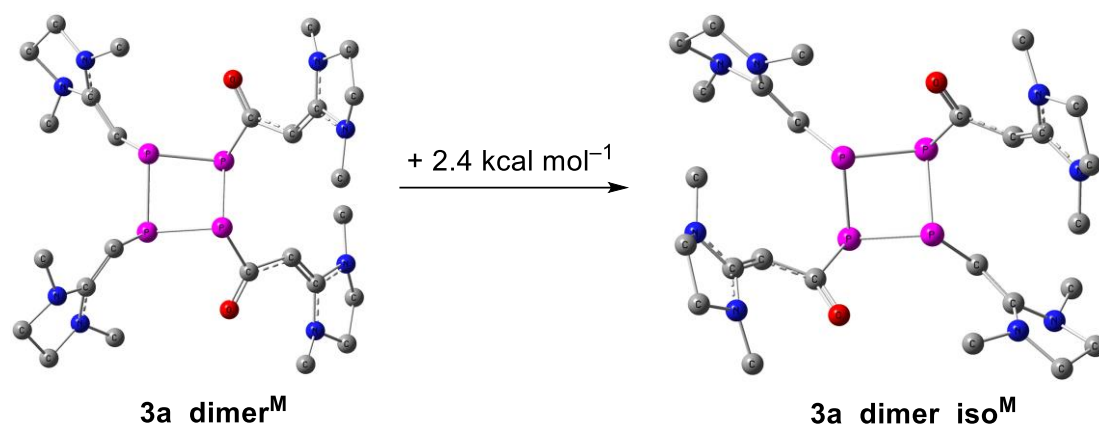

**Figure S129.** Optimized geometry of  $\mathbf{3a\_dimer}^{\text{M}}$  and its regioisomer  $\mathbf{3a\_dimer\_iso}^{\text{M}}$ , and their free energy difference calculated at the M062X/Def2-TZVP-SMD(toluene)//M062X/Def2SVP level of theory.

Cartesian Coordinates:

|           |             |             |            |           |             |             |            |
|-----------|-------------|-------------|------------|-----------|-------------|-------------|------------|
| <b>3a</b> | C           | -3.65632400 | 1.04169700 | 2.6539540 |             |             |            |
| P         | 0.19079200  | 2.05146600  | -0.6901610 | H         | -3.79001800 | 0.19690200  | 1.9668430  |
| P         | 0.95734800  | 0.27745300  | -0.0137120 | C         | -3.49125600 | -2.23257200 | -0.7366180 |
| O         | -2.31206400 | 2.65546900  | -1.1943810 | C         | -3.31021400 | -3.18419400 | 0.2858700  |
| N         | -4.17816100 | -1.02783400 | -0.4318340 | C         | -4.01207100 | 2.32403000  | 1.9164400  |
| N         | -4.58240900 | 1.13535000  | -0.1538960 | C         | 2.17192700  | -2.47910500 | 2.0813440  |
| N         | 3.77229200  | -1.48433700 | 0.5232570  | C         | -5.61769100 | -0.97050500 | -0.2251580 |
| N         | 5.06465200  | 0.29924500  | 0.2684850  | H         | -5.90482800 | -1.36301700 | 0.7676110  |
| C         | -3.59012800 | 0.21178200  | -0.3480850 | H         | -6.13948600 | -1.56335600 | -0.9895900 |
| C         | 3.74981000  | -0.13563700 | 0.2774930  | C         | -4.71233600 | 4.74488700  | 0.6777590  |
| C         | -4.43830200 | 2.35421800  | 0.5744870  | H         | -4.97537700 | 5.69063100  | 0.2004340  |
| C         | -1.66423500 | 1.70619600  | -0.7765310 | C         | 5.45845600  | 1.49847600  | -0.3996520 |
| C         | -3.03487300 | -2.46474400 | -2.0503870 | C         | 5.34353900  | 1.58821000  | -1.7998060 |
| C         | 2.63703600  | -2.31021800 | 0.7682490  | C         | -3.93374400 | 3.53816000  | 2.6086270  |
| C         | -2.23182900 | 0.42425700  | -0.4193360 | H         | -3.59924000 | 3.53735200  | 3.6484150  |
| H         | -1.58963200 | -0.45170000 | -0.3276430 | C         | -5.89796500 | 0.53297000  | -0.3564350 |

|   |             |             |            |   |             |             |            |
|---|-------------|-------------|------------|---|-------------|-------------|------------|
| H | -6.29442000 | 0.78288100  | -1.3555040 | C | -2.46580100 | -2.83975300 | 2.6268430  |
| H | -6.60429300 | 0.90274400  | 0.3984860  | H | -2.00202800 | -3.83484900 | 2.7148220  |
| C | 2.01633200  | -2.93415400 | -0.3326670 | H | -2.74403800 | -2.50868800 | 3.6394520  |
| C | -4.77600600 | 3.56393300  | -0.0622660 | H | -1.70868100 | -2.14842900 | 2.2260100  |
| C | 2.67727700  | 0.69858000  | 0.0472960  | C | 6.05011300  | 2.41906100  | 1.8892620  |
| H | 2.96266700  | 1.73181100  | -0.1709210 | H | 6.33683800  | 1.37759000  | 2.1046950  |
| C | -2.41381000 | -3.68786500 | -2.3226540 | C | 3.32425000  | -2.52798400 | 4.3311050  |
| H | -2.04979200 | -3.88811400 | -3.3332210 | H | 2.56834900  | -3.19381100 | 4.7747370  |
| C | 6.36080600  | 3.72513000  | -0.2797930 | H | 3.73736800  | -1.90614500 | 5.1388650  |
| H | 6.76339100  | 4.56088700  | 0.2928270  | H | 4.13125700  | -3.16039300 | 3.9322970  |
| C | -5.19126300 | 3.59356700  | -1.5210640 | C | -1.87119700 | -0.96535300 | -3.7108530 |
| H | -4.89827000 | 2.62464600  | -1.9496670 | H | -1.24688700 | -0.54155400 | -2.9105270 |
| C | 2.44039900  | -2.58556100 | -1.7512640 | H | -2.02631700 | -0.18426900 | -4.4694120 |
| H | 2.64851000  | -1.50273500 | -1.7543790 | H | -1.31828300 | -1.79152100 | -4.1856480 |
| C | -4.28979200 | 4.73713400  | 2.0039340  | C | -4.59478000 | 0.80399100  | 3.8419290  |
| H | -4.23104500 | 5.67093800  | 2.5652930  | H | -4.48563000 | 1.59133400  | 4.6030130  |
| C | 1.12614800  | -3.38398100 | 2.2947480  | H | -4.36769800 | -0.16018400 | 4.3230820  |
| H | 0.74858600  | -3.54233200 | 3.3078720  | H | -5.64755600 | 0.79159800  | 3.5222590  |
| C | 5.73296200  | 2.78418500  | -2.4123500 | C | 4.82409700  | 0.44173200  | -2.6554550 |
| H | 5.64242900  | 2.88563500  | -3.4960010 | H | 4.59559800  | -0.40968700 | -1.9977420 |
| C | 5.10520800  | -1.92109400 | 0.9199560  | C | -4.09989600 | -2.01238900 | -4.2828960 |
| H | 5.31871500  | -2.92616600 | 0.5320710  | H | -3.62161300 | -2.87681200 | -4.7684200 |
| H | 5.20553800  | -1.94660300 | 2.0203470  | H | -4.27453900 | -1.24874500 | -5.0549080 |
| C | -3.70218800 | -2.88826800 | 1.7239500  | H | -5.07522200 | -2.34221200 | -3.8959680 |
| H | -4.14673000 | -1.88488000 | 1.7464780  | C | -2.18857400 | 1.03861900  | 3.0936150  |
| C | 0.96464900  | -3.81233800 | -0.0761860 | H | -1.51855400 | 1.16699800  | 2.2307590  |
| H | 0.44484400  | -4.29772000 | -0.9017200 | H | -1.93761000 | 0.08768400  | 3.5878850  |
| C | 5.97313400  | 2.55479200  | 0.3766460  | H | -1.99028600 | 1.85199900  | 3.8087430  |
| C | 6.23440200  | 3.84168400  | -1.6624560 | C | -6.70878700 | 3.77097700  | -1.6525970 |
| H | 6.53272500  | 4.76656400  | -2.1584690 | H | -7.26298700 | 2.99265100  | -1.1070790 |
| C | -2.27576700 | -4.66097700 | -1.3362180 | H | -7.01612300 | 3.73809300  | -2.7089150 |
| H | -1.81340500 | -5.62022000 | -1.5774590 | H | -7.01817400 | 4.74443200  | -1.2406800 |
| C | 0.54383200  | -4.05800600 | 1.2293950  | C | -4.74326900 | -3.87878900 | 2.2507780  |
| H | -0.27209500 | -4.75959900 | 1.4066540  | H | -5.64217500 | -3.89013200 | 1.6169550  |
| C | 5.98047000  | -0.83454700 | 0.3040340  | H | -5.04490000 | -3.61355200 | 3.2749250  |
| H | 6.87304900  | -0.60673900 | 0.9030580  | H | -4.33909200 | -4.90247200 | 2.2760430  |
| H | 6.30663500  | -1.10640900 | -0.7176580 | C | -4.44334400 | 4.67210500  | -2.3077530 |
| C | -3.21830400 | -1.44725700 | -3.1640860 | H | -4.73228200 | 5.68386500  | -1.9837750 |
| H | -3.73136000 | -0.57206800 | -2.7431340 | H | -4.68419800 | 4.59069100  | -3.3784610 |
| C | -2.72108100 | -4.40840200 | -0.0422330 | H | -3.36150200 | 4.54563200  | -2.1766870 |
| H | -2.60109800 | -5.17054100 | 0.7317800  | C | 1.59800200  | -0.75420000 | 3.8027980  |
| C | 2.70568300  | -1.65168500 | 3.2385350  | H | 1.16795500  | -0.12045700 | 3.0133740  |
| H | 3.48783600  | -0.98292300 | 2.8493730  | H | 1.99684600  | -0.10191400 | 4.5938400  |

H 0.78387700 -1.35555600 4.2365580  
 C 5.89267000 -0.02505300 -3.6504940  
 H 6.13781900 0.76988700 -4.3709030  
 H 5.53173100 -0.89342300 -4.2214610  
 H 6.82357000 -0.30965500 -3.1378910  
 C 3.72697700 -3.30656700 -2.1652490  
 H 4.56008300 -3.06618800 -1.4897990  
 H 4.02179300 -3.00986200 -3.1835620  
 H 3.58129400 -4.39771300 -2.1552010  
 C 3.52461800 0.81421000 -3.3774080  
 H 2.74091600 1.11612400 -2.6678190  
 H 3.15179500 -0.04716800 -3.9533360  
 H 3.68883100 1.64275800 -4.0834560  
 C 4.67076800 2.65229700 2.5192040  
 H 4.32578600 3.67644700 2.3096790  
 H 4.71922600 2.52376900 3.6111850  
 H 3.92106700 1.95506400 2.1199880  
 C 1.32919000 -2.82852900 -2.7705070  
 H 1.14409900 -3.90374400 -2.9230510  
 H 1.61144600 -2.40166100 -3.7441070  
 H 0.38766000 -2.35956000 -2.4487640  
 C 7.09414500 3.33357700 2.5271640  
 H 8.07777000 3.22786600 2.0470250  
 H 7.20292500 3.09067300 3.5937070  
 H 6.79401000 4.39045400 2.4647870

**2b<sup>M</sup>**

P 0.35449000 -0.82223600 0.0437880  
 N -2.32254200 -1.63380100 -1.3475120  
 N -3.54327900 0.01065600 -0.4324410  
 C -2.24897200 -0.42783800 -0.6818800  
 C -1.09223000 0.21725000 -0.2691920  
 C -3.70271300 -1.95336600 -1.6669320  
 H -3.91500600 -3.02478800 -1.5425300  
 H -3.92599000 -1.67570800 -2.7146770  
 C -4.47039700 -1.08388300 -0.6883100  
 H -5.42610500 -0.72209800 -1.0925980  
 H -4.67473600 -1.63641300 0.2482600  
 C -1.29904900 -2.12849300 -2.2450120  
 H -0.63337700 -1.30784700 -2.5494960  
 H -0.68206800 -2.91121000 -1.7817680  
 H -1.78915100 -2.54088900 -3.1401940  
 C -3.84653100 0.82281400 0.7357140

H -3.25762700 0.49448000 1.6089890  
 H -3.64557500 1.88711400 0.5628690  
 H -4.91519100 0.70886800 0.9597600  
 C 1.68972300 0.36173600 0.0979430  
 C 3.00050500 0.09199500 -0.1912040  
 H 1.44923200 1.41033800 0.2630190  
 N 3.61082800 -1.12563200 -0.4106980  
 N 3.96767900 1.07827400 -0.3358400  
 C 5.03702200 -0.93862000 -0.6128090  
 C 3.14022000 -2.37209500 0.1597680  
 C 5.10482000 0.51978900 -1.0420060  
 C 3.59339300 2.44745900 -0.5831420  
 H 5.43318300 -1.62595200 -1.3737510  
 H 5.59486500 -1.10106400 0.3295740  
 H 2.59183600 -2.19181000 1.0970900  
 H 2.47872400 -2.92269500 -0.5240520  
 H 4.01117300 -3.00397100 0.3865270  
 H 6.04296500 1.01193900 -0.7498530  
 H 4.98441600 0.61419000 -2.1397040  
 H 2.98067500 2.55769700 -1.4974640  
 H 3.02035400 2.84980100 0.2630300  
 H 4.50623000 3.04814900 -0.6871040  
 P 0.01267500 -1.27111000 2.3420630  
 C -0.44351000 -2.81785200 1.9123630  
 O -0.75883000 -3.89401200 1.6219960  
 C -1.13066700 1.66311900 0.0497720  
 C -0.66837000 2.18856400 1.2688540  
 C -1.62769700 2.57190700 -0.9010560  
 C -0.71937000 3.55572700 1.5317820  
 H -0.27582800 1.50817600 2.0277030  
 C -1.69181000 3.93812100 -0.6356650  
 H -1.97820600 2.18377900 -1.8599260  
 C -1.23592000 4.43970800 0.5836020  
 H -0.36093900 3.93225600 2.4916620  
 H -2.09117900 4.61743900 -1.3912200  
 H -1.27899200 5.50976500 0.7920030

**TS1-b**

P 0.04316200 -1.09001900 0.6509810  
 N -2.73558400 -2.21354700 -0.4093490  
 N -3.87562600 -0.28220800 -0.2361530  
 C -2.60302900 -0.85140200 -0.1676470  
 C -1.44087700 -0.16618400 0.1108920

C -4.11553500 -2.52852900 -0.7366710  
 H -4.43237000 -3.48948200 -0.3060050  
 H -4.25048100 -2.58017600 -1.8343860  
 C -4.86371600 -1.34653800 -0.1539460  
 H -5.77589700 -1.09629300 -0.7134570  
 H -5.14284300 -1.53904400 0.9006590  
 C -1.71681200 -2.99893200 -1.0782300  
 H -1.03002900 -2.34319300 -1.6359000  
 H -1.11681900 -3.59577900 -0.3781100  
 H -2.21102400 -3.67783900 -1.7901060  
 C -4.20399700 0.92547900 0.4977230  
 H -3.78551600 0.90417100 1.5197230  
 H -3.83362100 1.82640600 -0.0054780  
 H -5.29791600 0.99671100 0.5612770  
 C 1.37532900 -0.05402400 -0.0941290  
 C 2.62943800 -0.42197600 -0.5682860  
 H 1.04252700 0.93263000 -0.4225770  
 N 3.25357700 -1.64079300 -0.5282620  
 N 3.52495400 0.50437500 -1.0088750  
 C 4.68988000 -1.44853000 -0.6768960  
 C 2.76362500 -2.77231200 0.2308250  
 C 4.75572600 -0.12877200 -1.4403770  
 C 3.18246100 1.86895600 -1.3230090  
 H 5.14819700 -2.28455000 -1.2221880  
 H 5.17611900 -1.35827100 0.3125750  
 H 2.60415100 -2.52009100 1.2943390  
 H 1.81406000 -3.13440300 -0.1797780  
 H 3.50611700 -3.57733300 0.1570660  
 H 5.63142900 0.47641400 -1.1696270  
 H 4.76364400 -0.29333300 -2.5342700  
 H 2.49692300 1.94206700 -2.1850270  
 H 2.71489700 2.35049000 -0.4533250  
 H 4.10589200 2.41250100 -1.5578000  
 P 0.64227300 -0.28055000 2.6573880  
 C 1.94104300 0.52097100 1.8189970  
 O 2.93012100 1.15030700 1.8541250  
 C -1.37049800 1.30306100 -0.1063620  
 C -1.11942200 2.22579900 0.9232520  
 C -1.49971000 1.80273200 -1.4144880  
 C -1.00550000 3.58922100 0.6522600  
 H -1.02548400 1.86495700 1.9473430  
 C -1.40223100 3.16667900 -1.6845580  
 H -1.68475500 1.09485700 -2.2256070

C -1.14830100 4.06795100 -0.6501440  
 H -0.81442500 4.28507700 1.4712770  
 H -1.51818700 3.52674700 -2.7087030  
 H -1.06555600 5.13617200 -0.8572060

**IN1-b**

P 0.01839700 -1.07506500 0.8291950  
 N -2.71045100 -2.23198900 -0.3872320  
 N -3.84666400 -0.28858300 -0.3386950  
 C -2.58114000 -0.86156700 -0.1770870  
 C -1.43749200 -0.17337900 0.1560120  
 C -4.06481900 -2.54031600 -0.8120060  
 H -4.41860500 -3.49492000 -0.3962590  
 H -4.12337300 -2.60007000 -1.9164730  
 C -4.84207600 -1.34781000 -0.2947940  
 H -5.71912900 -1.10507000 -0.9110760  
 H -5.18280200 -1.52270400 0.7448390  
 C -1.65457500 -3.04004700 -0.9637150  
 H -0.96260700 -2.41277500 -1.5485100  
 H -1.06331400 -3.56580300 -0.2024980  
 H -2.11220000 -3.78271000 -1.6345690  
 C -4.21466000 0.93116100 0.3557140  
 H -3.85895400 0.92440300 1.4014320  
 H -3.81162200 1.82391900 -0.1368800  
 H -5.31025500 1.00639900 0.3516000  
 C 1.41661000 0.03090900 0.2031530  
 C 2.60254200 -0.42295500 -0.5098320  
 H 0.99355600 0.90335000 -0.3091710  
 N 3.25269600 -1.56859200 -0.3169070  
 N 3.30244700 0.39506500 -1.3046900  
 C 4.46611200 -1.61027600 -1.1276060  
 C 2.84541600 -2.67664800 0.5271200  
 C 4.64602700 -0.13825800 -1.5125100  
 C 3.03485300 1.82149700 -1.4216750  
 H 4.31524800 -2.25623000 -2.0088680  
 H 5.30649600 -2.00618700 -0.5429500  
 H 2.35755500 -2.29219700 1.4336270  
 H 2.15820100 -3.35869400 0.0064880  
 H 3.75144300 -3.22274000 0.8199640  
 H 5.35151800 0.37855700 -0.8405190  
 H 4.97391800 -0.00208600 -2.5510800  
 H 2.02831200 1.99204700 -1.8260320  
 H 3.12476700 2.30339700 -0.4371500

H 3.76399300 2.24566600 -2.1221480  
P 0.69959100 -0.14437600 2.7546180  
C 1.92285800 0.52172800 1.6366940  
O 2.96795200 1.13847800 1.7461470  
C -1.35313000 1.29148100 -0.0720950  
C -1.14030400 2.22084600 0.9607620  
C -1.40565600 1.77903000 -1.3915890  
C -0.98198300 3.57810700 0.6796630  
H -1.10187200 1.86777800 1.9910260  
C -1.26662900 3.13770700 -1.6708180  
H -1.56734300 1.06537600 -2.2031440  
C -1.04532800 4.04491800 -0.6330900  
H -0.81665400 4.27889800 1.4999550  
H -1.32662500 3.48925800 -2.7029300  
H -0.92906000 5.10885800 -0.8461860

**TS2-b**

P 0.14665500 -0.39830300 -0.9888670  
N -0.79891100 2.51149800 -0.3788260  
N -2.96552600 2.03135200 -0.5315310  
C -1.71160000 1.49349100 -0.3993550  
C -1.42966600 0.11483700 -0.3282550  
C -1.46100200 3.80477700 -0.4213320  
H -0.96075800 4.50035700 -1.1103640  
H -1.45717700 4.25953300 0.5863340  
C -2.87239800 3.44410000 -0.8700950  
H -3.64645700 4.03711800 -0.3634920  
H -2.99234600 3.57938900 -1.9604220  
C 0.52178200 2.43457100 0.2094040  
H 0.59487200 1.55216800 0.8584480  
H 1.31306500 2.35179800 -0.5495390  
H 0.69127600 3.33907700 0.8152890  
C -4.09339800 1.27668600 -1.0499440  
H -3.76284000 0.56246100 -1.8195420  
H -4.60681300 0.71355900 -0.2595590  
H -4.80259300 1.98563900 -1.4967080  
C 1.90011800 -1.07389000 0.4269670  
C 2.98805400 -0.19447600 0.4750650  
H 1.27424700 -1.11296000 1.3187740  
N 3.90795000 -0.01411200 -0.4954820  
N 3.19690600 0.74195000 1.4663450  
C 4.76031300 1.12490800 -0.2018310  
C 3.87159400 -0.61786900 -1.8126030

C 4.51968200 1.32350500 1.2927250  
C 2.69422400 0.55209000 2.8065980  
H 4.44211600 2.00693300 -0.7878280  
H 5.81185600 0.91292200 -0.4389780  
H 2.83487800 -0.67542800 -2.1762770  
H 4.45747200 0.01292900 -2.4935280  
H 4.27142700 -1.64116500 -1.7893160  
H 5.26783400 0.77078500 1.8921970  
H 4.53953100 2.37885300 1.5976410  
H 1.60865500 0.39200000 2.7896240  
H 3.16813400 -0.30638600 3.3153900  
H 2.89073800 1.46288100 3.3874010  
P 0.21953700 -2.54103000 -1.1529870  
C 1.88906200 -2.31922500 -0.4316010  
O 2.87044400 -3.03626600 -0.5461250  
C -2.45287000 -0.77882500 0.2653430  
C -2.89493400 -1.94709100 -0.3744330  
C -3.00209000 -0.47284400 1.5234260  
C -3.85163500 -2.77100500 0.2166820  
H -2.49752000 -2.19766400 -1.3588870  
C -3.96634800 -1.28793200 2.1104070  
H -2.66339200 0.42779700 2.0421990  
C -4.39473300 -2.44548300 1.4583080  
H -4.17692200 -3.67380800 -0.3028250  
H -4.37869300 -1.02469400 3.0863240  
H -5.14489100 -3.09073300 1.9180610

**3b<sup>M</sup>**

P -0.26916000 0.23554900 -0.2069620  
N -2.24491200 2.66863300 0.0443350  
N -4.08650600 1.51074500 -0.4743060  
C -2.75019400 1.40018200 -0.1329480  
C -2.04808700 0.20020300 -0.0100550  
C -3.29989500 3.65953400 -0.0866950  
H -2.95929200 4.55304000 -0.6289900  
H -3.64905200 3.97559700 0.9143770  
C -4.37705100 2.89173100 -0.8315540  
H -5.39471000 3.18147100 -0.5354600  
H -4.27932100 3.03258000 -1.9248150  
C -1.13249400 2.99525600 0.9148630  
H -0.96550000 2.18421800 1.6383810  
H -0.19762400 3.15313100 0.3606980  
H -1.38079400 3.91498400 1.4661960



C -4.78055900 0.49316700 -1.2447000  
 H -4.14686600 0.10602800 -2.0602940  
 H -5.09373300 -0.35251100 -0.6209680  
 H -5.67843600 0.95306600 -1.6775080  
 C 2.90218700 -0.31438600 0.3607540  
 C 4.22189300 0.04983400 0.1720940  
 H 2.41104900 0.04107100 1.2625380  
 N 4.98416000 -0.10551000 -0.9480900  
 N 4.98986500 0.66597900 1.1438800  
 C 6.31076800 0.45134700 -0.7377220  
 C 4.44818500 -0.14019600 -2.2949230  
 C 6.39077200 0.53506400 0.7810720  
 C 4.62588400 0.58474700 2.5371630  
 H 6.38263300 1.45421400 -1.1990060  
 H 7.09430900 -0.18517000 -1.1723620  
 H 3.42313600 0.25370500 -2.2958290  
 H 5.07755200 0.50121100 -2.9307360  
 H 4.41272800 -1.15814900 -2.6990730  
 H 6.82246200 -0.39145600 1.2068490  
 H 6.98305000 1.39025100 1.1351420  
 H 3.66329700 1.08133000 2.7141110  
 H 4.54964700 -0.46011800 2.8896020  
 H 5.38677400 1.10984300 3.1289350  
 P 0.38576300 -1.68395300 0.0024490  
 C 2.20138000 -1.30131400 -0.4335670  
 O 2.69358600 -1.99624500 -1.3066090  
 C -2.81148600 -1.04889700 0.2583420  
 C -2.79790200 -2.13901400 -0.6251780  
 C -3.57929700 -1.15565900 1.4270640  
 C -3.54747000 -3.28210000 -0.3624900  
 H -2.19618000 -2.07600200 -1.5338600  
 C -4.33581600 -2.29727700 1.6904870  
 H -3.58802300 -0.31858900 2.1287430  
 C -4.32436700 -3.36495500 0.7945200  
 H -3.52728700 -4.11465100 -1.0677400  
 H -4.93205800 -2.35456100 2.6029730  
 H -4.91246700 -4.26105500 0.9987500

**TS1-c**

P 0.17720600 -1.39960200 0.5822040  
 N -2.82383100 -1.54771500 -0.8368130  
 N -3.17445400 0.63836200 -0.9814460  
 C -2.25232700 -0.32038400 -0.6267590

C -1.04418300 -0.04940800 0.0369740  
 C -4.10540900 -1.40993700 -1.5059290  
 H -4.82912200 -2.14574000 -1.1296880  
 H -3.99594700 -1.55066500 -2.5980150  
 C -4.47974500 0.01833600 -1.1610400  
 H -5.05232300 0.51877200 -1.9536800  
 H -5.05495800 0.06402300 -0.2181330  
 C -2.15600200 -2.83104500 -0.8800360  
 H -1.30078800 -2.83650400 -1.5719740  
 H -1.80158000 -3.12939300 0.1157910  
 H -2.89230600 -3.57059700 -1.2205890  
 C -3.16723800 2.03679400 -0.5753280  
 H -2.98936500 2.14718600 0.5020830  
 H -2.41955800 2.61880400 -1.1268060  
 H -4.15932400 2.44356200 -0.8101480  
 C 1.69959600 -0.48177000 0.8317220  
 C 2.87247700 -0.63208900 0.1468730  
 H 1.67557800 0.34744400 1.5389500  
 N 3.23137200 -1.57412500 -0.8060710  
 N 3.96041500 0.21860500 0.3182850  
 C 4.64920400 -1.44472600 -1.0984240  
 C 2.64274300 -2.89232500 -0.8670670  
 C 4.89524100 0.01780000 -0.7706730  
 C 3.76654800 1.55283100 0.8312440  
 H 4.86584900 -1.69532400 -2.1463880  
 H 5.25762100 -2.10028200 -0.4449330  
 H 2.57191000 -3.35861700 0.1319460  
 H 1.63036900 -2.86408200 -1.2898860  
 H 3.27356900 -3.52002300 -1.5109550  
 H 5.92916000 0.22336600 -0.4597830  
 H 4.65141700 0.66130800 -1.6398830  
 H 3.01513500 2.11847800 0.2483530  
 H 3.43661300 1.52273300 1.8786980  
 H 4.72737100 2.08325200 0.7993790  
 P -0.77966300 -1.36708800 2.5994810  
 C -1.94992300 -0.27238800 1.9362760  
 O -2.95227300 0.32837300 2.0557170  
 C -0.42287800 1.29891600 -0.1213020  
 C -0.21072400 2.16700500 0.9603420  
 C 0.03129900 1.70275100 -1.3857300  
 C 0.39208400 3.40960300 0.7749010  
 H -0.53711300 1.86691800 1.9582580  
 C 0.63406400 2.94584200 -1.5754270

H -0.10367200 1.02637200 -2.2329450  
C 0.81020400 3.81008600 -0.4949530  
H 0.53079500 4.07352900 1.6301170  
H 0.96630700 3.24080200 -2.5725720  
H 1.27472100 4.78680700 -0.6398730

**IN1-c**

P 0.19190100 -1.76668500 0.6467640  
N 3.14494600 -0.31490300 1.1983930  
N 3.02165500 1.22352900 -0.3649790  
C 2.37660500 0.20719000 0.2297500  
C 1.03567200 -0.22995700 -0.2457280  
C 4.48539600 0.26869200 1.1512600  
H 5.17447800 -0.43957100 0.6605040  
H 4.85347700 0.47299100 2.1645190  
C 4.26762800 1.52813400 0.3225130  
H 4.14239700 2.42917300 0.9485010  
H 5.07352500 1.71504700 -0.3989180  
C 2.97492200 -1.55091300 1.9487440  
H 2.06817000 -1.52049600 2.5589660  
H 2.91158300 -2.41043900 1.2621290  
H 3.85029500 -1.65388400 2.6014340  
C 2.55700100 2.10770400 -1.4206880  
H 1.89356800 1.55794700 -2.0923460  
H 2.05184900 2.99360400 -1.0039140  
H 3.43918400 2.42295200 -1.9938480  
C -1.47622700 -1.65532700 -0.0407080  
C -2.54195600 -0.90341200 0.3642410  
H -1.61572700 -2.21286100 -0.9667820  
N -2.64271000 -0.00635900 1.4175750  
N -3.75735200 -0.87087900 -0.3139280  
C -3.99796600 0.49873200 1.5137980  
C -1.90405400 -0.13417400 2.6449200  
C -4.51380400 0.29562100 0.0972660  
C -3.85924500 -1.33150800 -1.6729650  
H -4.00345900 1.55352700 1.8277090  
H -4.59391900 -0.08843900 2.2408760  
H -2.26208800 -0.97793500 3.2657440  
H -0.83677900 -0.29206700 2.4457420  
H -2.01337200 0.79818800 3.2183440  
H -5.59627200 0.10649200 0.0570810  
H -4.28251800 1.17561300 -0.5334490  
H -3.18242300 -0.78292000 -2.3558460

H -3.61688000 -2.40082100 -1.7369700  
H -4.89475600 -1.19975100 -2.0133500  
P 1.23975600 -2.78503900 -1.0487950  
C 1.37737100 -1.07908200 -1.5656550  
O 1.69836500 -0.53627400 -2.6067350  
C 0.09411200 0.93585600 -0.3637340  
C -0.78117300 1.05569200 -1.4504610  
C 0.00961100 1.87577700 0.6720460  
C -1.71898900 2.08537700 -1.4894610  
H -0.70602300 0.33896300 -2.2693280  
C -0.92715900 2.90706700 0.6336370  
H 0.67855400 1.78534400 1.5344030  
C -1.80012000 3.01237400 -0.4484530  
H -2.39165200 2.16817500 -2.3458600  
H -0.97881600 3.62650200 1.4531600  
H -2.53568900 3.81796300 -0.4855150

**TS2-c**

P -0.10896500 -1.40285300 -1.1120850  
N 3.18608300 -1.08626500 0.5384290  
N 2.61585000 0.68829600 1.7225520  
C 2.39408500 0.01532600 0.5559070  
C 1.46201000 0.34978500 -0.4646640  
C 4.15715300 -1.04112300 1.6178360  
H 5.12705300 -0.65813800 1.2507940  
H 4.31545900 -2.04260800 2.0399390  
C 3.48920400 -0.07944200 2.5980410  
H 2.90911600 -0.61827600 3.3674410  
H 4.20435800 0.58136500 3.1052980  
C 3.41409800 -1.98187400 -0.5735430  
H 2.48542100 -2.14529800 -1.1306500  
H 4.15291900 -1.56000700 -1.2744220  
H 3.76518700 -2.94308900 -0.1748740  
C 2.35189100 2.08566300 1.9844930  
H 2.14992700 2.61091300 1.0454910  
H 1.49036400 2.23593300 2.6535240  
H 3.24592700 2.52765300 2.4493400  
C -1.79151900 -0.92131000 -1.1814400  
C -2.70976200 -1.00509400 -0.1369020  
H -2.08733600 -0.26513200 -2.0020120  
N -2.60704000 -1.69991400 1.0352980  
N -3.89774900 -0.32344600 -0.1289580  
C -3.84009900 -1.58433000 1.7986180

C -1.72299300 -2.82483400 1.2489830  
 C -4.45792700 -0.32107400 1.2100870  
 C -4.17442200 0.75840100 -1.0461850  
 H -3.64038300 -1.50046400 2.8757120  
 H -4.48797100 -2.46482400 1.6295230  
 H -0.70966200 -2.50336800 1.5274780  
 H -2.13921500 -3.44040800 2.0581330  
 H -1.63624900 -3.43702900 0.3379140  
 H -5.55595400 -0.35033700 1.1892690  
 H -4.13793000 0.57928000 1.7676940  
 H -3.41669600 1.55776100 -0.9778870  
 H -4.20590000 0.38710600 -2.0792820  
 H -5.16215400 1.17102800 -0.8049000  
 P 0.70880500 -0.65208400 -2.9576160  
 C 1.96422500 0.13987100 -1.8912410  
 O 3.09252800 0.49991600 -2.1958870  
 C 0.39851700 1.34528500 -0.1878510  
 C 0.07285500 2.34854000 -1.1143580  
 C -0.37585800 1.26706700 0.9867230  
 C -0.95442000 3.25695400 -0.8563660  
 H 0.64155500 2.41447900 -2.0431310  
 C -1.38726900 2.18438100 1.2528210  
 H -0.17874200 0.45631200 1.6946920  
 C -1.68007700 3.19492900 0.3335140  
 H -1.17807100 4.03260700 -1.5912410  
 H -1.95576300 2.10752800 2.1829020  
 H -2.47124500 3.91832900 0.5378060

**3c<sup>M</sup>**

P 0.30322600 -0.87947200 -2.0943420  
 P 1.19212300 -0.55639600 -0.2888790  
 O -1.98916000 -2.17638600 -1.8021220  
 N -3.40608500 -1.87755300 0.7008140  
 N -4.20371300 0.20104500 0.6935850  
 N 3.96824100 -0.04831800 1.5069230  
 N 5.29414200 -0.27550900 -0.2664630  
 C -3.18802600 -0.61460700 0.2464200  
 C 3.97437300 -0.28786100 0.1510760  
 C -1.45728900 -1.14549900 -1.4210060  
 C -2.09314800 -0.18835900 -0.5173320  
 C -4.56157300 -1.92417500 1.5790090  
 H -4.23171400 -1.97079900 2.6332480  
 H -5.19289800 -2.80202100 1.3803520

C -5.26763000 -0.60906800 1.2692560  
 H -6.07440000 -0.75624000 0.5279370  
 H -5.70390900 -0.13888400 2.1618810  
 C 2.91562500 -0.50918300 -0.7035230  
 H 3.19466600 -0.68025400 -1.7448070  
 C 5.30187500 0.32491200 1.9476360  
 H 5.50490200 -0.04544100 2.9618560  
 H 5.43322500 1.42409800 1.9392440  
 C 6.17031600 -0.33489900 0.8872360  
 H 7.11188000 0.20148800 0.7056340  
 H 6.40634700 -1.38153300 1.1632910  
 C -4.57563900 1.42552900 0.0085790  
 H -4.34188600 1.35669800 -1.0643570  
 H -5.65720400 1.57489300 0.1289420  
 H -4.05188600 2.30197100 0.4146150  
 C -2.38599900 -2.89435800 0.8173910  
 H -1.39281300 -2.42098700 0.8492860  
 H -2.55064700 -3.44676300 1.7538990  
 H -2.39927300 -3.58094400 -0.0391890  
 C 2.82001700 0.43192200 2.2418400  
 H 2.33161900 1.28410400 1.7371860  
 H 2.06623500 -0.35563100 2.3690070  
 H 3.16101700 0.75180900 3.2352600  
 C 5.70563000 -0.87172400 -1.5113130  
 H 5.46799400 -1.95009900 -1.5621700  
 H 5.22113800 -0.36928100 -2.3591020  
 H 6.78980700 -0.74022400 -1.6199110  
 C -1.65757700 1.22542800 -0.4353810  
 C -1.40224800 1.98863800 -1.5862200  
 C -1.46687500 1.84245100 0.8115730  
 C -0.96778100 3.30839300 -1.4954140  
 H -1.54928200 1.53060900 -2.5668310  
 C -1.04780200 3.16822100 0.9066110  
 H -1.64523000 1.25961000 1.7183790  
 C -0.79071900 3.90797000 -0.2478580  
 H -0.77244000 3.87609000 -2.4068940  
 H -0.90882800 3.62326800 1.8893800  
 H -0.45464700 4.94355400 -0.1763290

**A**

P 0.07898991 0.84662693 0.00000866  
 P 1.61084344 -0.47526019 -0.00001295  
 O -2.43084375 -0.20594878 -0.00003611

C -1.26910284 -0.48344037 0.00004324  
H 2.62630588 0.52601023 0.00000429  
H -0.91243916 -1.54827888 0.00008952

## B

O 2.06332914 -2.56834011 -0.19767495  
N 3.69150373 1.27662453 -0.82876916  
N 4.07639759 -0.40833009 0.55412653  
N -3.31815493 1.13701576 0.58223472  
N -4.83381525 -0.35452262 -0.12916910  
C 3.12341473 0.16287683 -0.23749392  
C -3.47536044 -0.14822675 0.08784731  
C 1.32401606 -1.59170742 -0.29332991  
C 1.81307269 -0.22178544 -0.42363943  
H 1.15358903 0.50715487 -0.88946368  
C 4.93767526 1.61229710 -0.17164496  
H 4.78679853 2.34239758 0.64861471  
H 5.66212819 2.03244358 -0.88323377  
C 5.35792547 0.24605625 0.37075310  
H 5.99280100 -0.29315503 -0.35531508  
H 5.90090223 0.31203501 1.32371696  
C -2.50552827 -1.07610878 -0.17528188  
H -2.84183001 -2.06193877 -0.49530126  
C -4.61975822 1.76359733 0.74460419  
H -4.59703601 2.82962197 0.47623306  
H -4.97113234 1.67439862 1.79074678  
C -5.48917137 0.93836989 -0.19204344  
H -6.53634489 0.87680000 0.13526349  
H -5.46502570 1.35315199 -1.21974982  
C -1.08182936 -0.85606085 -0.13383487  
H -0.72889335 0.16223447 0.04615277  
C -0.14343804 -1.80777815 -0.33267452  
H -0.43272764 -2.85256682 -0.47880728  
C -2.26289652 1.50301842 1.50337863  
H -1.84636395 0.60928330 1.99044129  
H -1.43979188 2.04593841 1.01359995  
H -2.68120577 2.15773774 2.28238145  
C -5.27960217 -1.39431882 -1.02079702  
H -4.86021309 -1.28441864 -2.03884899  
H -4.99426792 -2.38147646 -0.63385640  
H -6.37534784 -1.36331221 -1.07882785  
C 2.92424628 2.26109559 -1.53577657  
H 3.60905594 2.93211888 -2.07152124

H 2.28007645 1.76822281 -2.27668849  
H 2.28508414 2.87112814 -0.86896511  
C 3.86111681 -1.42631925 1.55130498  
H 2.83629111 -1.33955813 1.93575584  
H 3.97421877 -2.44387971 1.15503535  
H 4.56778642 -1.25318948 2.37684575

## C

O 1.78609545 -0.12197138 -0.00020336  
C 0.68093671 0.34871823 0.00033045  
C -0.56401570 -0.45264405 0.00013479  
C -1.75717215 0.14447965 -0.00008433  
H -0.44449351 -1.53910207 0.00020772  
H -1.83258948 1.23630786 -0.00015071  
H -2.69011219 -0.42143111 -0.00019537  
H 0.51993841 1.45667336 -0.00052021

## 9a

P -0.08343200 -1.99436000 -0.640408  
P -0.96349000 -0.25616600 0.110526  
O 2.55573200 -2.51317400 -0.809355  
N 3.92492600 1.40577600 -0.281518  
N 4.64799400 -0.63279000 0.149211  
N -3.88647400 1.29087200 0.605487  
N -5.01718700 -0.54038500 0.126250  
C 3.56355900 0.10490600 -0.178921  
C -3.77185300 -0.00752100 0.252334  
C 4.67741100 -1.93884700 0.737215  
C 1.68557200 -1.53894800 -0.570420  
C 2.81934300 2.54411900 -2.156792  
C -2.84747600 2.23209500 0.879423  
C 2.21009100 -0.27310100 -0.367337  
H 1.52268900 0.57090100 -0.396433  
C 3.44248000 -1.04277000 2.812810  
H 3.51076100 -0.10322300 2.245315  
C 3.11566500 2.47279000 -0.784923  
C 2.71887500 3.46982000 0.130541  
C 4.08115100 -2.15372000 1.992562  
C -2.50012900 2.49179100 2.214226  
C 5.37959400 1.54713600 -0.247984  
H 5.67878200 2.44412600 0.309418  
H 5.76505400 1.63053700 -1.279200  
C 5.43875600 -4.21419700 0.640785

|   |             |             |           |   |             |             |           |
|---|-------------|-------------|-----------|---|-------------|-------------|-----------|
| H | 5.97591100  | -5.01756400 | 0.131865  | C | 3.22197000  | 1.46372200  | -3.146866 |
| C | -5.28905400 | -1.75773200 | -0.576736 | H | 3.78259200  | 0.68501500  | -2.607753 |
| C | -5.13366400 | -1.78943700 | -1.974754 | C | 2.04143300  | 4.58066500  | -0.373613 |
| C | 4.14294000  | -3.44741800 | 2.523936  | H | 1.74298700  | 5.38483500  | 0.299215  |
| H | 3.67961600  | -3.64910200 | 3.491988  | C | -2.97857800 | 1.61603200  | 3.359492  |
| C | 5.79476300  | 0.24409500  | 0.422227  | H | -3.65437700 | 0.85091600  | 2.947830  |
| H | 6.71948100  | -0.18734500 | 0.017543  | C | 1.97395600  | 2.32021200  | 2.230799  |
| H | 5.90773300  | 0.35473200  | 1.514600  | H | 0.95540800  | 2.72621200  | 2.150707  |
| C | -2.26535300 | 2.92409900  | -0.202154 | H | 2.19944000  | 2.15064300  | 3.295251  |
| C | 5.38041400  | -2.94792100 | 0.054346  | H | 1.97609600  | 1.34609600  | 1.722151  |
| C | -2.60942000 | -0.76220600 | 0.000939  | C | -5.85650800 | -2.79045300 | 1.675224  |
| H | -2.83067800 | -1.78061600 | -0.330862 | H | -6.20595500 | -1.77424100 | 1.918590  |
| C | 2.11893600  | 3.66921300  | -2.609282 | C | -3.74620800 | 2.41360500  | 4.416832  |
| H | 1.87248200  | 3.75586300  | -3.669603 | H | -3.09829700 | 3.16469700  | 4.892766  |
| C | -6.00098600 | -4.04904400 | -0.538227 | H | -4.11810100 | 1.74675800  | 5.207701  |
| H | -6.34819600 | -4.93145800 | -0.000812 | H | -4.60428800 | 2.94457400  | 3.979356  |
| C | 6.04471100  | -2.70271500 | -1.291159 | C | 1.98253600  | 0.79629100  | -3.755008 |
| H | 5.91485300  | -1.64014900 | -1.542751 | H | 1.32734100  | 0.37661400  | -2.977321 |
| C | -2.57246000 | 2.52820200  | -1.638774 | H | 2.27969800  | -0.01951400 | -4.429807 |
| H | -2.71731300 | 1.43665600  | -1.647946 | H | 1.39710500  | 1.52082500  | -4.341838 |
| C | 4.81054200  | -4.46942100 | 1.857417  | C | 4.21226800  | -0.83093700 | 4.122486  |
| H | 4.85614800  | -5.46698800 | 2.296374  | H | 4.14179200  | -1.71627200 | 4.771581  |
| C | -1.62874000 | 3.55787000  | 2.464831  | H | 3.79591300  | 0.02366300  | 4.675903  |
| H | -1.35635600 | 3.79944900  | 3.494587  | H | 5.27888800  | -0.63785900 | 3.937043  |
| C | -5.40630200 | -2.99511200 | -2.629396 | C | -4.69812200 | -0.57483400 | -2.781500 |
| H | -5.28832600 | -3.05635900 | -3.713203 | H | -4.56225700 | 0.27370700  | -2.093382 |
| C | -5.27937100 | 1.62892500  | 0.911065  | C | 4.14073400  | 2.02139800  | -4.239198 |
| H | -5.52549800 | 2.62766700  | 0.528937  | H | 3.62034900  | 2.77401000  | -4.849692 |
| H | -5.44043800 | 1.62450600  | 2.002474  | H | 4.46767900  | 1.21539800  | -4.911526 |
| C | 2.98810100  | 3.29709500  | 1.617887  | H | 5.03385800  | 2.49853400  | -3.810498 |
| H | 3.98758100  | 2.84455900  | 1.723355  | C | 1.95906200  | -1.30361900 | 3.091901  |
| C | -1.38128900 | 3.96076700  | 0.096044  | H | 1.37999100  | -1.41363500 | 2.163544  |
| H | -0.90707800 | 4.51599200  | -0.712761 | H | 1.52875000  | -0.46901700 | 3.665492  |
| C | -5.73063300 | -2.87131200 | 0.161989  | H | 1.82675400  | -2.21981500 | 3.687398  |
| C | -5.83331900 | -4.11206000 | -1.920163 | C | 7.54673600  | -2.99831800 | -1.230412 |
| H | -6.04519400 | -5.04224100 | -2.449108 | H | 8.04044500  | -2.42489400 | -0.432066 |
| C | 1.74887200  | 4.68168200  | -1.733295 | H | 8.02710300  | -2.74590100 | -2.186548 |
| H | 1.22586900  | 5.56209500  | -2.111702 | H | 7.73420500  | -4.06489100 | -1.036516 |
| C | -1.09480900 | 4.29880800  | 1.418004  | C | 2.99444300  | 4.61253200  | 2.393290  |
| H | -0.42612100 | 5.13493700  | 1.630475  | H | 3.66602000  | 5.35415100  | 1.938240  |
| C | -6.03940600 | 0.50165500  | 0.215557  | H | 3.32558500  | 4.43652100  | 3.425983  |
| H | -6.91192900 | 0.15131900  | 0.781913  | H | 1.98566600  | 5.04878200  | 2.447318  |
| H | -6.37210700 | 0.78652900  | -0.798609 | C | 5.36641900  | -3.50626000 | -2.405440 |

H 5.42285200 -4.58756500 -2.205082  
H 5.86400300 -3.31993000 -3.368154  
H 4.30977000 -3.22165200 -2.503422  
C -1.78825100 0.87007400 3.975424  
H -1.25353200 0.28616200 3.211335  
H -2.12983300 0.18252600 4.762701  
H -1.07288700 1.57490700 4.426596  
C -5.77955200 -0.17095900 -3.790031  
H -5.93433700 -0.95957100 -4.541124  
H -5.48504700 0.74454500 -4.323663  
H -6.74451800 0.01138800 -3.294982  
C -3.87028700 3.16881700 -2.141420  
H -4.72931500 2.88964800 -1.513711  
H -4.08540900 2.84313400 -3.170346  
H -3.79066100 4.26624400 -2.138380  
C -3.35385400 -0.80780900 -3.480144  
H -2.56234700 -1.06919000 -2.762348  
H -3.04436000 0.10185600 -4.017457  
H -3.42896300 -1.62116800 -4.217626  
C -4.48444700 -2.97445000 2.337210  
H -4.07991000 -3.97039000 2.100966  
H -4.57044100 -2.89131000 3.430715  
H -3.75958300 -2.22441700 1.989553  
C -1.40975900 2.82121700 -2.586128  
H -1.26939000 3.90191800 -2.742679  
H -1.60449500 2.37093600 -3.570284  
H -0.46521400 2.40975200 -2.197240  
C -6.86804700 -3.77984700 2.251129  
H -7.84042600 -3.71082600 1.743273  
H -7.02279600 -3.57717400 3.319946  
H -6.50920300 -4.81633700 2.167124  
C 2.17460000 -3.88267300 -0.756885  
H 1.48832500 -4.12871100 -1.579353  
H 3.10518200 -4.45094800 -0.857891  
H 1.69925100 -4.11153400 0.207827

**9a<sup>M</sup>**

P -0.08343200 -1.99436000 -0.64040800  
P -0.96349000 -0.25616600 0.11052600  
O 2.55573200 -2.51317400 -0.80935500  
N 3.92492600 1.40577600 -0.28151800  
N 4.64799400 -0.63279000 0.14921100  
N -3.88647400 1.29087200 0.60548700

N -5.01718700 -0.54038500 0.12625000  
C 3.56355900 0.10490600 -0.17892100  
C -3.77185300 -0.00752100 0.25233400  
C 1.68557200 -1.53894800 -0.57042000  
C 2.21009100 -0.27310100 -0.36733700  
H 1.52268900 0.57090100 -0.39643300  
C 5.37959400 1.54713600 -0.24798400  
H 5.67878200 2.44412600 0.30941800  
H 5.76505400 1.63053700 -1.27920000  
C 5.79476300 0.24409500 0.42222700  
H 6.71948100 -0.18734500 0.01754300  
H 5.90773300 0.35473200 1.51460000  
C -2.60942000 -0.76220600 0.00093900  
H -2.83067800 -1.78061600 -0.33086200  
C -5.27937100 1.62892500 0.91106500  
H -5.52549800 2.62766700 0.52893700  
H -5.44043800 1.62450600 2.00247400  
C -6.03940600 0.50165500 0.21555700  
H -6.91192900 0.15131900 0.78191300  
H -6.37210700 0.78652900 -0.79860900  
C 2.17460000 -3.88267300 -0.75688500  
H 1.48832500 -4.12871100 -1.57935300  
H 3.10518200 -4.45094800 -0.85789100  
H 1.69925100 -4.11153400 0.20782700  
C 4.67817856 -1.97292507 0.75255740  
H 3.81752377 -2.10341131 1.37476851  
H 4.67462654 -2.71240316 -0.02078570  
H 5.56435647 -2.07843280 1.34285972  
C 3.09342242 2.50211693 -0.79875911  
H 2.50711869 2.14786816 -1.62074192  
H 2.44509375 2.85424870 -0.02379257  
H 3.72281102 3.30225048 -1.12823793  
C -2.81725132 2.25947538 0.88739186  
H -2.19544444 1.88549826 1.67377428  
H -2.22816825 2.40689855 0.00639949  
H -3.24986389 3.19106691 1.18719778  
C -5.29630846 -1.79021550 -0.59549437  
H -4.88809557 -1.73074764 -1.58277640  
H -4.84976226 -2.61074114 -0.07373372  
H -6.35423754 -1.93889790 -0.65532410

**11<sup>M</sup>**

P -0.1926530 1.5380980 0.8429610

P -1.0247450 -0.5353440 0.8030650  
O 2.3947850 2.1641300 0.4383310  
N 4.0461430 -1.5856370 0.5694950  
N 3.9810500 0.0680550 -0.9039250  
N -3.5949630 -0.5951690 -1.2716410  
N -5.1081920 -0.0760700 0.2988750  
C 3.3155190 -0.4924010 0.1523350  
C -3.7439460 -0.2684080 0.0693260  
C 1.4911990 1.1713500 0.6334810  
C 2.1096530 -0.1252260 0.7126150  
H 1.6073720 -0.8819140 1.3101010  
C 5.0334630 -1.9398430 -0.4298490  
H 4.6428260 -2.6921100 -1.1432820  
H 5.9441150 -2.3408010 0.0363160  
C 5.2578740 -0.5893240 -1.1121050  
H 6.0865060 -0.0339440 -0.6370810  
H 5.4748820 -0.6834420 -2.1852600  
C -2.7839930 -0.1548990 1.0274740  
H -3.1226040 0.1685160 2.0112650  
C -4.8794780 -0.5154400 -1.9427320  
H -4.9868190 -1.2947140 -2.7111600  
H -5.0196960 0.4724330 -2.4241990  
C -5.8486170 -0.6919640 -0.7844730  
H -6.8136370 -0.1921630 -0.9495890  
H -6.0368660 -1.7676180 -0.5907170  
C 1.9274110 3.4785290 0.2705120  
H 1.4018200 3.8270690 1.1743740  
H 2.8085190 4.1054810 0.0877900  
H 1.2264830 3.5449580 -0.5787890  
C 3.4444980 1.0184150 -1.8415800  
H 2.3475930 0.9935210 -1.7972030  
H 3.7733850 2.0497930 -1.6418530  
H 3.7609290 0.7318070 -2.8565430  
C 3.5329640 -2.5540840 1.4982770  
H 3.1433190 -2.0422790 2.3888480  
H 2.7221530 -3.1715010 1.0686290  
H 4.3508310 -3.2156070 1.8130690  
C -2.3998500 -0.2770450 -2.0271930  
H -1.8915090 0.6085940 -1.6101300  
H -1.6791280 -1.1061050 -2.0384200  
H -2.6904620 -0.0522620 -3.0640500  
C -5.6378850 -0.1671830 1.6333930  
H -5.4186020 -1.1421450 2.1100060

H -5.2212890 0.6271620 2.2673090  
H -6.7260550 -0.0256730 1.5927110  
H -0.7625150 -0.8745300 2.1643010

### 3a\_dimer<sup>M</sup>

P 1.5240760 -1.1116120 -0.180737  
P -0.6211040 -0.7755440 -0.804439  
P 1.5238260 1.1116130 0.180346  
P -0.6212060 0.7751660 0.804129  
O -0.8536160 -3.3674620 -0.133908  
O -0.8542300 3.3671280 0.133919  
N 3.3844410 -3.5008550 -1.502149  
N 4.0276690 -2.2611070 -3.248332  
N -3.2994870 -4.3271300 1.365441  
N -4.1314860 -2.6449550 2.567860  
N 4.0258560 2.2621400 3.248858  
N 3.3836320 3.5015940 1.502136  
N -3.3002120 4.3264290 -1.365630  
N -4.1316010 2.6441350 -2.568303  
C -1.3950100 -2.2835350 0.038601  
C -2.5972390 -2.0281980 0.790615  
H -2.8311390 -0.9866330 1.001163  
C -3.2989500 -2.9726590 1.518051  
C 2.4468160 -1.2156930 -1.719955  
H 2.4332720 -0.3509460 -2.384242  
C 3.2207850 -2.2726020 -2.109755  
C -1.3953330 2.2830930 -0.038847  
C -2.5974560 2.0275890 -0.790960  
H -2.8311290 0.9859920 -1.001618  
C -3.2993020 2.9719730 -1.518377  
C 2.4465100 1.2160790 1.719551  
H 2.4329660 0.3514550 2.384005  
C 3.2199640 2.2732740 2.109657  
C -4.1945640 -4.9427200 2.331979  
H -3.7662650 -5.8609070 2.758168  
H -5.1569370 -5.2002200 1.850922  
C -4.3697710 -3.8360170 3.365535  
H -5.3698260 -3.8271890 3.820705  
H -3.6173670 -3.9245780 4.172584  
C 5.0140340 -3.3166590 -3.126026  
H 5.9161120 -2.9674900 -2.583577  
H 5.3235930 -3.6966890 -4.109998  
C 4.2529540 -4.3434200 -2.300923

H 3.6644630 -5.0187450 -2.952588  
H 4.9133980 -4.9587340 -1.672637  
C -4.1955350 4.9418250 -2.332078  
H -3.7675890 5.8602430 -2.758117  
H -5.1580040 5.1988710 -1.850971  
C -4.3703350 3.8352180 -3.365805  
H -5.3703910 3.8261010 -3.820959  
H -3.6179750 3.9241920 -4.172848  
C 5.0112200 3.3187670 3.128107  
H 5.9143190 2.9708490 2.586566  
H 5.3192070 3.6988030 4.112581  
C 4.2499070 4.3449550 2.302507  
H 3.6596980 5.0191570 2.953775  
H 4.9103870 4.9614250 1.675393  
C -4.0179040 1.3634740 -3.228033  
H -2.9868610 1.1626760 -3.569766  
H -4.3172690 0.5510420 -2.552637  
H -4.6980020 1.3526830 -4.089183  
C -3.0570250 5.0041320 -0.107689  
H -3.0908940 4.2802050 0.715061  
H -2.0735460 5.4875310 -0.082322  
H -3.8510420 5.7534150 0.039398  
C 4.4273140 -1.0133490 -3.844469  
H 4.9603070 -0.3557810 -3.131340  
H 5.0852130 -1.2252320 -4.697830  
H 3.5517700 -0.4698250 -4.223626  
C 2.3987780 -4.1224720 -0.639252  
H 2.5880510 -3.9171670 0.424415  
H 1.3782000 -3.7765960 -0.864097  
H 2.4396050 -5.2107210 -0.797004  
C 2.3984670 4.1221960 0.637897  
H 1.3775430 3.7776570 0.863406  
H 2.4404340 5.2107240 0.793198  
H 2.5876170 3.9143280 -0.425270  
C 4.4255410 1.0146500 3.845488  
H 3.5499910 0.4709990 4.224489  
H 4.9589210 0.3569920 3.132738  
H 5.0830980 1.2269010 4.699016  
C -3.0560010 -5.0049240 0.107619  
H -2.0725170 -5.4883320 0.082524  
H -3.8499750 -5.7542320 -0.039607  
H -3.0896850 -4.2810640 -0.715190  
C -4.0181080 -1.3642800 3.227607

H -2.9873520 -1.1636860 3.570343  
H -4.3166400 -0.5518450 2.551863  
H -4.6990510 -1.3532640 4.088089

### **3a\_dimer\_iso<sup>M</sup>**

P -1.3218600 -0.6452360 0.7367780  
P 0.6401590 -1.3276660 1.5936120  
P 1.3219280 0.6451540 0.7367720  
P -0.6400660 1.3276120 1.5935960  
O 0.4313940 -3.1266120 -0.4488840  
O -0.4313040 3.1266160 -0.4488900  
N -3.9998860 -2.3992690 0.2484640  
N -4.8474790 -2.0447040 2.2943500  
N 2.9606700 -3.5778050 -2.1417290  
N 4.4436390 -1.9806510 -1.6591900  
N 4.8475380 2.0447180 2.2943660  
N 3.9999170 2.3993260 0.2485010  
N -2.9607730 3.5778110 -2.1416960  
N -4.4438280 1.9807850 -1.6589580  
C 1.2279810 -2.4371740 0.1690170  
C 2.6439270 -2.2842990 -0.0635390  
H 3.1516500 -1.5562600 0.5684240  
C 3.3043740 -2.6287960 -1.2271710  
C -2.6129610 -1.1564850 1.8815140  
H -2.5647390 -0.8365610 2.9226920  
C -3.7313710 -1.8339270 1.4855780  
C -1.2278720 2.4371420 0.1689960  
C -2.6438020 2.2842030 -0.0635990  
H -3.1514920 1.5561810 0.5684010  
C -3.3044040 2.6288110 -1.2270950  
C 2.6130390 1.1564390 1.8814830  
H 2.5648480 0.8364160 2.9226340  
C 3.7314450 1.8338880 1.4855580  
C 3.9266560 -3.6040380 -3.2270550  
H 3.4399890 -3.7252230 -4.2052980  
H 4.6344860 -4.4428340 -3.0867590  
C 4.6233030 -2.2555190 -3.0756990  
H 5.6860930 -2.2878470 -3.3530480  
H 4.1234960 -1.4816830 -3.6893710  
C -5.9809320 -2.3451760 1.4414780  
H -6.4922760 -1.4181250 1.1085500  
H -6.7164590 -2.9814590 1.9535110  
C -5.3027630 -3.0389030 0.2701970



|   |            |            |            |   |            |            |            |
|---|------------|------------|------------|---|------------|------------|------------|
| H | -5.2041780 | -4.1258770 | 0.4566060  | H | -3.3383750 | -3.9255640 | -1.0060580 |
| H | -5.8425270 | -2.9010620 | -0.6785980 | H | -2.7657860 | -2.3017160 | -1.4865410 |
| C | -3.9269110 | 3.6041130  | -3.2268880 | C | -5.0667600 | -1.2130950 | 3.4493170  |
| H | -3.4403620 | 3.7253320  | -4.2051840 | H | -4.2600800 | -1.3502150 | 4.1810620  |
| H | -4.6347170 | 4.4429050  | -3.0864550 | H | -5.1187940 | -0.1378680 | 3.1890690  |
| C | -4.6235280 | 2.2555960  | -3.0754740 | H | -6.0084770 | -1.5128620 | 3.9276490  |
| H | -5.6863270 | 2.2878760  | -3.3527970 | C | -4.7620050 | 0.6611400  | -1.1554280 |
| H | -4.1236990 | 1.4817570  | -3.6891290 | H | -5.6198190 | 0.2692210  | -1.7178360 |
| C | 5.9809550  | 2.3453500  | 1.4415090  | H | -3.9087850 | -0.0365920 | -1.2425970 |
| H | 6.4924090  | 1.4183640  | 1.1085530  | H | -5.0459030 | 0.7064290  | -0.0944790 |
| H | 6.7164150  | 2.9816900  | 1.9535720  | C | -2.2277800 | 4.7862030  | -1.8225090 |
| C | 5.3027380  | 3.0390500  | 0.2702320  | H | -2.1008750 | 4.8623090  | -0.7375710 |
| H | 5.2041010  | 4.1260280  | 0.4566050  | H | -1.2277900 | 4.7916360  | -2.2733610 |
| H | 5.8425450  | 2.9012250  | -0.6785480 | H | -2.8056830 | 5.6525870  | -2.1846400 |
| C | 2.2277610  | -4.7862120 | -1.8224460 | C | 5.0669480  | 1.2129710  | 3.4492090  |
| H | 2.1010130  | -4.8623130 | -0.7374880 | H | 6.0085520  | 1.5129040  | 3.9276640  |
| H | 1.2277130  | -4.7916770 | -2.2731660 | H | 4.2601870  | 1.3497620  | 4.1809230  |
| H | 2.8056460  | -5.6525830 | -2.1846430 | H | 5.1192910  | 0.1378000  | 3.1887890  |
| C | 4.7618350  | -0.6610260 | -1.1556060 | C | 2.9821650  | 2.9541640  | -0.6274950 |
| H | 3.9084350  | 0.0365430  | -1.2422920 | H | 2.7655190  | 2.3012910  | -1.4862900 |
| H | 5.0462370  | -0.7064080 | -0.0947960 | H | 2.0313080  | 3.1166790  | -0.1002190 |
| H | 5.6193080  | -0.2688700 | -1.7183610 | H | 3.3383930  | 3.9252250  | -1.0064540 |
| C | -2.9821960 | -2.9543260 | -0.6274820 |   |            |            |            |
| H | -2.0312580 | -3.1165840 | -0.1002890 |   |            |            |            |

## S4: References

- [1] a) A. J. Arduengo, III, F. Davidson, H. V. R. Dias, J. R. Goerlich, D. Khasnis, W. J. Marshall, T. K. Prakasha, *J. Am. Chem. Soc.* **1997**, 119, 12742-12749; b) I. C. Watson, A. Schumann, H. Yu, E. C. Davy, R. McDonald, M. J. Ferguson, C. Hering-Junghans, E. Rivard, *Chem. Eur. J.* **2019**, 25, 9678 – 9690; c) C. Hering-Junghans, P. Andreiuk, M. J. Ferguson, R. McDonald, E. Rivard, *Angew. Chem. Int. Ed.* **2017**, 56, 6272–6275; d) J. Lin, S. Liu, J. Zhang, H. Grützmacher, C.-Y. Su, Z. Li, *Chem. Sci.* **2023**, 14, 10944–10952; e) D. Rottschäfer, M. K. Sharma, B. Neumann, H. Stammler, D. M. Andrada, R. S. Ghadwal, *Chem. Eur. J.* **2019**, 25, 8127–8134; f) H. Klöcker, M. Layh, A. Hepp, W. Uhl, *Dalton Trans.*, **2016**, 45, 2031-2043. g) Kuhn, N.; Kratz, T. *Synthesis*

- of Imidazol-2-ylidenes by Reduction of Imidazole-2(3H)-thiones. *Synthesis* 1993, **1993**, 561-562.
- [2] M. J. Frisch, G. W. Trucks, H. B. Schlegel, G. E. Scuseria, M. A. Robb, J. R. Cheeseman, G. Scalmani, V. Barone, G. A. Petersson, H. Nakatsuji, X. Li, M. Caricato, A. V. Marenich, J. Bloino, B. G. Janesko, R. Gomperts, B. Mennucci, H. P. Hratchian, J. V. Ortiz, A. F. Izmaylov, J. L. Sonnenberg, D. Williams-Young, F. Ding, F. Lipparini, F. Egidi, J. Goings, B. Peng, A. Petrone, T. Henderson, D. Ranasinghe, V. G. Zakrzewski, J. Gao, N. Rega, G. Zheng, W. Liang, M. Hada, M. Ehara, K. Toyota, R. Fukuda, J. Hasegawa, M. Ishida, T. Nakajima, Y. Honda, O. Kitao, H. Nakai, T. Vreven, K. Throssell, J. A. Montgomery Jr., J. E. Peralta, F. Ogliaro, M. J. Bearpark, J. J. Heyd, E. N. Brothers, K. N. Kudin, V. N. Staroverov, T. A. Keith, R. Kobayashi, J. Normand, K. Raghavachari, A. P. Rendell, J. C. Burant, S. S. Iyengar, J. Tomasi, M. Cossi, J. M. Millam, M. Klene, C. Adamo, R. Cammi, J. W. Ochterski, R. L. Martin, K. Morokuma, O. Farkas, J. B. Foresman, D. J. Fox, Gaussian 16, Revision C.01 ed., Gaussian, Inc., Wallingford CT, **2016**.
- [3] A. Bondi, *J. Phys. Chem.* **1964**, *68*, 441.
- [4] NBO 7.0. E. D. Glendening, J. K. Badenhoop, A. E. Reed, J. E. Carpenter, J. A. Bohmann, C. M. Morales, P. Karafiloglou, C. R. Landis, and F. Weinhold, Theoretical Chemistry Institute, University of Wisconsin, Madison, WI (**2018**).
